# Supplementary material
Source: Royal Society of Chemistry journal article supplement (doi:10.1039/d5ob01959a)
Supplement: d5ob01959a1.pdf [file d5ob01959a1.pdf]

## Supplementary Information

# Acid-catalysed divergent synthesis of 2-substituted 1,3-benzazoles with antioxidant and mitochondrial protective effects

Kalleshappa Sheela,<sup>a,c</sup> Chikkappaiahnayaka Santhosh,<sup>a</sup> Kalleshappa Sharath,<sup>a</sup> Aishwarya Bharathi H M,<sup>b</sup> Prabitha Prabhakaran,<sup>\*b</sup> and Maralinganadoddi P Sadashiva<sup>\*a</sup>

<sup>a</sup>Department of Studies in Chemistry, University of Mysore, Manasagangotri, Mysuru-570006, India.

<sup>b</sup>Department of Pharmaceutical Chemistry, JSS College of Pharmacy, JSS Academy of Higher Education & Research, Mysuru, India- 570015

<sup>c</sup>Department of Chemistry, IDSG Government First Grade College, Chikmagalur, Karnataka 577102, India.

*E-mail:* sadashivamp@chemistry.uni-mysore.ac.in; mpsadashiva@gmail.com

| Sl.No | Content                                                                                        | Page No |
|-------|------------------------------------------------------------------------------------------------|---------|
| 1     | General procedure for the synthesis of benzimidazole-2-carboxylate derivatives ( <b>4a–p</b> ) | 1       |
| 2     | Characterization details of compounds <b>4a–p</b> and <b>7a–b</b>                              | 2-5     |
| 3     | General procedure for the synthesis of benzoxazole-2-carboxylate derivatives ( <b>5a–o</b> )   | 6       |
| 4     | Characterization details of compounds <b>5a–o</b>                                              | 7-10    |
| 5     | General procedure for the synthesis of benzothiazole-2-carboxylate derivatives ( <b>6a–m</b> ) | 11      |
| 6     | Characterization details of compounds <b>6a–m</b>                                              | 12-15   |
| 7     | Spectral details of compounds <b>4a–p</b>                                                      | 16-31   |
| 8     | Spectral details of compounds <b>5a–o</b>                                                      | 32-46   |
| 9     | Spectral details of compounds <b>6a–m</b> and <b>7a–b</b>                                      | 47-60   |
| 10    | Biological data                                                                                | 61-65   |

## General Procedure for the Synthesis of Benzimidazole-2-carboxylates (4a-p)

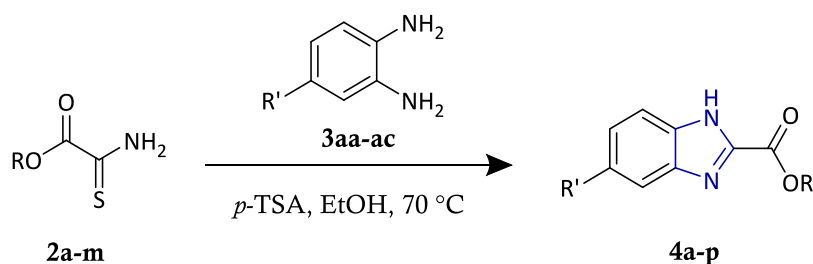

**Reaction conditions:** **2a-m** (1 mmol, 1 equiv.), **3aa-3ac** (1 mmol, 1 equiv.), *p*-TSA (0.1 mmol, 0.1 equiv.), EtOH (4 mL), 70 °C, 11 h.

To a solution of *alkyl/arylmethyl thiooxamates* **2a-m** (1.0 mmol, 1.0 equiv.) and *ortho-phenylenediamines* **3aa-ac** (1.0 mmol, 1.0 equiv.) in ethanol (4 mL), *para-toluenesulfonic acid* (*p*-TSA) (0.1 mmol, 0.1 equiv.) was added. The resulting mixture was stirred at 70 °C in oil bath for 11 hours with continuous magnetic stirring. The reaction progress was monitored by thin-layer chromatography (TLC). Upon completion, the solvent was removed under reduced pressure and reaction mixture was extracted with ethyl acetate and water. The aqueous layer was further extracted twice with ethyl acetate. The combined organic extract was dried over anhydrous sodium sulfate (Na<sub>2</sub>SO<sub>4</sub>), filtered, and concentrated in vacuo to yield the crude product. The residue was then purified by silica gel column chromatography using a gradient of ethyl acetate and hexane as the eluent, affording the desired *benzimidazole-2-carboxylates* (**4a-p**)

## Characterization details of Benzimidazole-2-carboxylates (4a–p)

**Benzyl 1H-benzo[d]imidazole-2-carboxylate (4a):** Pale yellow solid; **Yield** 0.166 g (66%); mp

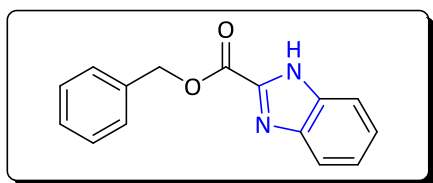

120-122 °C. <sup>1</sup>H NMR (600 MHz, DMSO-d<sub>6</sub>): δ 13.47 (s, 1H, NH), 7.86 – 7.54 (m, 1H, Ar-H), 7.55 – 7.45 (m, 2H, Ar-H), 7.42 – 7.37 (m, 2H, Ar-H), 7.31 – 7.23 (m, 4H, Ar-H), 5.41 (s, 2H, Ar-CH<sub>2</sub>). <sup>13</sup>C NMR (151 MHz, DMSO-d<sub>6</sub>):

δ 159.7, 142.0, 137.9, 136.0, 129.1, 129.0, 128.9, 128.9, 128.2, 123.6, 121.3, 113.3, 67.5. **HRMS** (ESI-TOF) *m/z*: [M + H]<sup>+</sup> calcd for C<sub>15</sub>H<sub>13</sub>N<sub>2</sub>O<sub>2</sub> 253.0977; found 253.0974

**4-methylbenzyl 1H-benzo[d]imidazole-2-carboxylate (4b):** Pale yellow solid; **Yield** 0.164 g

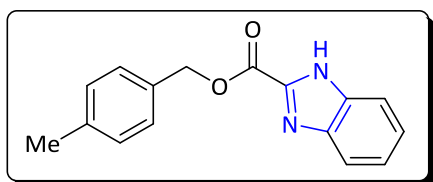

(62%); mp 140-142 °C. <sup>1</sup>H NMR (600 MHz, DMSO-d<sub>6</sub>): δ 13.47 (s, 1H, NH), 7.72 (d, *J* = 8.2 Hz, 1H, Ar-H), 7.53 (d, *J* = 8.2 Hz, 1H, Ar-H), 7.36 (d, *J* = 7.8 Hz, 2H, Ar-H), 7.33 (t, *J* = 7.8 Hz, 1H, Ar-H), 7.25 (t, *J* = 7.7 Hz, 1H, Ar-H),

7.19 (d, *J* = 7.6 Hz, 2H, Ar-H), 5.36 (s, 2H, Ar-CH<sub>2</sub>), 2.27 (s, 3H, CH<sub>3</sub>). <sup>13</sup>C NMR (151 MHz, DMSO-d<sub>6</sub>): δ 159.7, 143.4, 142.0, 138.3, 134.9, 133.0, 129.6, 129.2, 125.7, 123.5, 121.3, 113.3, 67.4, 21.3. **HRMS** (ESI-TOF) *m/z*: [M + H]<sup>+</sup> calcd for C<sub>16</sub>H<sub>15</sub>N<sub>2</sub>O<sub>2</sub> 267.1134; found 267.1130

**2-methoxybenzyl 1H-benzo[d]imidazole-2-carboxylate (4c):** Pale yellow solid; **Yield** 0.169 g

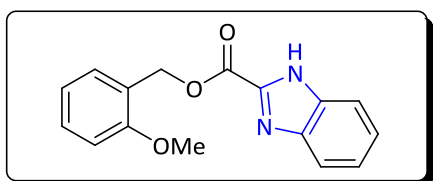

(60%); mp 190-192 °C. <sup>1</sup>H NMR (400 MHz, DMSO-d<sub>6</sub>): δ 13.50 (s, 1H, NH), 7.67 (s, 2H, Ar-H), 7.49 (dd, *J* = 7.5, 1.8 Hz, 1H, Ar-H), 7.43 – 7.21 (m, 3H, Ar-H), 7.09 (dd, *J* = 8.3, 1.0 Hz, 3H, Ar-H), 7.01 (td, *J* = 7.5, 1.1 Hz, 1H, Ar-

H), 5.43 (s, 2H, Ar-CH<sub>2</sub>), 3.83 (s, 3H, OCH<sub>3</sub>). <sup>13</sup>C NMR (101 MHz, DMSO-d<sub>6</sub>): δ 159.7, 157.8, 153.4, 143.5, 141.9, 132.3, 130.6, 130.5, 125.6, 124.1, 123.5, 120.8, 113.4, 111.5, 63.0, 56.0. **HRMS** (ESI-TOF) *m/z*: [M + H]<sup>+</sup> calcd for C<sub>16</sub>H<sub>15</sub>N<sub>2</sub>O<sub>3</sub> 283.1083; found 283.1080

**4-methoxybenzyl 1H-benzo[d]imidazole-2-carboxylate (4d):** Pale yellow solid; **Yield** 0.163 g

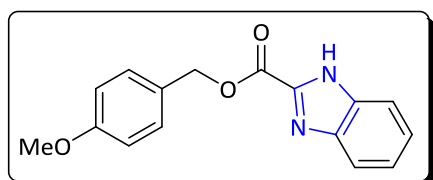

(58%); mp 185-187 °C. <sup>1</sup>H NMR (600 MHz, DMSO-d<sub>6</sub>): δ 13.44 (s, 1H, 1NH), 7.71 (d, *J* = 8.2 Hz, 1H, Ar-H), 7.54 (dd, *J* = 16.6, 8.1 Hz, 1H, Ar-H), 7.42 (d, *J* = 8.4 Hz, 2H, Ar-H), 7.36 – 7.18 (m, 2H, Ar-H), 6.95 (d, *J* = 8.8 Hz, 2H,

Ar-H), 5.33 (s, 2H, CH<sub>2</sub>), 3.73 (s, 3H, OCH<sub>3</sub>). <sup>13</sup>C NMR (151 MHz, DMSO-d<sub>6</sub>): δ 160.0, 159.7, 143.4, 142.1, 134.9, 131.1, 127.9, 125.7, 123.5, 121.3, 114.5, 113.3, 67.4, 55.7. **HRMS** (ESI-TOF) *m/z*: [M + H]<sup>+</sup> calcd for C<sub>16</sub>H<sub>15</sub>N<sub>2</sub>O<sub>3</sub> 283.1083; found 283.1081

**4-fluorobenzyl 1H-benzo[d]imidazole-2-carboxylate (4e):** Pale yellow solid; **Yield** 0.162 g

(60%); mp 165-167 °C. <sup>1</sup>H NMR (600 MHz, DMSO-d<sub>6</sub>): δ 13.48 (s, 1H, NH), 7.75 – 7.70 (m, 1H, Ar-H), 7.55 (ddd, *J* = 11.7, 6.9, 4.1 Hz, 3H, Ar-H), 7.34 (s, 1H, Ar-H), 7.19 (dt, *J* = 47.2, 8.9

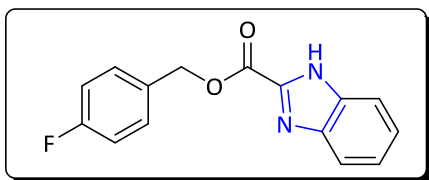

Hz, 3H, Ar-H), 5.39 (s, 2H, Ar-CH<sub>2</sub>). <sup>13</sup>C NMR (151 MHz, DMSO-d<sub>6</sub>): δ 162.6 (d, *J* = 244.7 Hz), 159.6, 142.0, 132.3 (d, *J* = 3.2 Hz), 131.44 (d, *J* = 8.3 Hz), 130.57 (d, *J* = 8.2 Hz), 125.7, 123.5, 121.3, 115.93 (d, *J* = 21.4 Hz), 115.67 (d, *J* = 21.0 Hz), 113.3, 66.8. **HRMS** (ESI-TOF) *m/z*: [M + H]<sup>+</sup> calcd for C<sub>15</sub>H<sub>12</sub>FN<sub>2</sub>O<sub>2</sub> 271.0883; found 271.0886

**4-(trifluoromethyl)benzyl 1H-benzo[d]imidazole-2-carboxylate (4f):** Pale yellow solid; **Yield**

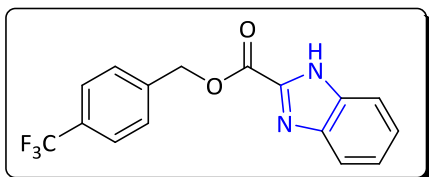

0.188 g (59%); mp 173-175 °C. <sup>1</sup>H NMR (400 MHz, DMSO-d<sub>6</sub>): δ 13.40 (s, 1H, NH), 7.82-7.72 (m, 2H, Ar-H), 7.69 – 7.62 (m, 2H, Ar-H), 7.56-7.54 (m, 1H, Ar-H), 7.36 (dt, *J* = 6.1, 3.5 Hz, 2H, Ar-H), 5.55 (s, 2H, Ar-H). <sup>13</sup>C NMR (101 MHz, DMSO-d<sub>6</sub>): δ 159.4, 156.9, 142.8, 141.7, 140.7, 129.2, 128.3, 125.99, 125.90 (q, *J* = 3.7 Hz), 125.76, 125.72, 125.68, 123.3, 66.5. **HRMS** (ESI-TOF) *m/z*: [M + H]<sup>+</sup> calcd for C<sub>16</sub>H<sub>12</sub>F<sub>3</sub>N<sub>2</sub>O<sub>2</sub> 321.0851; found 321.0855

**2-chlorobenzyl 1H-benzo[d]imidazole-2-carboxylate (4g):** Pale yellow solid; **Yield** 0.176 g

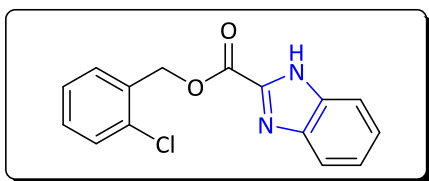

(62%); mp 140-142 °C. <sup>1</sup>H NMR (400 MHz, DMSO-d<sub>6</sub>): δ 13.56 (s, 1H, NH), 7.81 – 7.74 (m, 1H, Ar-H), 7.73 – 7.64 (m, 1H, Ar-H), 7.62 – 7.49 (m, 2H, Ar-H), 7.49 – 7.39 (m, 2H, Ar-H), 7.39 – 7.28 (m, 2H, Ar-H), 5.52 (s, 2H, Ar-CH<sub>2</sub>). <sup>13</sup>C NMR (101 MHz, DMSO-d<sub>6</sub>): δ 159.4, 149.3, 141.6, 133.4, 133.3, 131.3, 130.9, 130.0, 128.0, 125.8, 121.6, 119.6, 113.4, 64.8. **HRMS** (ESI-TOF) *m/z*: [M + H]<sup>+</sup> calcd for C<sub>15</sub>H<sub>12</sub>ClN<sub>2</sub>O<sub>2</sub> 287.0587; found 287.0591

**3-chlorobenzyl 1H-benzo[d]imidazole-2-carboxylate (4h):** Pale yellow solid; **Yield** 0.179 g (63%);

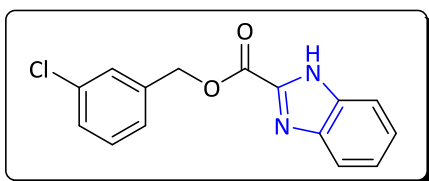

mp 130-132 °C. <sup>1</sup>H NMR (400 MHz, DMSO-d<sub>6</sub>): δ 13.55 (s, 1H, NH), 7.78 (d, *J* = 8.2 Hz, 1H, Ar-H), 7.64 – 7.56 (m, 2H, Ar-H), 7.53 – 7.42 (m, 3H, Ar-H), 7.46 – 7.36 (m, 1H, Ar-H), 7.33 – 7.27 (m, 1H, Ar-H), 5.45 (s, 2H, Ar-CH<sub>2</sub>). <sup>13</sup>C NMR (101 MHz, DMSO-d<sub>6</sub>): δ 159.4, 153.4, 141.8, 138.4, 133.6, 131.0, 128.8, 128.5, 127.4, 125.8, 123.6, 121.2, 113.2, 66.5. **HRMS** (ESI-TOF) *m/z*: [M + H]<sup>+</sup> calcd for C<sub>15</sub>H<sub>12</sub>ClN<sub>2</sub>O<sub>2</sub> 287.0587; found 287.0590

**4-chlorobenzyl 1H-benzo[d]imidazole-2-carboxylate (4i):** Pale yellow solid; **Yield** 0.182 g

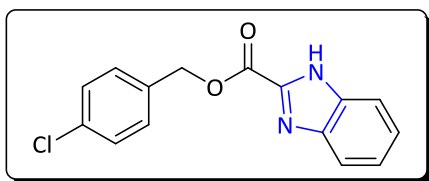

(64%); mp 135-137 °C. <sup>1</sup>H NMR (400 MHz, DMSO-d<sub>6</sub>): δ 13.53 (s, 1H, NH), 7.75 (t, 2H, Ar-H), 7.57 (d, *J* = 8.6 Hz, 2H, Ar-H), 7.51 (d, *J* = 8.4 Hz, 2H, Ar-H), 7.47 – 7.33 (m, 2H, Ar-H), 5.45 (s, 2H, Ar-CH<sub>2</sub>). <sup>13</sup>C NMR (151 MHz, DMSO-d<sub>6</sub>): δ 159.5, 156.9, 144.3, 141.8, 136.9, 135.0, 133.5, 130.8, 130.0, 129.0, 128.8, 125.7,

66.6. **HRMS** (ESI-TOF)  $m/z$ :  $[M + H]^+$  calcd for  $C_{15}H_{12}ClN_2O_2$  287.0587; found 287.0592

**4-bromobenzyl 1H-benzo[d]imidazole-2-carboxylate (4j)**: Pale yellow solid; **Yield** 0.207 g

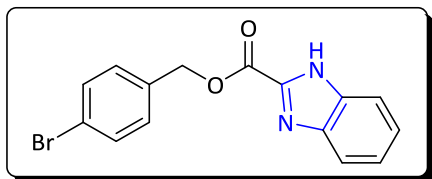

(63%); mp 155-157 °C.  **$^1H$  NMR** (400 MHz, DMSO- $d_6$ ):  $\delta$  13.48 (s, 1H, NH), 7.76 – 7.71 (m, 1H, Ar-H), 7.64 (d,  $J$  = 8.4 Hz, 3H, Ar-H), 7.49 (d,  $J$  = 8.2 Hz, 1H, Ar-H), 7.41 – 7.11 (m, 3H, Ar-H), 5.39 (s, 2H, Ar-CH<sub>2</sub>).  **$^{13}C$  NMR** (151

MHz, DMSO- $d_6$ ):  $\delta$  159.5, 141.8, 135.4, 131.9, 131.7, 131.0, 130.3, 125.8, 123.5, 122.0, 121.4, 113.2, 66.6. **HRMS** (ESI-TOF)  $m/z$ :  $[M + H]^+$  calcd for  $C_{15}H_{12}BrN_2O_2$  331.0082; found 331.0080

**4-nitrobenzyl 1H-benzo[d]imidazole-2-carboxylate (4k)**: Pale yellow solid; **Yield** 0.163 g

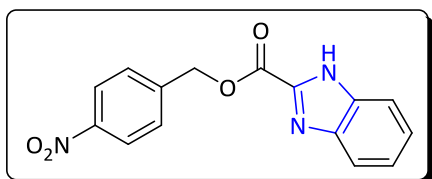

(55%); mp 197-198 °C.  **$^1H$  NMR** (600 MHz, DMSO- $d_6$ ):  $\delta$  13.50 (s, 1H, NH), 8.26 (d,  $J$  = 8.8 Hz, 2H, Ar-H), 7.77 (d,  $J$  = 8.8 Hz, 2H, Ar-H), 7.71 (d,  $J$  = 7.9 Hz, 1H, Ar-H), 7.53 (dd,  $J$  = 20.5, 8.4 Hz, 1H, Ar-H), 7.28 – 7.20 (m, 1H, Ar-

H), 5.56 (s, 2H, Ar-CH<sub>2</sub>).  **$^{13}C$  NMR** (151 MHz, DMSO- $d_6$ ):  $\delta$  160.6, 144.3, 144.0, 135.2, 129.7, 129.4, 129.2, 127.0, 126.9, 124.1, 113.3, 112.6, 67.7. **HRMS** (ESI-TOF)  $m/z$ :  $[M + H]^+$  calcd for  $C_{15}H_{12}N_3O_4$  298.0828; found 298.0830

**Butyl 1H-benzo[d]imidazole-2-carboxylate (4l)**: Pale yellow solid; **Yield** 0.131 g (62%); mp

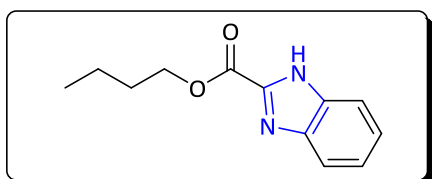

127-129 °C.  **$^1H$  NMR** (400 MHz, DMSO- $d_6$ ):  $\delta$  13.45 (s, 1H, NH), 7.71 – 7.66 (m, 2H, Ar-H), 7.38 – 7.31 (m, 2H, Ar-H), 4.38 (t,  $J$  = 6.6 Hz, 2H, CH<sub>2</sub>), 1.80 – 1.68 (m, 2H, CH<sub>2</sub>), 1.45 (h,  $J$  = 7.3 Hz, 2H, CH<sub>2</sub>), 0.95 (t,  $J$  = 7.3 Hz,

3H, CH<sub>3</sub>).  **$^{13}C$  NMR** (101 MHz, DMSO- $d_6$ ):  $\delta$  159.8, 143.3, 142.1, 134.9, 125.3, 123.5, 121.1, 113.2, 65.7, 30.6, 19.1, 14.0. **HRMS** (ESI-TOF)  $m/z$ :  $[M + H]^+$  calcd for  $C_{12}H_{15}N_2O_2$  219.1134; found 219.1130

**3-methylcyclohexyl 1H-benzo[d]imidazole-2-carboxylate (4m)**: Pale yellow solid; **Yield** 0.165 g

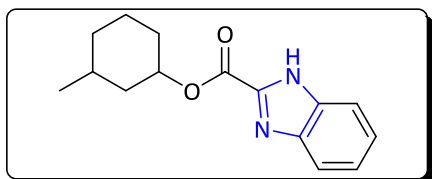

(64%); mp 120-122 °C.  **$^1H$  NMR** (600 MHz, DMSO- $d_6$ ):  $\delta$  13.41 (s, 1H, NH), 8.14 (dt,  $J$  = 7.9, 2.0 Hz, 1H, Ar-H), 7.85 (ddd,  $J$  = 8.5, 7.1, 1.6 Hz, 1H, Ar-H), 7.79 (ddd,  $J$  = 8.3, 5.4, 1.2 Hz, 1H, Ar-H), 7.61 (ddd,  $J$  = 8.2, 7.1, 1.3 Hz, 1H, Ar-H),

4.85 (td,  $J$  = 11.0, 5.5 Hz, 1H, CH), 2.04 – 1.80 (m, 3H, CH<sub>2</sub>), 1.77 – 1.44 (m, 4H, CH<sub>2</sub>), 1.41 – 1.23 (m, 2H, CH<sub>2</sub>), 1.14 (q,  $J$  = 11.9 Hz, 1H, CH), 0.89 (d,  $J$  = 6.6 Hz, 3H, CH<sub>3</sub>).  **$^{13}C$  NMR** (151 MHz, DMSO- $d_6$ ):  $\delta$  161.6, 160.1, 147.8, 144.2, 135.4, 129.0, 126.6, 123.5, 76.4, 33.9, 31.3, 31.2, 23.9, 22.6, 20.6. **HRMS** (ESI-TOF)  $m/z$ :  $[M + H]^+$  calcd for  $C_{15}H_{19}N_2O_2$  259.1447; found 259.1443

**2,6-dichlorobenzyl 1H-benzo[d]imidazole-2-carboxylate (4n):** Pale yellow solid; **Yield** 0.185 g

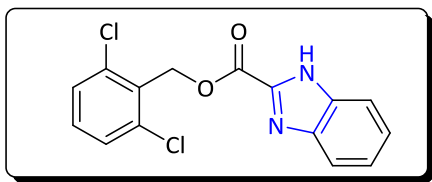

(61%); mp 170-172 °C.  $^1\text{H NMR}$  (400 MHz, DMSO- $d_6$ ):  $\delta$  13.55 (s, 1H, NH), 7.74 (d,  $J = 8.3$  Hz, 1H, Ar-H), 7.67 – 7.58 (m, 2H, Ar-H), 7.55 – 7.43 (m, 2H, Ar-H), 7.40 – 7.28 (m, 2H, Ar-H), 5.64 (s, 2H, Ar- $\text{CH}_2$ ).  $^{13}\text{C NMR}$  (101 MHz, DMSO- $d_6$ ):  $\delta$  159.4, 143.3, 141.3, 136.7, 132.5, 130.8, 129.3, 129.0, 125.8, 123.6, 121.2, 113.2, 62.6. **HRMS** (ESI-TOF)  $m/z$ :  $[\text{M} + \text{H}]^+$  calcd for  $\text{C}_{15}\text{H}_{11}\text{Cl}_2\text{N}_2\text{O}_2$  321.0198; found 321.0202

**Benzyl 5-methyl-1H-benzo[d]imidazole-2-carboxylate (4o):** Pale yellow solid; **Yield** 0.164 g

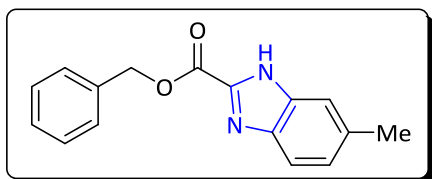

(62%); mp 166-168 °C.  $^1\text{H NMR}$  (400 MHz, DMSO- $d_6$ ):  $\delta$  13.37 (s, 1H, NH), 8.17 – 8.09 (m, 1H, Ar-H), 7.75 (d,  $J = 8.9$  Hz, 1H, Ar-H), 7.48 – 7.33 (m, 1H, Ar-H), 7.30 – 7.07 (m, 5H, Ar-H), 5.49 (s, 2H, Ar- $\text{CH}_2$ ), 2.29 (s, 3H,  $\text{CH}_3$ ).  $^{13}\text{C NMR}$  (101 MHz, DMSO- $d_6$ ):  $\delta$  157.1, 143.1, 141.5, 137.4, 134.8, 130.2, 129.3, 128.3, 127.7, 127.4, 126.8, 118.4, 65.2, 21.2. **HRMS** (ESI-TOF)  $m/z$ :  $[\text{M} + \text{H}]^+$  calcd for  $\text{C}_{16}\text{H}_{15}\text{N}_2\text{O}_2$  267.1134; found 267.1132

**Benzyl 5-nitro-1H-benzo[d]imidazole-2-carboxylate (4p):** Pale yellow solid; **Yield** 0.154 g (52%);

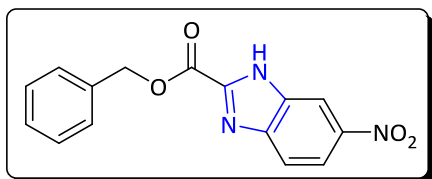

mp 173-175 °C.  $^1\text{H NMR}$  (400 MHz, DMSO- $d_6$ ):  $\delta$  13.60 (s, 1H, NH), 8.20 (dd,  $J = 9.0, 2.3$  Hz, 1H, Ar-H), 7.81 (d,  $J = 9.0$  Hz, 1H, Ar-H), 7.53 (d,  $J = 7.3$  Hz, 2H, Ar-H), 7.48 – 7.24 (m, 2H, Ar-H), 5.47 (s, 2H, Ar- $\text{CH}_2$ ).  $^{13}\text{C NMR}$  (101 MHz, DMSO- $d_6$ ):  $\delta$  158.9, 157.1, 146.1, 144.4, 137.8, 135.6, 129.1, 129.0, 129.0, 128.8, 128.2, 128.1, 67.9. **HRMS** (ESI-TOF)  $m/z$ :  $[\text{M} + \text{H}]^+$  calcd for  $\text{C}_{15}\text{H}_{12}\text{N}_3\text{O}_4$  298.0828; found 298.0833

**Benzyl 2-(phenylamino)-2-thioacetate (7a):** Yellow gummy solid; **Yield** 0.211 g (78%).  $^1\text{H}$

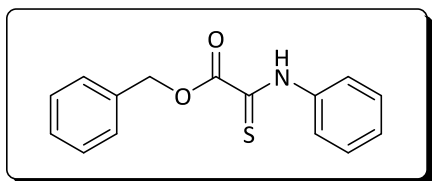

**NMR** (400 MHz,  $\text{CDCl}_3$ ):  $\delta$  10.57 (s, 1H, NH), 8.08 – 7.91 (m, 2H, Ar-H), 7.56 – 7.36 (m, 7H, Ar-H), 7.36 – 7.30 (m, 1H, Ar-H), 5.42 (s, 2H,  $\text{CH}_2$ ).  $^{13}\text{C NMR}$  (101 MHz,  $\text{CDCl}_3$ ):  $\delta$  178.9, 159.5, 137.7, 134.5, 129.1, 128.8, 128.8, 128.4, 127.4, 122.0, 69.7. **HRMS** (ESI-TOF)  $m/z$ :  $[\text{M} + \text{H}]^+$  calcd for  $\text{C}_{15}\text{H}_{14}\text{NO}_2\text{S}$  272.0745; found 272.0741

**Benzyl 2-thioxo-2-(*o*-tolylamino)acetate (7b)** Yellow gummy solid; **Yield** 0.230 g (81%).  $^1\text{H NMR}$

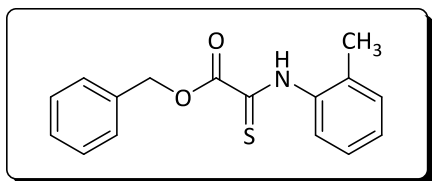

(400 MHz,  $\text{CDCl}_3$ ):  $\delta$  10.39 (s, 1H, NH), 8.11 – 7.95 (m, 1H, Ar-H), 7.52 (dd,  $J = 8.0, 1.7$  Hz, 1H, Ar-H), 7.49 – 7.37 (m, 4H, Ar-H), 7.34 – 7.30 (m, 2H, Ar-H), 7.14 – 6.97 (m, 1H, Ar-H), 5.44 (s, 2H,  $\text{CH}_2$ ).  $^{13}\text{C NMR}$  (101 MHz,  $\text{CDCl}_3$ ):  $\delta$  180.6, 159.4, 131.1, 130.5, 128.8, 128.4, 128.1, 1267.0, 126.8, 124.2, 118.7, 115.0, 69.6, 17.7. **HRMS** (ESI-TOF)  $m/z$ :  $[\text{M} + \text{H}]^+$  calcd for  $\text{C}_{16}\text{H}_{16}\text{NO}_2\text{S}$  286.0902; found 286.0906

## General Procedure for the Synthesis of Benzoxazole-2-carboxylates (5a–o)

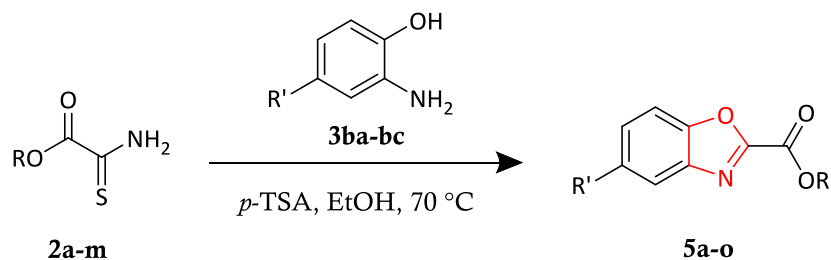

**Reaction condition:** **2a–m** (1 mmol, 1 equiv.), **3ba–3bc** (1 mmol, 1 equiv.), *p*-TSA (0.1 mmol, 0.1 equiv.), EtOH (4 mL), 70 °C, 11 h.

To a solution of *alkyl/arylmethyl thiooxamates* **2a–m** (1.0 mmol, 1.0 equiv.) and *ortho-aminophenols* **3ba–bc** (1.0 mmol, 1.0 equiv.) in ethanol (4 mL), *para*-toluenesulfonic acid (*p*-TSA) (0.1 mmol, 0.1 equiv.) was added. The resulting mixture was stirred at 70 °C in oil bath for 11 hours with continuous magnetic confrontation. The reaction progress was monitored by thin-layer chromatography (TLC). Upon completion, the solvent was removed under reduced pressure and reaction mixture was extracted with ethyl acetate and water. The aqueous layer was further extracted twice with ethyl acetate. The combined organic extract was dried over anhydrous sodium sulfate (Na<sub>2</sub>SO<sub>4</sub>), filtered, and concentrated in vacuo to yield the crude product. The residue was then purified by silica gel column chromatography using a gradient of ethyl acetate and hexane as the eluent, affording the desired *benzoxazole-2-carboxylates* (**5a–o**)

## Characterization details of Benzoxazole-2-carboxylates (5a–o)

**Benzyl benzo[d]oxazole-2-carboxylate (5a):** Brown solid; **Yield** 0.177 g (70%); mp 73-75 °C. **<sup>1</sup>H**

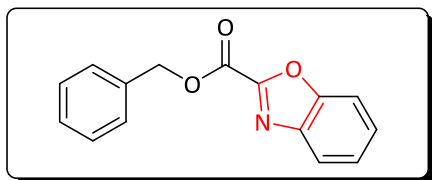

**NMR** (600 MHz, CDCl<sub>3</sub>): δ 7.87 (dt, *J* = 8.0, 1.0 Hz, 1H, Ar-H), 7.63 (dt, *J* = 8.3, 0.9 Hz, 1H, Ar-H), 7.54 – 7.47 (m, 3H, Ar-H), 7.46 – 7.33 (m, 4H, Ar-H), 5.50 (s, 2H, Ar-CH<sub>2</sub>). **<sup>13</sup>C NMR** (151 MHz, CDCl<sub>3</sub>): δ 156.5, 152.7, 151.0,

140.6, 134.5, 129.1, 129.0, 128.9, 128.3, 128.3, 125.9, 122.3, 122.2, 111.8, 68.7. **HRMS** (ESI-TOF) *m/z*: [M + H]<sup>+</sup> calcd for C<sub>15</sub>H<sub>12</sub>NO<sub>3</sub> 254.0817; found 254.0814

**3-methylbenzyl benzo[d]oxazole-2-carboxylate (5b):** Brown solid; **Yield** 0.178 g (67%); mp 90-

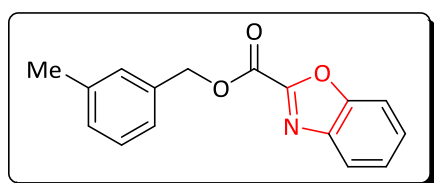

92 °C. **<sup>1</sup>H NMR** (600 MHz, CDCl<sub>3</sub>): δ 7.88 (ddd, *J* = 8.1, 1.3, 0.7 Hz, 1H, Ar-H), 7.64 (dt, *J* = 8.3, 0.9 Hz, 1H, Ar-H), 7.51 (ddd, *J* = 8.4, 7.3, 1.3 Hz, 1H, Ar-H), 7.44 (ddd, *J* = 8.3, 7.3, 1.1 Hz, 1H, Ar-H), 7.25 (s, 3H, Ar-H), 7.17 (ddt,

*J* = 7.1, 1.7, 0.9 Hz, 1H, Ar-H), 5.47 (s, 2H, Ar-CH<sub>2</sub>), 2.36 (s, 3H, CH<sub>3</sub>). **<sup>13</sup>C NMR** (151 MHz, CDCl<sub>3</sub>): δ 156.5, 152.7, 151.0, 140.6, 138.6, 134.4, 129.8, 129.8, 128.8, 128.3, 126.2, 125.9, 122.3, 111.8, 68.8, 21.4. **HRMS** (ESI-TOF) *m/z*: [M + H]<sup>+</sup> calcd for C<sub>16</sub>H<sub>14</sub>NO<sub>3</sub> 268.0974; found 268.0977

**4-methylbenzyl benzo[d]oxazole-2-carboxylate (5c):** Brown solid; **Yield** 0.181 g (68%); mp 95-

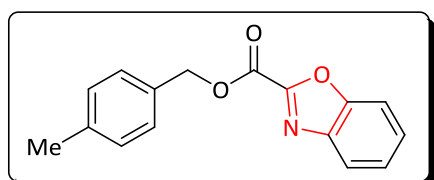

97 °C. **<sup>1</sup>H NMR** (600 MHz, CDCl<sub>3</sub>): δ 7.87 (ddd, *J* = 8.0, 1.2, 0.7 Hz, 1H, Ar-H), 7.64 (dt, *J* = 8.3, 0.9 Hz, 1H, Ar-H), 7.51 (ddd, *J* = 8.4, 7.3, 1.3 Hz, 1H, Ar-H), 7.45 – 7.42 (m, 1H, Ar-H), 7.40 (d, *J* = 8.0 Hz, 2H, Ar-H), 7.19 (d, *J* =

7.6 Hz, 2H, Ar-H), 5.46 (s, 2H, Ar-CH<sub>2</sub>), 2.35 (s, 3H, CH<sub>3</sub>). **<sup>13</sup>C NMR** (151 MHz, CDCl<sub>3</sub>): δ 156.5, 152.8, 151.0, 140.6, 139.0, 131.5, 129.5, 129.3, 128.3, 125.9, 122.3, 111.8, 68.7, 21.4.

**HRMS** (ESI-TOF) *m/z*: [M + H]<sup>+</sup> calcd for C<sub>16</sub>H<sub>14</sub>NO<sub>3</sub> 268.0974; found 268.0979

**2-methoxybenzyl benzo[d]oxazole-2-carboxylate (5d):** Gummy solid; **Yield** 0.189 g (67%); mp

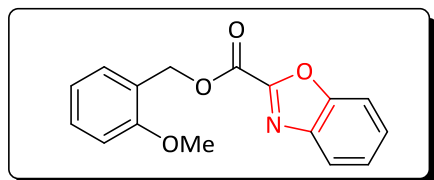

110-112 °C. **<sup>1</sup>H NMR** (600 MHz, CDCl<sub>3</sub>): δ 7.87 (dt, *J* = 7.9, 0.9 Hz, 1H, Ar-H), 7.64 (dt, *J* = 8.4, 0.9 Hz, 1H, Ar-H), 7.54 – 7.48 (m, 1H, Ar-H), 7.47 – 7.42 (m, 2H, Ar-H), 7.34 (ddd, *J* = 8.3, 7.5, 1.8 Hz, 1H, Ar-H), 6.97 (td, *J* = 7.5,

1.0 Hz, 1H, Ar-H), 6.91 (dd, *J* = 8.3, 1.0 Hz, 1H, Ar-H), 5.56 (s, 2H, Ar-CH<sub>2</sub>), 3.85 (s, 3H, OCH<sub>3</sub>). **<sup>13</sup>C NMR** (151 MHz, CDCl<sub>3</sub>): δ 158.0, 156.6, 152.9, 151.0, 140.7, 130.7, 130.4, 128.2, 125.8, 122.8, 122.2, 120.6, 111.8, 110.7, 64.4, 55.6. **HRMS** (ESI-TOF) *m/z*: [M + H]<sup>+</sup> calcd for C<sub>16</sub>H<sub>14</sub>NO<sub>4</sub> 284.0923; found 284.0919

**4-methoxybenzyl benzo[d]oxazole-2-carboxylate (5e):** Brown solid; **Yield** 0.186 g (66%); mp

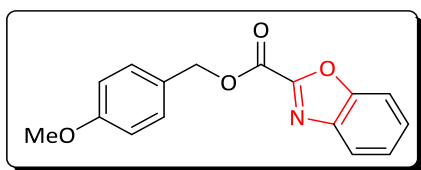

100-102 °C. **<sup>1</sup>H NMR** (600 MHz, CDCl<sub>3</sub>): δ 7.42 (m, 1H, Ar-H), 7.35 (m, 1H, Ar-H), 7.30 (d, *J* = 7.6 Hz, 2H, Ar-H), 7.03-6.95 (m, 1H, Ar-H), 6.88 (m, 3H, Ar-H), 5.41 (s, 2H, Ar-CH<sub>2</sub>), 3.80 (s, 3H, OCH<sub>3</sub>). **<sup>13</sup>C NMR** (151 MHz, CDCl<sub>3</sub>):

δ 159.8, 156.8, 131.0, 130.9, 130.2, 128.4, 127.3, 127.0, 114.6, 114.4, 114.1, 114.0, 66.9, 55.5.

**HRMS** (ESI-TOF) *m/z*: [M + H]<sup>+</sup> calcd for C<sub>16</sub>H<sub>14</sub>NO<sub>4</sub> 284.0923; found 284.0921

**4-fluorobenzyl benzo[d]oxazole-2-carboxylate (5f):** Brown solid; **Yield** 0.176 g (65%); mp 85-

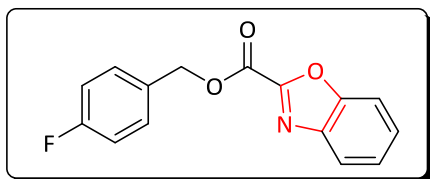

87 °C. **<sup>1</sup>H NMR** (600 MHz, CDCl<sub>3</sub>): δ 7.88 (dt, *J* = 8.0, 1.0 Hz, 1H, Ar-H), 7.64 (dt, *J* = 8.2, 0.9 Hz, 1H, Ar-H), 7.55 – 7.41 (m, 4H, Ar-H), 7.08 (t, *J* = 8.7 Hz, 2H, Ar-H), 5.46 (s, 2H, Ar-CH<sub>2</sub>). **<sup>13</sup>C NMR** (151 MHz, CDCl<sub>3</sub>): δ 163.2 (d, *J* =

247.9 Hz), 156.4, 152.6, 151.0, 140.6, 131.2 (d, *J* = 8.3 Hz), 130.37 (d, *J* = 3.5 Hz), 128.4, 125.9, 122.3, 115.9 (d, *J* = 21.7 Hz), 111.9 68.0. **HRMS** (ESI-TOF) *m/z*: [M + H]<sup>+</sup> calcd for C<sub>15</sub>H<sub>11</sub>FNO<sub>3</sub> 272.0723; found 272.0725

**4-(trifluoromethyl)benzyl benzo[d]oxazole-2-carboxylate (5g):** Brown solid; **Yield** 0.202 g

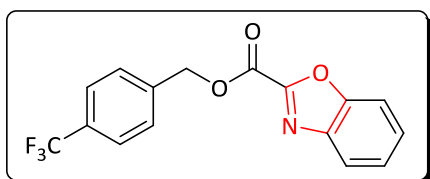

(63%); mp 90-92 °C. **<sup>1</sup>H NMR** (400 MHz, CDCl<sub>3</sub>): δ 7.93 (dt, *J* = 7.9, 1.1 Hz, 1H, Ar-H), 7.73 – 7.63 (m, 5H, Ar-H), 7.57 (ddd, *J* = 8.4, 7.4, 1.3 Hz, 1H, Ar-H), 7.49 (td, *J* = 7.7, 1.2 Hz, 1H, Ar-H), 5.59 (s, 2H, Ar-CH<sub>2</sub>). **<sup>13</sup>C NMR** (101

MHz, CDCl<sub>3</sub>): δ 156.2, 152.3, 151.0, 140.5, 138.3, 131.3, 128.9, 128.4, 125.9, 125.8 (d, *J* = 3.8 Hz), 122.3, 117.8, 111.8, 67.5. (The outer lines of the expected quartets and the large <sup>1</sup>J(C-F) coupling were not clearly observed, likely due to their low intensity). **HRMS** (ESI-TOF) *m/z*: [M + H]<sup>+</sup> calcd for C<sub>16</sub>H<sub>11</sub>F<sub>3</sub>NO<sub>3</sub> 322.0691; found 322.0696.

**4-chlorobenzyl benzo[d]oxazole-2-carboxylate (5h):** Brown solid; **Yield** 0.185 g (65%); mp 97-

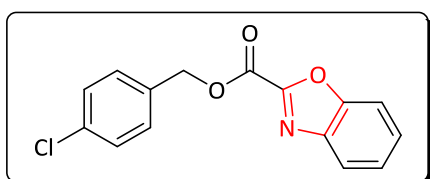

100 °C. **<sup>1</sup>H NMR** (600 MHz, CDCl<sub>3</sub>): δ 7.88 (ddd, *J* = 8.1, 1.2, 0.7 Hz, 1H, Ar-H), 7.65 (dt, *J* = 8.3, 0.9 Hz, 1H, Ar-H), 7.55 – 7.49 (m, 3H, Ar-H), 7.45 (ddd, *J* = 8.3, 7.3, 1.1 Hz, 1H, Ar-H), 7.38 (d, *J* = 8.4 Hz, 2H, Ar-H), 5.45 (s, 2H, Ar-CH<sub>2</sub>).

**<sup>13</sup>C NMR** (151 MHz, CDCl<sub>3</sub>): δ 156.4, 152.5, 151.0, 140.6, 133.5, 132.1, 130.7, 128.5, 126.0, 123.2, 122.3, 111.9, 67.9. **HRMS** (ESI-TOF) *m/z*: [M + H]<sup>+</sup> calcd for C<sub>15</sub>H<sub>11</sub>ClNO<sub>3</sub> 288.0427; found 288.0431

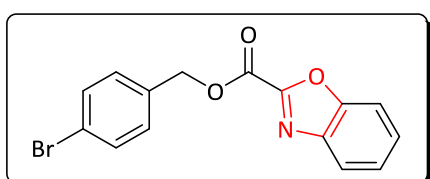

**4-bromobenzyl benzo[d]oxazole-2-carboxylate (5i):**

Brown solid; **Yield** 0.217 g (66%); mp 100-102 °C. **<sup>1</sup>H NMR** (600 MHz, CDCl<sub>3</sub>): δ 7.88 (ddd, *J* = 8.1, 1.2, 0.7 Hz,

1H, Ar-H), 7.65 (dt,  $J = 8.3, 0.9$  Hz, 1H, Ar-H), 7.57 – 7.48 (m, 3H, Ar-H), 7.45 (ddd,  $J = 8.3, 7.3, 1.1$  Hz, 1H, Ar-H), 7.38 (d,  $J = 8.4$  Hz, 2H, Ar-H), 5.45 (s, 2H, Ar-CH<sub>2</sub>). <sup>13</sup>C NMR (151 MHz, CDCl<sub>3</sub>):  $\delta$  156.4, 152.5, 151.0, 140.6, 133.5, 132.1, 130.7, 128.4, 126.0, 123.2, 122.3, 111.9, 67.9. HRMS (ESI-TOF)  $m/z$ : [M + H]<sup>+</sup> calcd for C<sub>15</sub>H<sub>11</sub>BrNO<sub>3</sub> 331.9922; found 331.9925

**4-nitrobenzyl benzo[d]oxazole-2-carboxylate (5j):** Brown solid; Yield 0.184 g (62%); mp 117-

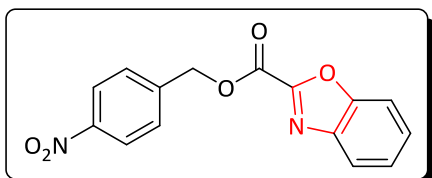

119 °C. <sup>1</sup>H NMR (400 MHz, CDCl<sub>3</sub>):  $\delta$  8.29 – 8.23 (m, 1H, Ar-H), 7.97 (dd,  $J = 7.8, 1.6$  Hz, 1H, Ar-H), 7.65 (q,  $J = 8.4$  Hz, 4H, Ar-H), 7.60 – 7.50 (m, 2H, Ar-H), 5.56 (s, 2H, Ar-CH<sub>2</sub>). <sup>13</sup>C NMR (101 MHz, CDCl<sub>3</sub>):  $\delta$  160.4, 157.5, 153.2, 138.8, 136.8, 128.7, 127.8, 127.2, 125.7, 125.7, 125.6, 122.1, 67.3. HRMS (ESI-TOF)  $m/z$ : [M + H]<sup>+</sup> calcd for C<sub>15</sub>H<sub>11</sub>N<sub>2</sub>O<sub>5</sub> 299.0668; found 299.0672

**Butyl benzo[d]oxazole-2-carboxylate (5k):** Brown solid; Yield 0.148 g (68%); mp 135-137 °C.

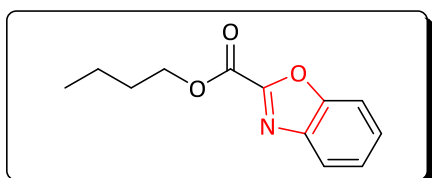

<sup>1</sup>H NMR (600 MHz, CDCl<sub>3</sub>):  $\delta$  7.89 (ddd,  $J = 8.0, 1.2, 0.7$  Hz, 1H, Ar-H), 7.65 (dt,  $J = 8.2, 1.0$  Hz, 1H, Ar-H), 7.51 (ddd,  $J = 8.4, 7.3, 1.3$  Hz, 1H, Ar-H), 7.44 (ddd,  $J = 8.3, 7.4, 1.1$  Hz, 1H, Ar-H), 4.49 (t,  $J = 6.8$  Hz, 2H, CH<sub>2</sub>), 1.87 – 1.79 (m, 2H, CH<sub>2</sub>), 1.49 (h,  $J = 7.4$  Hz, 2H, CH<sub>2</sub>), 0.98 (t,  $J = 7.4$  Hz, 3H, CH<sub>3</sub>). <sup>13</sup>C NMR (151 MHz, CDCl<sub>3</sub>):  $\delta$  156.7, 152.9, 151.0, 140.6, 128.2, 125.8, 122.3, 111.8, 67.2, 30.6, 19.1, 13.7. HRMS (ESI-TOF)  $m/z$ : [M + H]<sup>+</sup> calcd for C<sub>12</sub>H<sub>14</sub>NO<sub>3</sub> 220.0974; found 220.0970

**3-methylcyclohexyl benzo[d]oxazole-2-carboxylate (5l):** Brown gummy solid; Yield 0.173 g

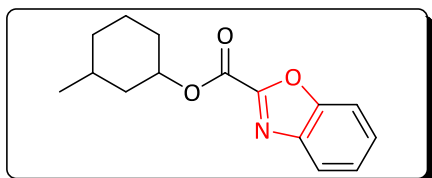

(67%); mp 110-112 °C. <sup>1</sup>H NMR (600 MHz, CDCl<sub>3</sub>):  $\delta$  7.88 (ddt,  $J = 8.1, 7.2, 1.1$  Hz, 1H, Ar-H), 7.64 (dt,  $J = 8.3, 0.9$  Hz, 1H, Ar-H), 7.49 (ddd,  $J = 8.3, 7.3, 1.2$  Hz, 1H, Ar-H), 7.42 (ddd,  $J = 8.2, 7.4, 1.1$  Hz, 1H, Ar-H), 5.44 (p,  $J = 3.6$  Hz, 1H, CH), 2.26 – 1.89 (m, 2H, CH<sub>2</sub>), 1.87 – 1.53 (m, 4H, CH<sub>2</sub>), 1.52 – 1.19 (m, 2H, CH<sub>2</sub>), 1.09 – 0.98 (m, 1H, CH), 0.91 (d,  $J = 6.8$  Hz, 3H, CH<sub>3</sub>). <sup>13</sup>C NMR (151 MHz, CDCl<sub>3</sub>):  $\delta$  156.2, 153.3, 150.9, 140.8, 128.0, 125.7, 122.2, 111.8, 74.3, 38.2, 33.9, 29.9, 27.1, 22.0, 20.7. HRMS (ESI-TOF)  $m/z$ : [M + H]<sup>+</sup> calcd for C<sub>15</sub>H<sub>18</sub>NO<sub>3</sub> 260.1287; found 260.1290

**2-chloro-6-fluorobenzyl benzo[d]oxazole-2-carboxylate (5m):** Brown solid; Yield 0.197 g

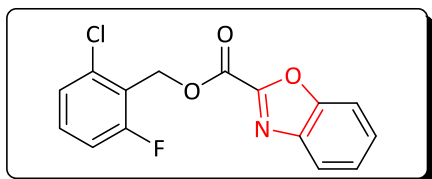

(65%); mp 87-90 °C. <sup>1</sup>H NMR (600 MHz, CDCl<sub>3</sub>):  $\delta$  7.87 (ddd,  $J = 8.1, 1.2, 0.7$  Hz, 1H, Ar-H), 7.64 (dt,  $J = 8.3, 0.9$  Hz, 1H, Ar-H), 7.51 (ddd,  $J = 8.4, 7.3, 1.2$  Hz, 1H, Ar-H), 7.43 (ddd,  $J = 8.2, 7.3, 1.0$  Hz, 1H, Ar-H), 7.33 (td,  $J = 8.3, 6.0$  Hz, 1H, Ar-H), 7.26 (t,  $J = 1.1$  Hz, 1H, Ar-H), 7.06 (ddd,  $J = 9.4, 8.5, 1.2$  Hz, 1H, Ar-H), 5.67 (d,  $J = 4.4$  Hz, Ar-CH<sub>2</sub>). <sup>13</sup>C NMR (151 MHz, CDCl<sub>3</sub>):  $\delta$  162.4 (d,  $J = 253.0$  Hz), 156.3, 152.4, 151.0, 140.6, 136.9 (d,  $J = 4.6$  Hz), 131.6 (d,  $J = 9.8$  Hz), 128.4, 125.9, 125.7 (d,  $J = 3.5$

Hz), 122.3, 120.4 (d,  $J = 16.6$  Hz), 114.6 (d,  $J = 22.4$  Hz), 111.9, 59.6 (d,  $J = 4.7$  Hz). **HRMS** (ESI-TOF)  $m/z$ :  $[M + H]^+$  calcd for  $C_{15}H_{10}ClFNO_3$  306.0333; found 306.0337

**Benzyl 5-methylbenzo[d]oxazole-2-carboxylate (5n)**: Brown solid; Yield 0.170 g (64%); mp

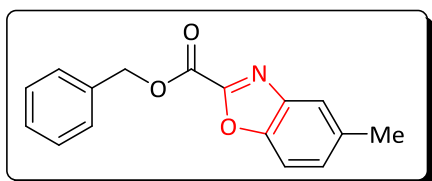

110-112 °C.  **$^1H$  NMR** (400 MHz,  $CDCl_3$ ):  $\delta$  7.70 – 7.65 (m, 1H, Ar-H), 7.54 (d,  $J = 8.4$  Hz, 3H, Ar-H), 7.46 – 7.38 (m, 3H, Ar-H), 7.35 (dd,  $J = 8.5, 1.7$  Hz, 1H, Ar-H), 5.53 (s, 2H, Ar- $CH_2$ ), 2.52 (s, 3H,  $CH_3$ ).  **$^{13}C$  NMR** (101 MHz,  $CDCl_3$ ):  $\delta$  156.5, 152.6, 149.2, 140.8, 135.9, 134.5, 129.7, 129.0, 128.9, 128.8, 121.7, 111.1, 68.6, 21.5. **HRMS** (ESI-TOF)  $m/z$ :  $[M + H]^+$  calcd for  $C_{16}H_{14}NO_3$  268.0974; found 268.0979

**Benzyl 5-nitrobenzo[d]oxazole-2-carboxylate (5o)**: Brown solid; Yield 0.178 g (60%); mp 130-

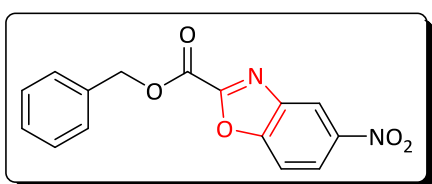

132 °C.  **$^1H$  NMR** (400 MHz,  $CDCl_3$ ):  $\delta$  8.81 (d,  $J = 2.3$  Hz, 1H, Ar-H), 8.50 (dd,  $J = 9.1, 2.3$  Hz, 1H, Ar-H), 7.82 (d,  $J = 9.0$  Hz, 1H, Ar-H), 7.58 – 7.50 (m, 2H, Ar-H), 7.50 – 7.33 (m, 3H, Ar-H), 5.57 (s, 2H, Ar- $CH_2$ ).  **$^{13}C$  NMR** (101 MHz,  $CDCl_3$ ):  $\delta$  155.5, 155.2, 154.0, 146.2, 140.8, 133.9, 129.2, 129.1, 128.9, 123.8, 118.7, 112.3, 69.3. **HRMS** (ESI-TOF)  $m/z$ :  $[M + H]^+$  calcd for  $C_{15}H_{11}N_2O_5$  299.0668; found 299.0672

## General Procedure for the Synthesis of Benzothiazole-2-carboxylates (6a–m)

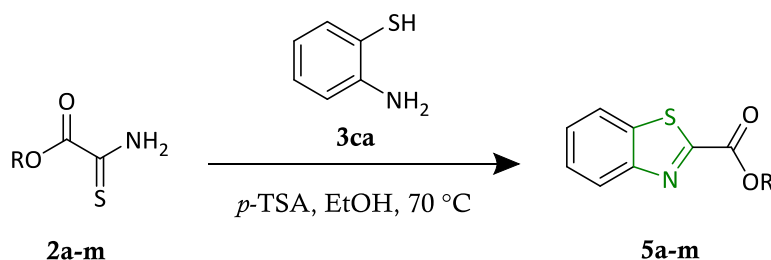

**Reaction condition:** **2a–m** (1 mmol, 1 equiv.), **3ca** (1 mmol, 1 equiv.), *p*-TSA (0.1 mmol, 0.1 equiv.), EtOH (4 mL), 70 °C, 11 h.

To a solution of *alkyl/arylmethyl thiooxamates* **2a–m** (1.0 mmol, 1.0 equiv.) and *ortho-aminothiophenol* **3ca** (1.0 mmol, 1.0 equiv.) in ethanol (4 mL), *para*-toluenesulfonic acid (*p*-TSA) (0.1 mmol, 0.1 equiv.) was added. The resulting mixture was stirred at 70 °C in oil bath for 11 hours with continuous magnetic confrontation. The reaction progress was monitored by thin-layer chromatography (TLC). Upon completion, the solvent was removed under reduced pressure and reaction mixture was extracted with ethyl acetate and water. The aqueous layer was further extracted twice with ethyl acetate. The combined organic extract was dried over anhydrous sodium sulfate (Na<sub>2</sub>SO<sub>4</sub>), filtered, and concentrated in vacuo to yield the crude product. The residue was then purified by silica gel column chromatography using a gradient of ethyl acetate and hexane as the eluent, affording the desired *benzothiazole-2-carboxylates* (**6a–m**)

## Characterization details of Benzothiazole-2-carboxylates (6a–m)

**Benzyl benzo[d]thiazole-2-carboxylate (6a):** White solid; **Yield** 0.196 g (73%); mp 65-67 °C. <sup>1</sup>H

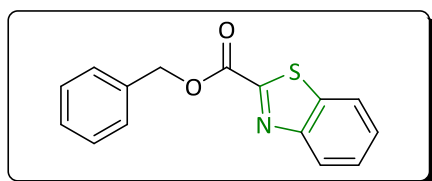

**NMR** (600 MHz, CDCl<sub>3</sub>): δ 8.26 – 8.21 (m, 1H, Ar-H), 7.95 (td, *J* = 7.9, 0.7 Hz, 1H, Ar-H), 7.61 – 7.49 (m, 4H, Ar-H), 7.42 – 7.32 (m, 3H, Ar-H), 5.50 (s, 2H, Ar-CH<sub>2</sub>).

<sup>13</sup>C **NMR** (151 MHz, CDCl<sub>3</sub>): δ 160.6, 158.1, 153.3, 136.9, 134.9, 128.9, 128.9, 128.8, 127.7, 127.2, 125.7, 122.2, 68.6. **HRMS** (ESI-TOF) *m/z*: [M + H]<sup>+</sup> calcd for C<sub>15</sub>H<sub>12</sub>NO<sub>2</sub>S 270.0589; found 270.0593

**3-methylbenzyl benzo[d]thiazole-2-carboxylate (6b):** White solid; **Yield** 0.192 g (68%); mp 83-

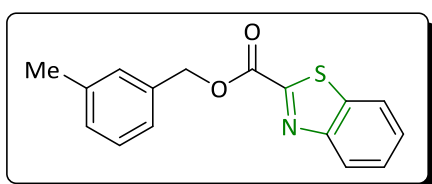

85 °C. <sup>1</sup>H **NMR** (600 MHz, CDCl<sub>3</sub>): δ 8.24 (ddd, *J* = 8.2, 1.3, 0.7 Hz, 1H, Ar-H), 7.95 (ddd, *J* = 7.9, 1.4, 0.7 Hz, 1H, Ar-H), 7.60 – 7.50 (m, 2H, Ar-H), 7.33 – 7.25 (m, 3H, Ar-H), 7.19 – 7.14 (m, 1H, Ar-H), 5.47 (s, 2H, Ar-CH<sub>2</sub>), 2.36

(s, 3H, CH<sub>3</sub>). <sup>13</sup>C **NMR** (151 MHz, CDCl<sub>3</sub>): δ 160.6, 158.2, 153.3, 138.5, 136.9, 134.8, 129.6, 128.7, 127.7, 127.2, 126.0, 125.7, 122.2, 68.7, 21.5. **HRMS** (ESI-TOF) *m/z*: [M + H]<sup>+</sup> calcd for C<sub>16</sub>H<sub>14</sub>NO<sub>2</sub>S 284.0745; found 284.0747

**4-methylbenzyl benzo[d]thiazole-2-carboxylate (6c):** White solid; **Yield** 0.198 g (70%); mp 69-

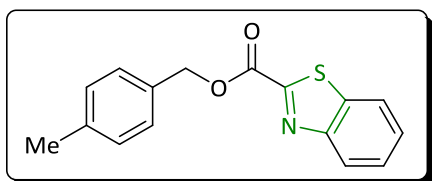

71 °C. <sup>1</sup>H **NMR** (600 MHz, CDCl<sub>3</sub>): δ 8.23 (ddd, *J* = 8.2, 1.3, 0.7 Hz, 1H, Ar-H), 7.94 (ddd, *J* = 8.0, 1.4, 0.7 Hz, 1H, Ar-H), 7.54 (dddd, *J* = 24.7, 8.3, 7.2, 1.3 Hz, 2H, Ar-H), 7.39 (d, *J* = 8.1 Hz, 2H, Ar-H), 7.19 (d, *J* = 7.6 Hz, 2H, Ar-

H), 5.46 (s, 2H, Ar-CH<sub>2</sub>), 2.35 (s, 3H, CH<sub>3</sub>). <sup>13</sup>C **NMR** (151 MHz, CDCl<sub>3</sub>): δ 160.6, 158.3, 153.3, 138.8, 136.9, 131.9, 129.5, 129.1, 127.7, 127.2, 125.6, 122.2, 68.6, 21.3. **HRMS** (ESI-TOF) *m/z*: [M + H]<sup>+</sup> calcd for C<sub>16</sub>H<sub>14</sub>NO<sub>2</sub>S 284.0745; found 284.0749

**2-methoxybenzyl benzo[d]thiazole-2-carboxylate (6d):** White solid; **Yield** 0.197 g (66%); mp

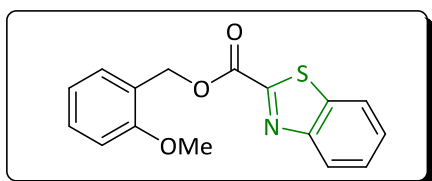

100-101 °C. <sup>1</sup>H **NMR** (600 MHz, CDCl<sub>3</sub>): δ 8.24 (ddd, *J* = 8.2, 1.4, 0.7 Hz, 1H, Ar-H), 7.95 (ddd, *J* = 7.9, 1.4, 0.7 Hz, 1H, Ar-H), 7.54 (dddd, *J* = 24.3, 8.3, 7.1, 1.3 Hz, 2H, Ar-H), 7.45 (dd, *J* = 7.5, 1.7 Hz, 1H, Ar-H), 7.33 (ddd, *J* = 8.2,

7.5, 1.8 Hz, 1H, Ar-H), 6.97 (td, *J* = 7.5, 1.0 Hz, 1H, Ar-H), 6.90 (dd, *J* = 8.4, 1.0 Hz, 1H, Ar-H), 5.56 (s, 2H, Ar-CH<sub>2</sub>), 3.85 (s, 3H, OCH<sub>3</sub>). <sup>13</sup>C **NMR** (151 MHz, CDCl<sub>3</sub>): δ 160.6, 158.4, 157.8, 153.3, 136.9, 130.2, 130.2, 127.6, 127.1, 125.7, 123.3, 122.1, 120.6, 110.6, 64.2, 55.6.

**HRMS** (ESI-TOF) *m/z*: [M + H]<sup>+</sup> calcd for C<sub>16</sub>H<sub>14</sub>NO<sub>3</sub>S 300.0694; found 300.0699

**4-methoxybenzyl benzo[d]thiazole-2-carboxylate (6e):** Gummy solid; **Yield** 0.188 g (63%); mp

110-112 °C. <sup>1</sup>H **NMR** (400 MHz, CDCl<sub>3</sub>): δ 8.30 – 8.23 (m, 1H, Ar-H), 8.01 – 7.95 (m, 1H, Ar-

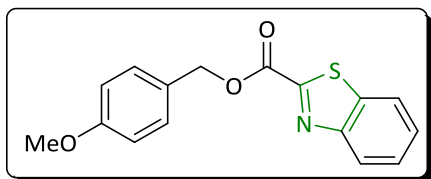

H), 7.64 – 7.51 (m, 2H, Ar-H), 7.48 (d,  $J = 8.7$  Hz, 2H, Ar-H), 6.94 (d,  $J = 8.7$  Hz, 2H, Ar-H), 5.48 (s, 2H, Ar-CH<sub>2</sub>), 3.84 (s, 3H, OCH<sub>3</sub>). <sup>13</sup>C NMR (101 MHz, CDCl<sub>3</sub>):  $\delta$  160.6, 160.1, 158.3, 153.2, 136.8, 130.8, 127.6, 127.1, 127.0, 125.6, 122.1, 114.1, 68.4, 55.3. HRMS (ESI-TOF)  $m/z$ : [M + H]<sup>+</sup> calcd for C<sub>16</sub>H<sub>14</sub>NO<sub>3</sub>S 300.0694; found 300.0698

**4-fluorobenzyl benzo[d]thiazole-2-carboxylate (6f):** White solid; Yield 0.192 g (67%); mp 63-

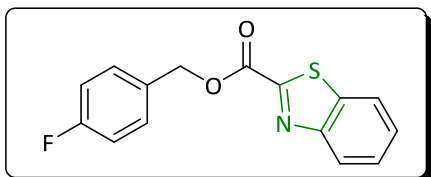

65 °C. <sup>1</sup>H NMR (600 MHz, CDCl<sub>3</sub>):  $\delta$  8.25 – 8.20 (m, 1H, Ar-H), 7.95 (ddd,  $J = 7.9, 1.4, 0.7$  Hz, 1H, Ar-H), 7.59 – 7.45 (m, 4H, Ar-H), 7.06 (t,  $J = 8.7$  Hz, 2H, Ar-H), 5.46 (s, 2H, Ar-CH<sub>2</sub>). <sup>13</sup>C NMR (151 MHz, CDCl<sub>3</sub>):  $\delta$  163.1 (d,  $J = 247.8$  Hz), 160.6, 158.1, 153.3, 136.9, 131.1 (d,  $J = 8.2$  Hz), 130.8 (d,  $J = 3.3$  Hz), 127.8, 127.3, 125.7, 122.2, 115.8 (d,  $J = 21.6$  Hz), 67.9. HRMS (ESI-TOF)  $m/z$ : [M + H]<sup>+</sup> calcd for C<sub>15</sub>H<sub>11</sub>FNO<sub>2</sub>S 288.0495; found 288.0501

**4-(trifluoromethyl)benzyl benzo[d]thiazole-2-carboxylate (6g):** White solid; Yield 0.212 g (63%);

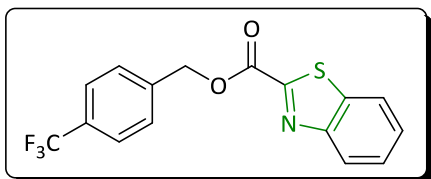

mp 77-79 °C. <sup>1</sup>H NMR (400 MHz, CDCl<sub>3</sub>):  $\delta$  8.29 – 8.23 (m, 1H, Ar-H), 7.97 (dd,  $J = 7.8, 1.5$  Hz, 1H, Ar-H), 7.65 (q,  $J = 8.4$  Hz, 4H, Ar-H), 7.59 – 7.49 (m, 2H, Ar-H), 5.48 (s, 2H, Ar-CH<sub>2</sub>). <sup>13</sup>C NMR (101 MHz, CDCl<sub>3</sub>):  $\delta$  160.4, 157.6, 153.2, 138.8, 136.8, 128.7, 127.8, 127.3, 125.8, 125.7, 125.7 (d,  $J = 3.7$  Hz), 125.6, 122.1, 67.4. (The outer lines of the expected quartets and the large <sup>1</sup>J(C-F) coupling were not clearly observed, likely due to their low intensity). HRMS (ESI-TOF)  $m/z$ : [M + H]<sup>+</sup> calcd for C<sub>16</sub>H<sub>11</sub>F<sub>3</sub>NO<sub>2</sub>S 338.0463; found 338.0466.

**4-chlorobenzyl benzo[d]thiazole-2-carboxylate (6h):** White solid; Yield 0.208 g (69%); mp 80-

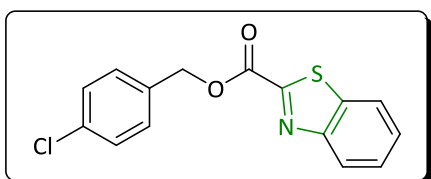

82 °C. <sup>1</sup>H NMR (600 MHz, CDCl<sub>3</sub>):  $\delta$  8.23 (ddd,  $J = 8.2, 1.3, 0.7$  Hz, 1H, Ar-H), 7.95 (ddd,  $J = 7.9, 1.4, 0.7$  Hz, 1H, Ar-H), 7.60 – 7.50 (m, 2H, Ar-H), 7.43 (d,  $J = 8.5$  Hz, 2H, Ar-H), 7.35 (d,  $J = 8.4$  Hz, 2H, Ar-H), 5.45 (s, 2H, Ar-CH<sub>2</sub>). <sup>13</sup>C NMR (151 MHz, CDCl<sub>3</sub>):  $\delta$  160.5, 157.9, 153.3, 136.9, 134.9, 133.4, 130.3, 129.0, 127.8, 127.3, 125.7, 122.2, 67.7. HRMS (ESI-TOF)  $m/z$ : [M + H]<sup>+</sup> calcd for C<sub>15</sub>H<sub>11</sub>ClNO<sub>2</sub>S 304.0199; found 304.0202

**4-bromobenzyl benzo[d]oxazole-2-carboxylate (6i):** White solid; Yield 0.242 g (70%); mp 87-89

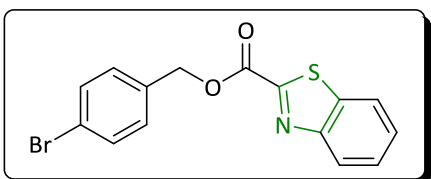

°C. <sup>1</sup>H NMR (600 MHz, CDCl<sub>3</sub>):  $\delta$  8.26 (m, 1H, Ar-H), 7.98 (m, 1H, Ar-H), 7.62– 7.57 (m, 2H, Ar-H), 7.54 (d,  $J = 6.7$  Hz, 2H, Ar-H), 7.40 (d,  $J = 6.8$  Hz, 2H, Ar-H), 5.47 (s, 2H, Ar-CH<sub>2</sub>). <sup>13</sup>C NMR (151 MHz, CDCl<sub>3</sub>):  $\delta$  160.4, 157.8,

153.2, 136.8, 133.8, 131.9, 130.5, 127.7, 127.2, 125.6, 122.9, 122.1, 67.6. **HRMS** (ESI-TOF)  $m/z$ :  $[M + H]^+$  calcd for  $C_{15}H_{11}BrNO_2S$  347.9694; found 347.9697

**4-nitrobenzyl benzo[d]thiazole-2-carboxylate (6j)**: White solid; **Yield** 0.188 g (60%); mp 89-91

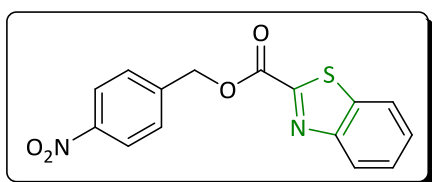

°C.  **$^1H$  NMR** (400 MHz,  $CDCl_3$ ):  $\delta$  8.33 – 8.23 (m, 3H, Ar-H), 8.05 – 7.96 (m, 1H, Ar-H), 7.70 (d,  $J = 8.8$  Hz, 2H, Ar-H), 7.74 – 7.53 (m, 2H, Ar-H), 5.63 (s, 2H, Ar- $CH_2$ ).  **$^{13}C$  NMR** (101 MHz,  $CDCl_3$ ):  $\delta$  160.3, 157.3, 153.2, 148.1, 141.9, 136.9, 128.9, 128.0, 127.4, 125.7, 124.0, 122.2, 66.8. **HRMS** (ESI-TOF)  $m/z$ :  $[M + H]^+$  calcd for  $C_{15}H_{11}N_2O_4S$  315.0440; found 315.0444

**Butyl benzo[d]thiazole-2-carboxylate (6k)**: Brown gummy solid; **Yield** 0.164 g (70%); mp 110-

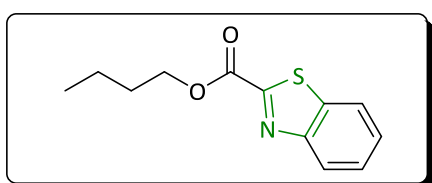

112 °C.  **$^1H$  NMR** (400 MHz,  $CDCl_3$ ):  $\delta$  8.23 (dd,  $J = 7.6$ , 1.4 Hz, 1H, Ar-H), 7.94 (dd,  $J = 8.2$ , 1.3 Hz, 1H, Ar-H), 7.60 – 7.46 (m, 2H, Ar-H), 4.48 (t,  $J = 6.8$  Hz, 2H,  $CH_2$ ), 1.88 – 1.77 (m, 2H,  $CH_2$ ), 1.48 (h,  $J = 7.3$  Hz, 2H,  $CH_2$ ), 0.98 (t,  $J = 7.4$  Hz, 3H,  $CH_3$ ).  **$^{13}C$  NMR** (101 MHz,  $CDCl_3$ ):  $\delta$  160.6, 158.4, 153.2, 136.7, 127.5, 127.1, 125.5, 122.0, 66.9, 30.6, 19.1, 13.7. **HRMS** (ESI-TOF)  $m/z$ :  $[M + H]^+$  calcd for  $C_{12}H_{14}NO_2S$  236.0745; found 236.0741

**3-methylcyclohexyl benzo[d]thiazole-2-carboxylate (6l)**: White solid; **Yield** 0.186 g (68%); mp

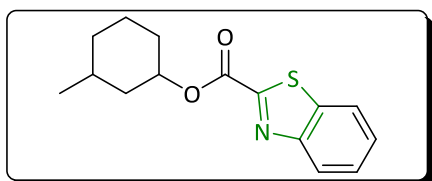

78-80 °C.  **$^1H$  NMR** (600 MHz,  $CDCl_3$ ):  $\delta$  8.24 (ddd,  $J = 8.1$ , 1.3, 0.7 Hz, 1H, Ar-H), 7.94 (ddd,  $J = 7.9$ , 1.4, 0.7 Hz, 1H, Ar-H), 7.73 – 7.43 (m, 2H, Ar-H), 5.38 – 5.01 (m, 1H, CH), 2.24 – 2.08 (m, 2H,  $CH_2$ ), 1.84 (dt,  $J = 13.5$ , 3.3 Hz, 1H, CH), 1.73 – 1.62 (m, 1H, CH), 1.58 – 1.45 (m, 2H,  $CH_2$ ), 1.43 – 1.35 (m, 1H, CH), 1.31 – 1.21 (m, 2H,  $CH_2$ ), 0.96 (d,  $J = 6.5$  Hz, 3H,  $CH_3$ ).  **$^{13}C$  NMR** (151 MHz,  $CDCl_3$ ):  $\delta$  160.2, 159.1, 153.4, 136.8, 127.5, 127.1, 125.6, 122.1, 76.6, 40.3, 33.9, 31.5, 31.4, 24.0, 22.3. **HRMS** (ESI-TOF)  $m/z$ :  $[M + H]^+$  calcd for  $C_{15}H_{18}NO_2S$  276.1058; found 276.1061

**2-chloro-6-fluorobenzyl benzo[d]thiazole-2-carboxylate (6m)**: White solid; **Yield** 0.214 g (67%); mp

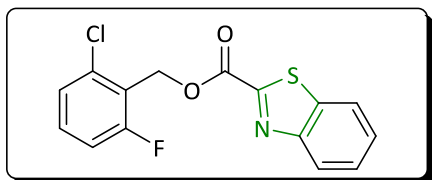

91-93 °C.  **$^1H$  NMR** (600 MHz,  $CDCl_3$ ):  $\delta$  8.22 (ddd,  $J = 8.2$ , 1.4, 0.7 Hz, 1H, Ar-H), 7.93 (ddd,  $J = 7.9$ , 1.4, 0.7 Hz, 1H, Ar-H), 7.57 – 7.48 (m, 2H, Ar-H), 7.31 (td,  $J = 8.2$ , 5.9 Hz, 1H, Ar-H), 7.27 – 7.22 (m, 1H, Ar-H), 7.05 (ddd,  $J = 9.4$ , 8.3, 1.2 Hz, 1H, Ar-H), 5.65 (d,  $J = 1.7$  Hz, 2H, Ar- $CH_2$ ).  **$^{13}C$  NMR** (151 MHz,  $CDCl_3$ ):  $\delta$  162.3 (d,  $J = 252.9$  Hz), 160.4, 157.7, 153.3, 136.9, 136.8 (d,  $J = 4.8$  Hz), 131.4 (d,  $J = 9.6$  Hz), 127.7, 127.2, 125.73, 125.71, 122.1, 120.8 (d,  $J = 17.3$  Hz), 114.5 (d,  $J = 22.4$  Hz), 59.5 (d,  $J = 4.4$  Hz). **HRMS** (ESI-TOF)  $m/z$ :  $[M + H]^+$  calcd for  $C_{15}H_{10}ClFNO_2S$  322.0105; found 322.0111

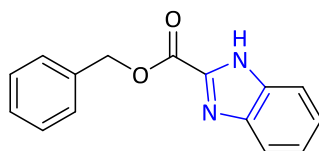

Benzyl 1H-benzo[d]imidazole-2-carboxylate (4a)

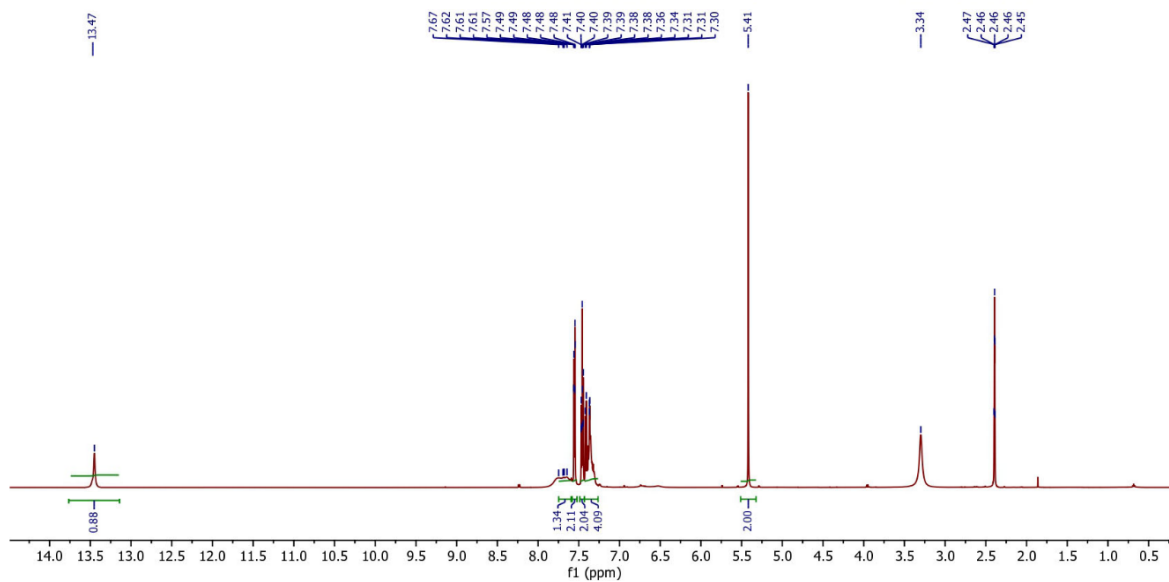

<sup>1</sup>H NMR Spectrum of 4a (600 MHz, DMSO-d<sub>6</sub>)

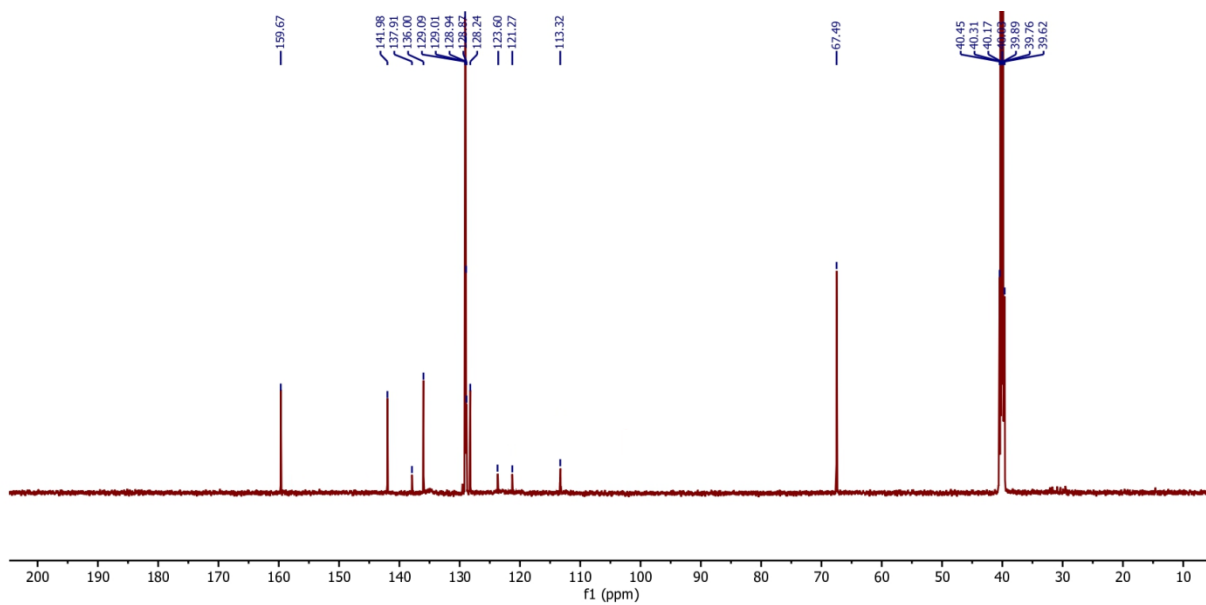

<sup>13</sup>C NMR Spectrum of 4a (151 MHz, DMSO-d<sub>6</sub>)

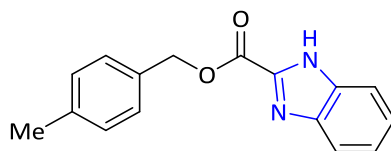

4-methylbenzyl 1H-benzo[d]imidazole-2-carboxylate (**4b**)

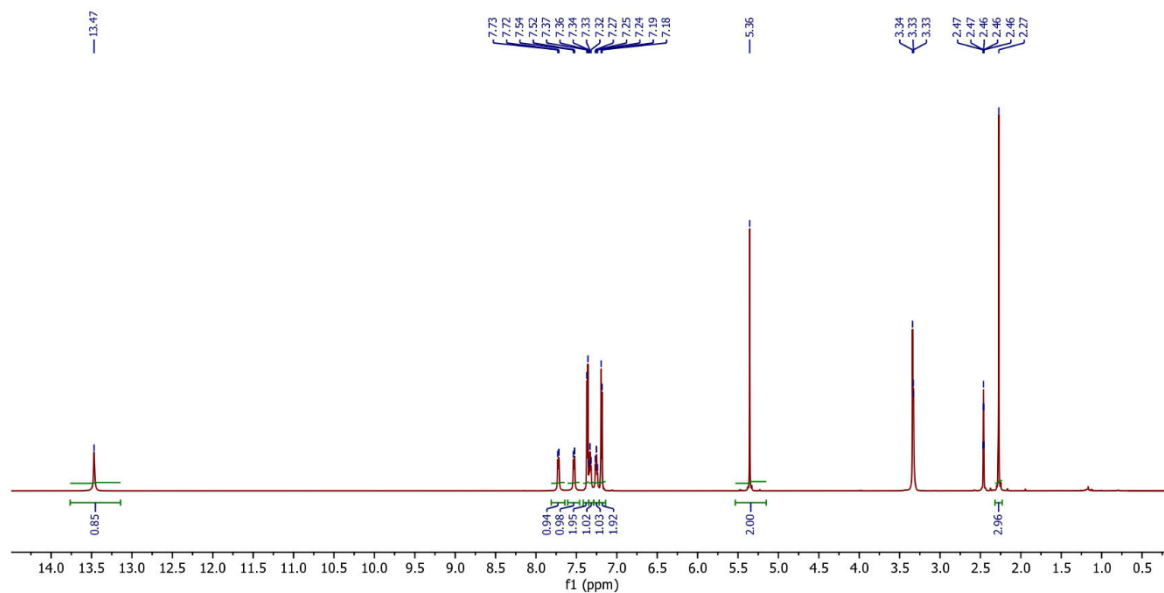

<sup>1</sup>H NMR Spectrum of **4b** (600 MHz, DMSO-d<sub>6</sub>)

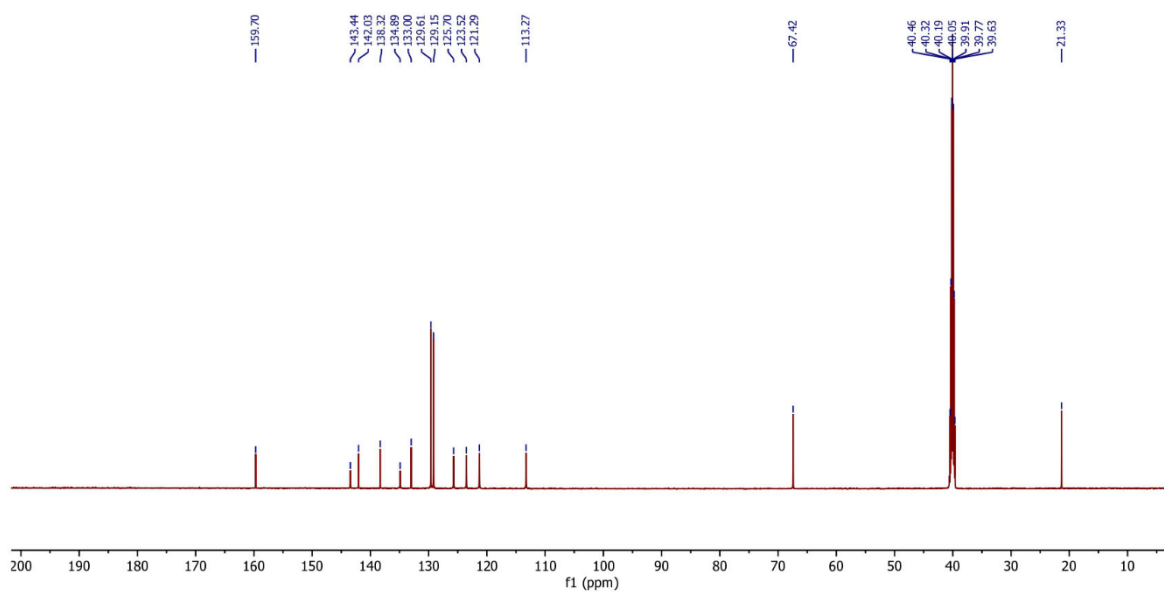

<sup>13</sup>C NMR Spectrum of **4b** (151 MHz, DMSO-d<sub>6</sub>)

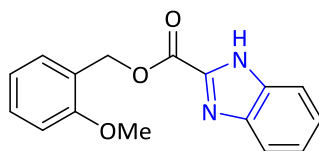

**2-methoxybenzyl 1H-benzo[d]imidazole-2-carboxylate (4c)**

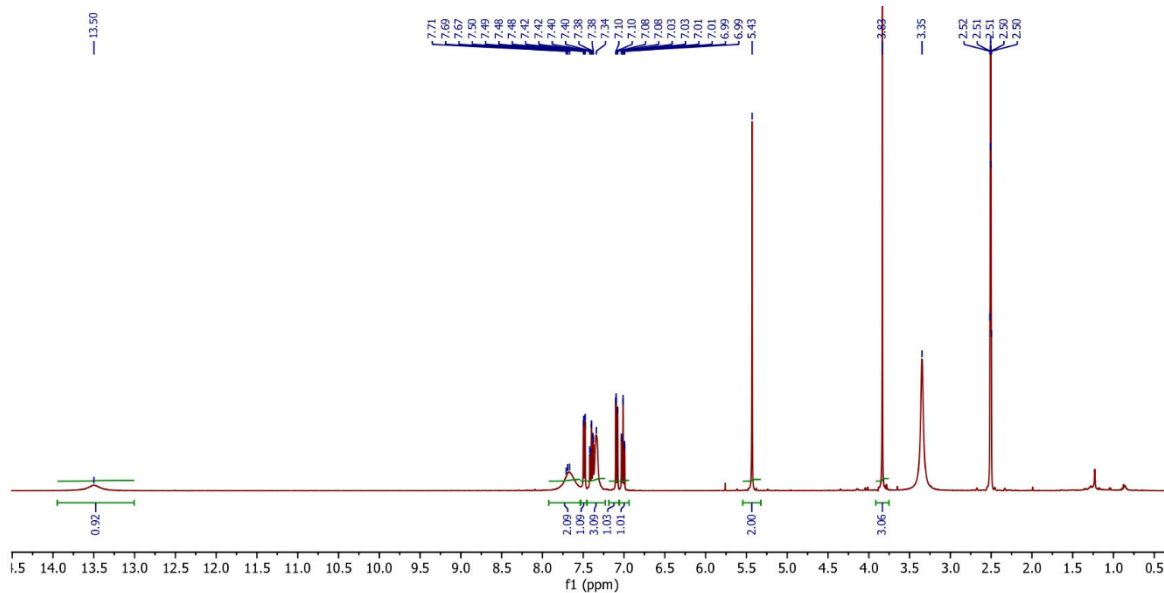

<sup>1</sup>H NMR Spectrum of **4c** (400 MHz, DMSO-d<sub>6</sub>)

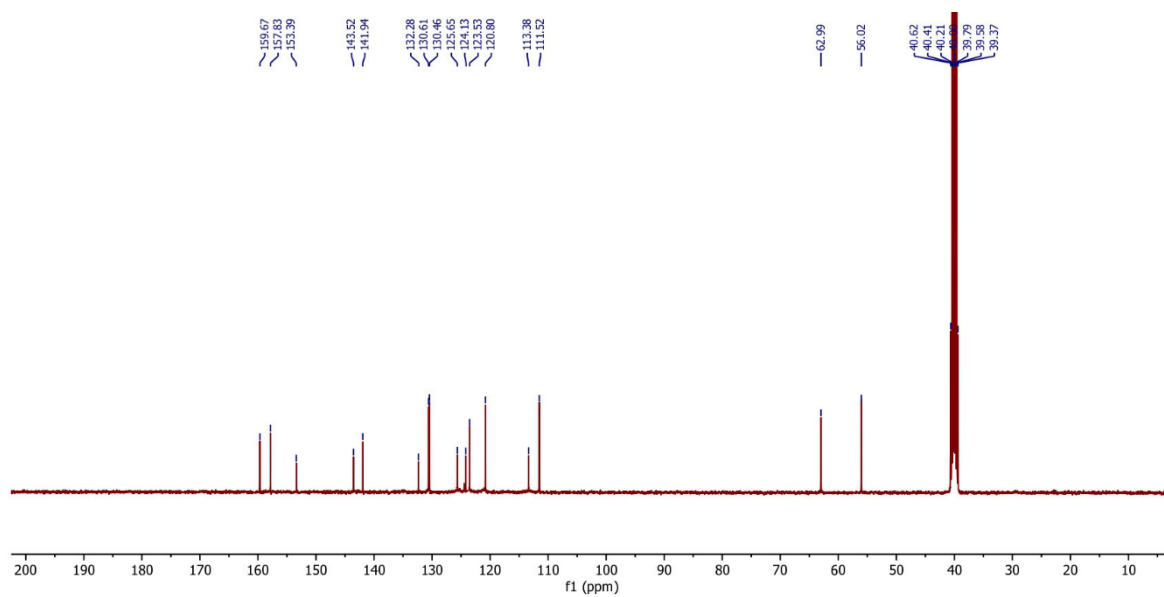

<sup>13</sup>C NMR Spectrum of **4c** (101 MHz, DMSO-d<sub>6</sub>)

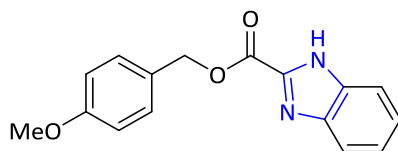

4-methoxybenzyl 1H-benzo[d]imidazole-2-carboxylate (**4d**)

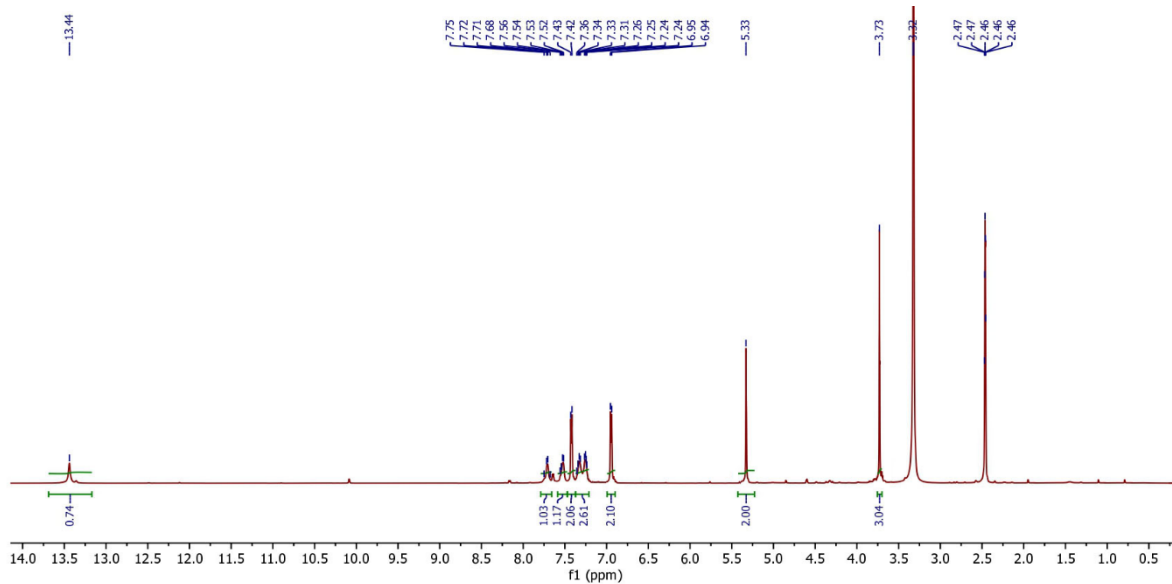

<sup>1</sup>H NMR Spectrum of **4d** (600 MHz, DMSO-d<sub>6</sub>)

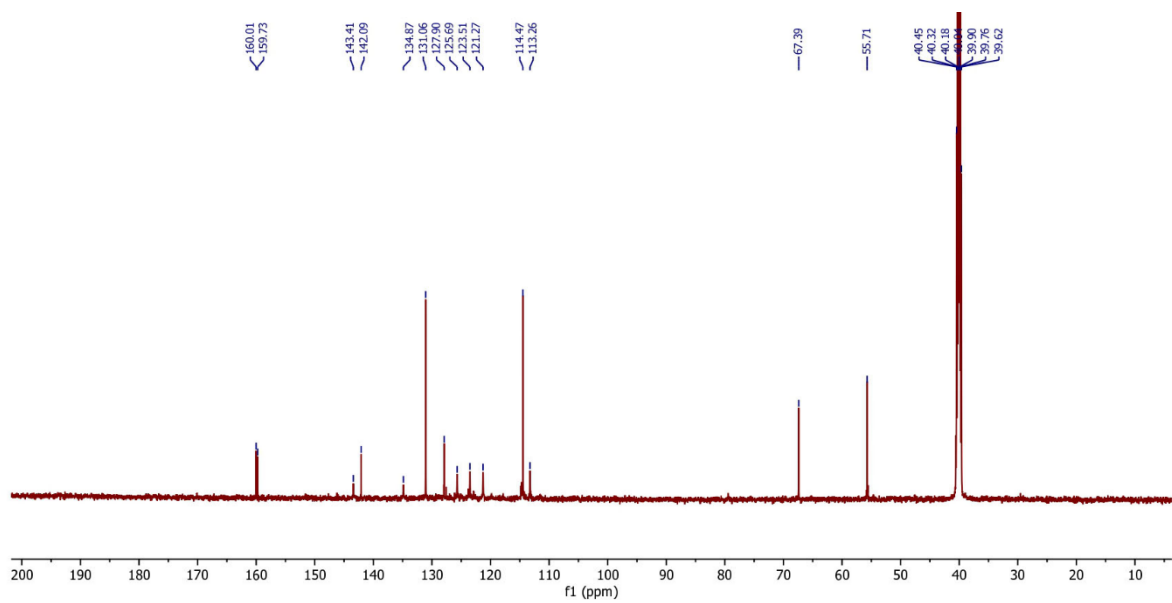

<sup>13</sup>C NMR Spectrum of **4d** (151 MHz, DMSO-d<sub>6</sub>)

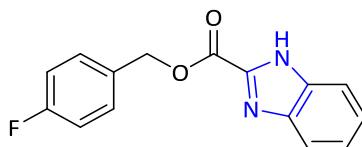

**4-fluorobenzyl 1H-benzo[d]imidazole-2-carboxylate (4e)**

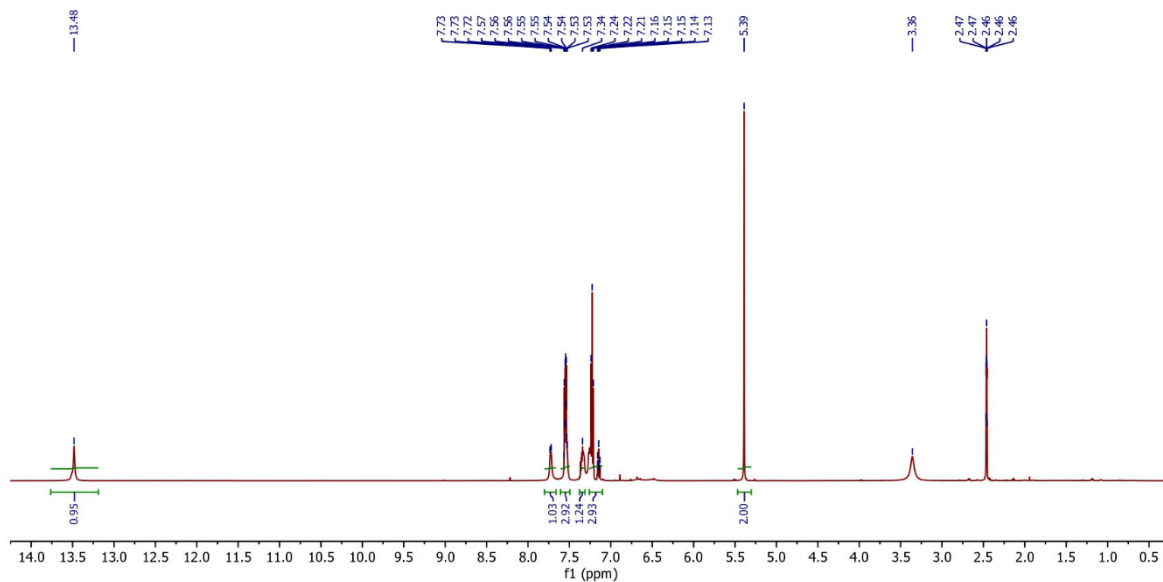

<sup>1</sup>H NMR Spectrum of **4e** (600 MHz, DMSO-d<sub>6</sub>)

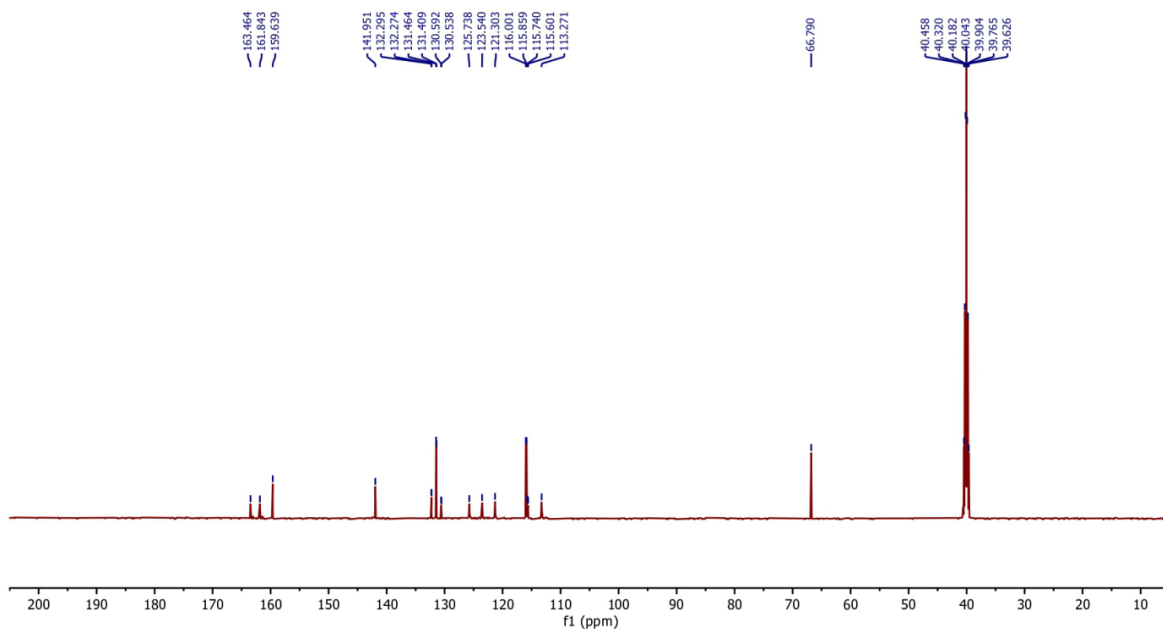

<sup>13</sup>C NMR Spectrum of **4e** (151 MHz, DMSO-d<sub>6</sub>)

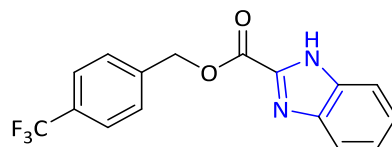

4-(trifluoromethyl)benzyl 1H-benzo[d]imidazole-2-carboxylate (**4f**)

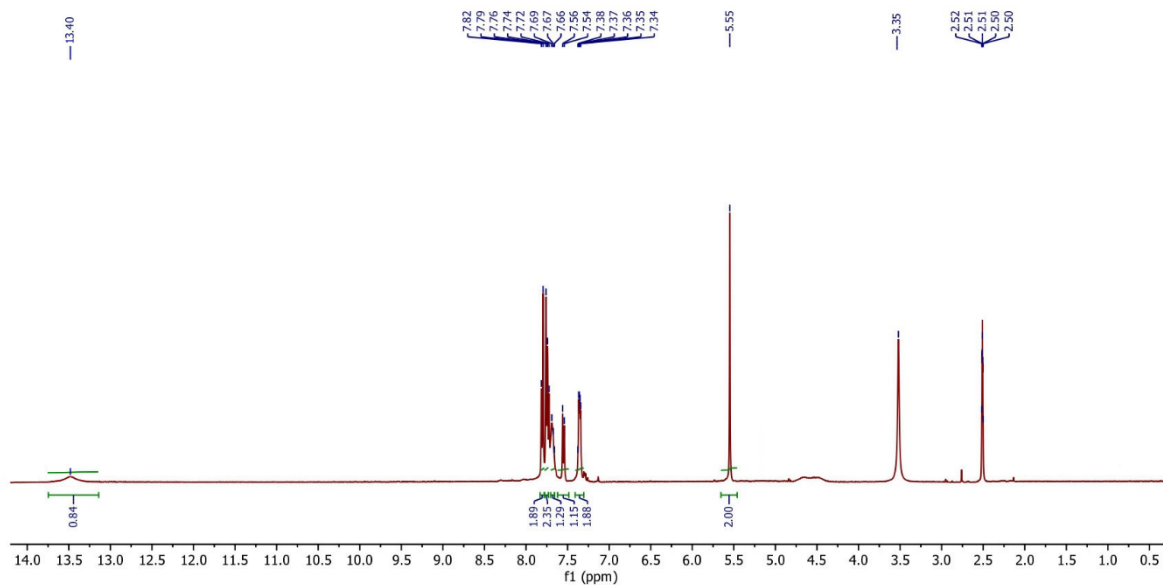

$^1\text{H}$  NMR Spectrum of **4f** (400 MHz,  $\text{DMSO-d}_6$ )

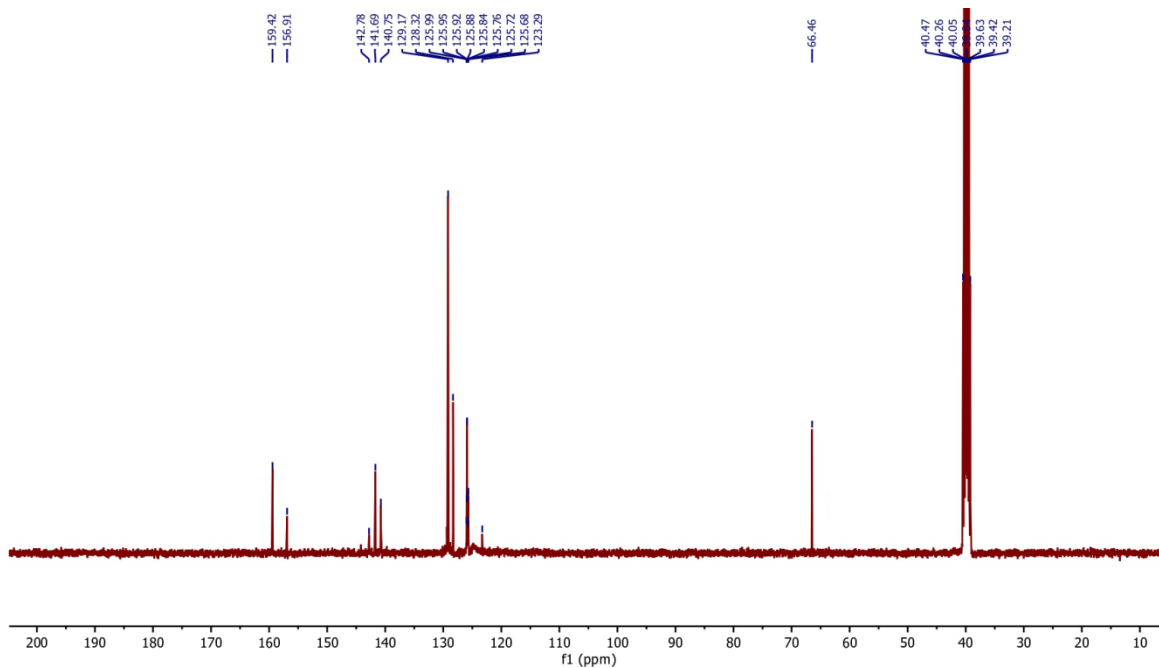

$^{13}\text{C}$  NMR Spectrum of **4f** (101 MHz,  $\text{DMSO-d}_6$ )

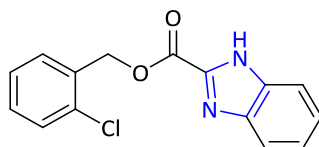

**2-chlorobenzyl 1H-benzo[d]imidazole-2-carboxylate (4g)**

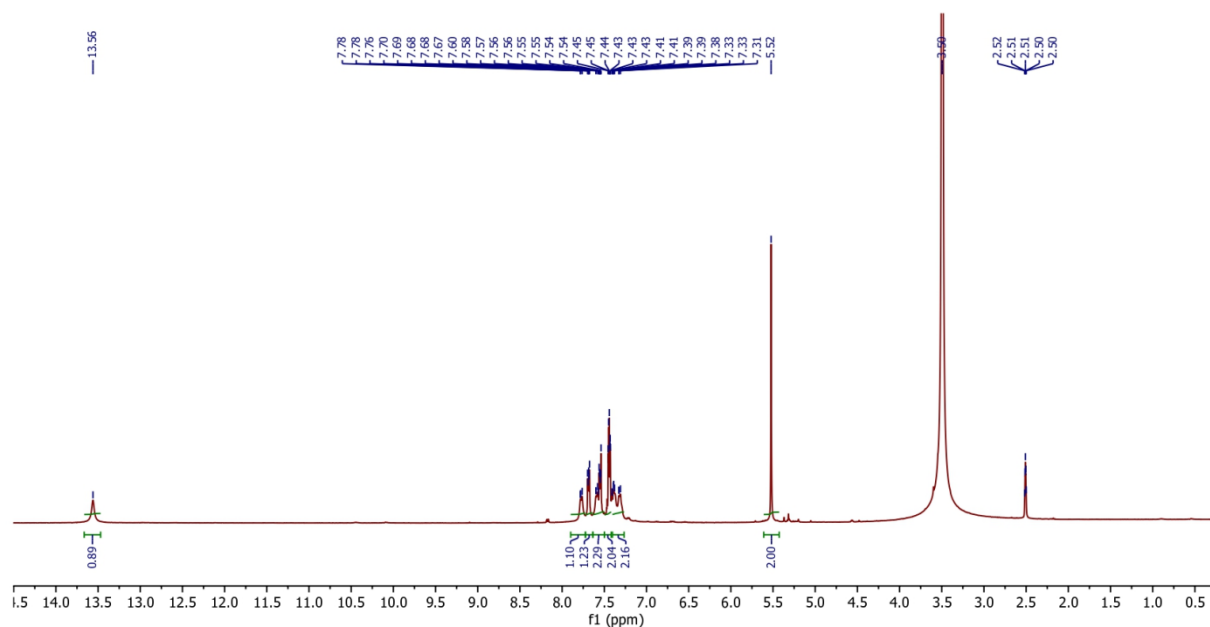

<sup>1</sup>H NMR Spectrum of **4g** (400 MHz, DMSO-d<sub>6</sub>)

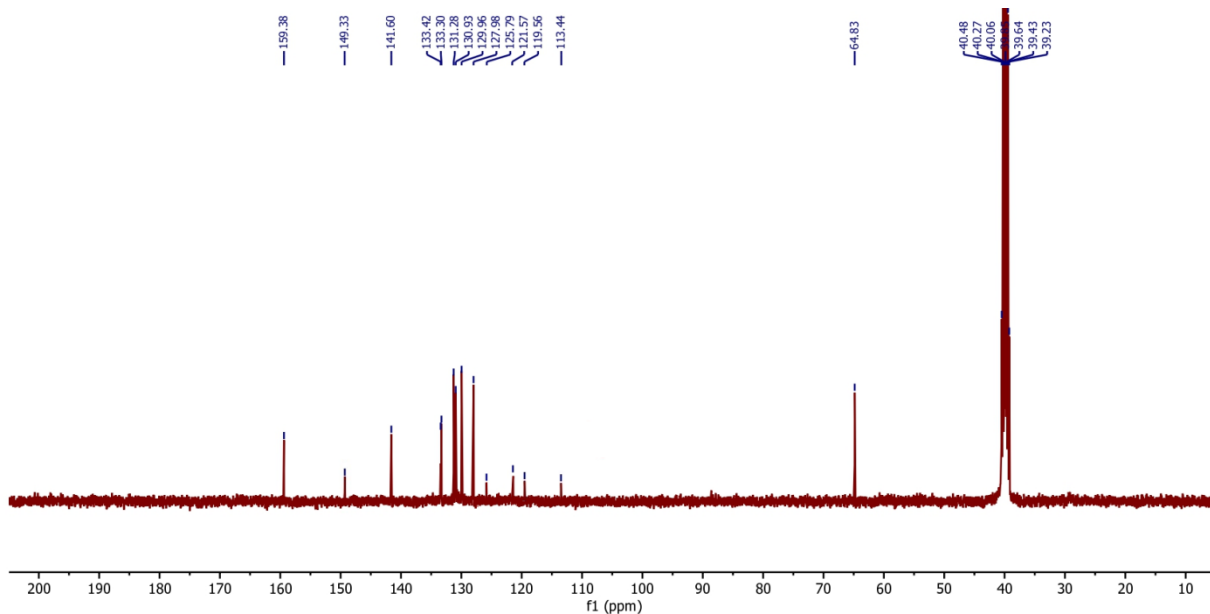

<sup>13</sup>C NMR Spectrum of **4g** (101 MHz, DMSO-d<sub>6</sub>)

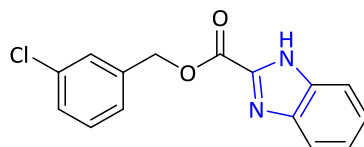

### 3-chlorobenzyl 1H-benzo[d]imidazole-2-carboxylate (4h)

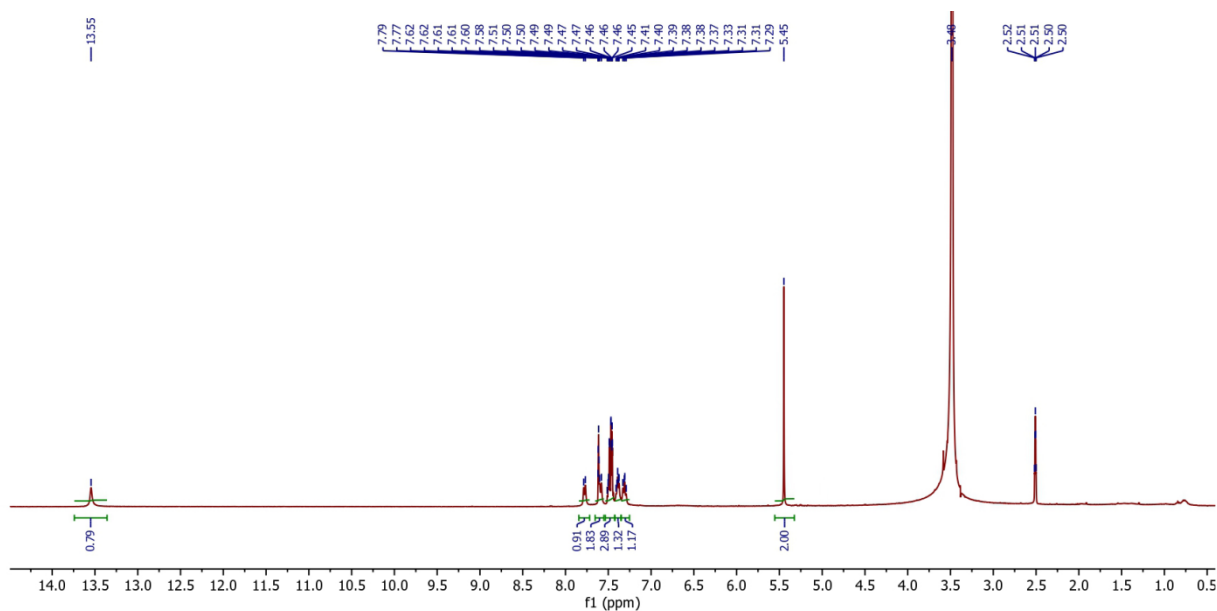

<sup>1</sup>H NMR Spectrum of **4h** (400 MHz, DMSO-d<sub>6</sub>)

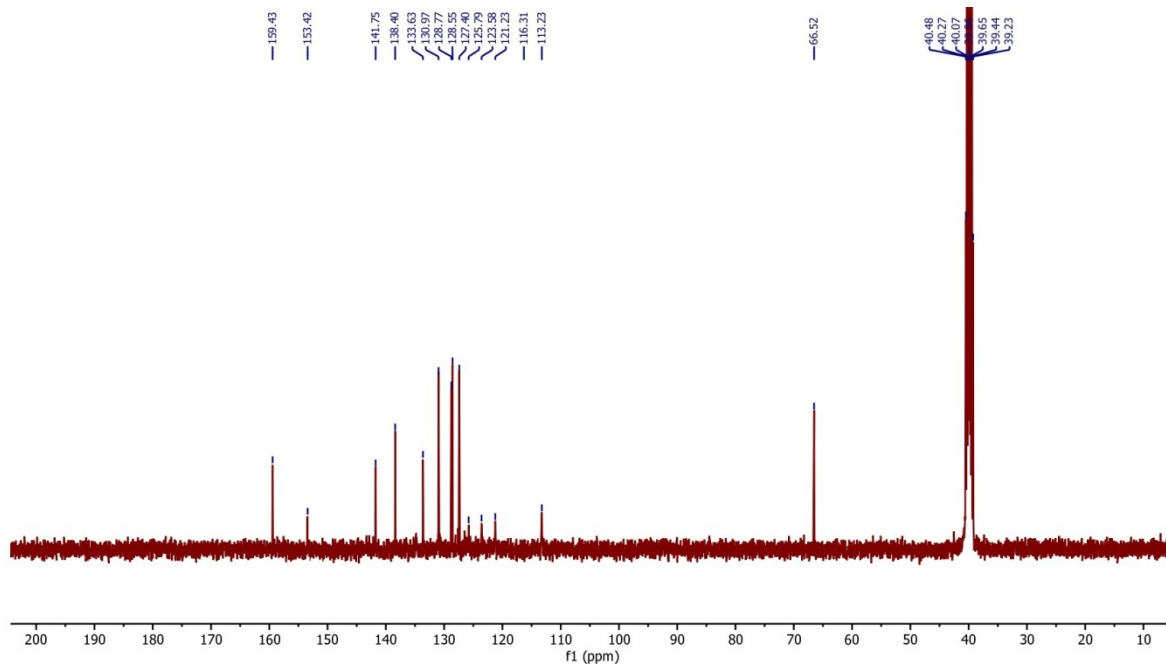

<sup>13</sup>C NMR Spectrum of **4h** (101 MHz, DMSO-d<sub>6</sub>)

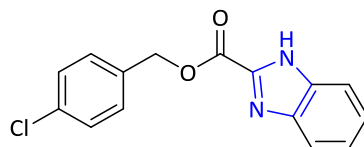

4-chlorobenzyl 1H-benzo[d]imidazole-2-carboxylate (**4i**)

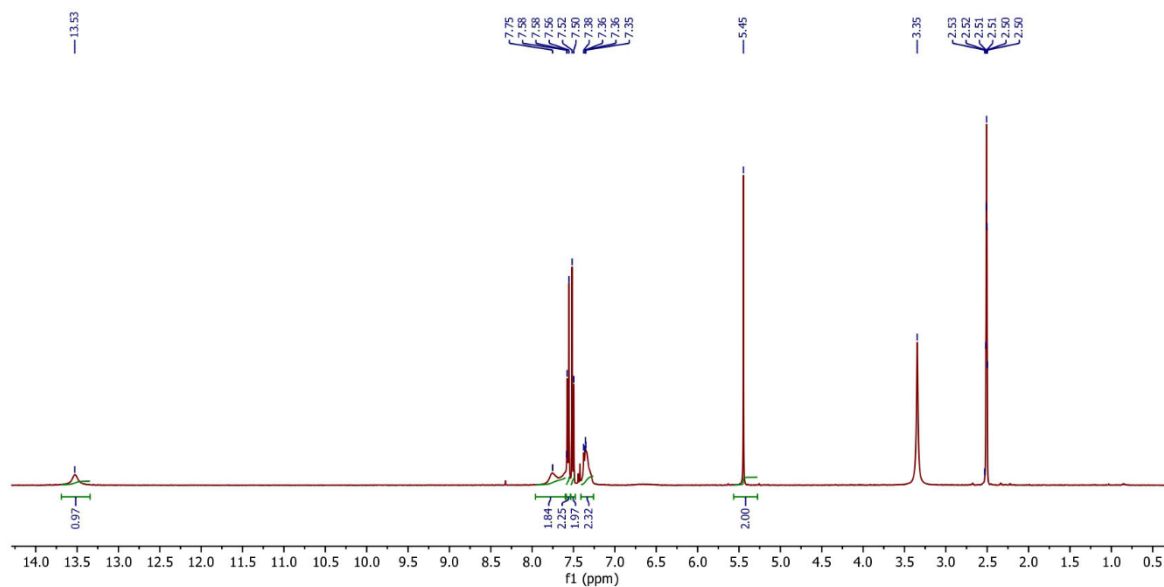

<sup>1</sup>H NMR Spectrum of **4i** (400 MHz, DMSO-d<sub>6</sub>)

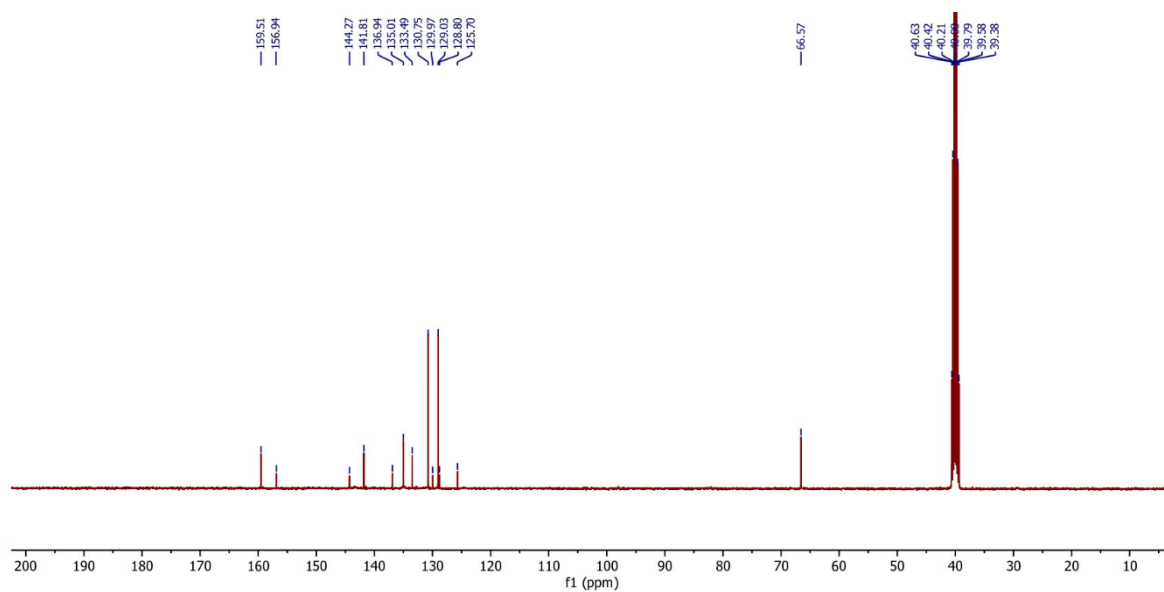

<sup>13</sup>C NMR Spectrum of **4i** (101 MHz, DMSO-d<sub>6</sub>)

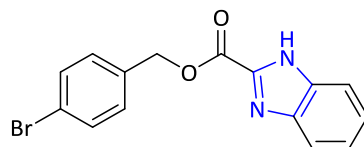

**4-bromobenzyl 1H-benzo[d]imidazole-2-carboxylate (4j)**

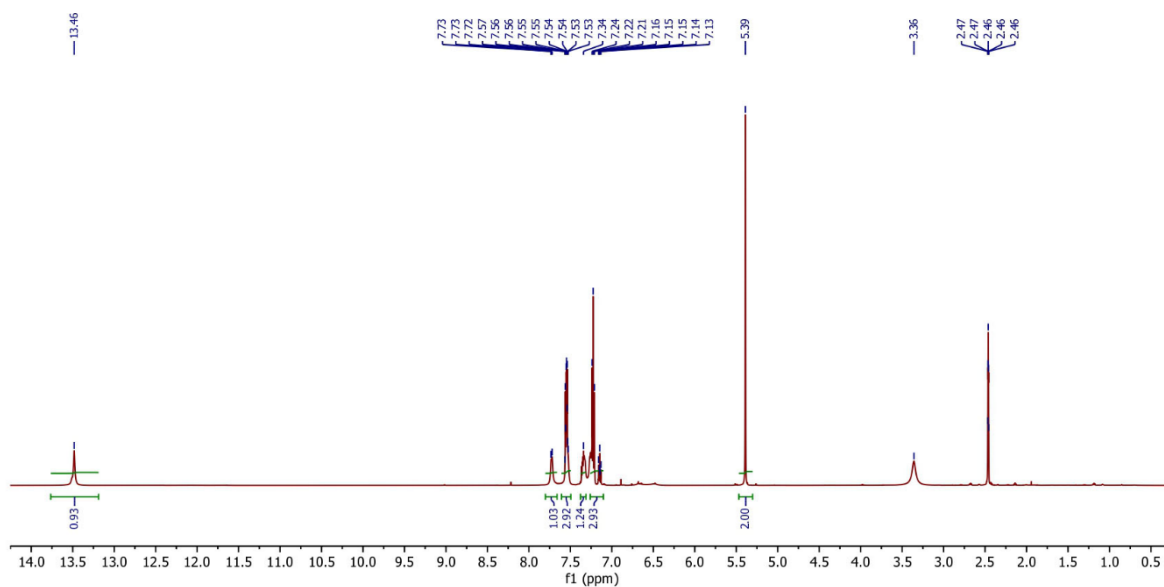

<sup>1</sup>H NMR Spectrum of **4j** (400 MHz, DMSO-d<sub>6</sub>)

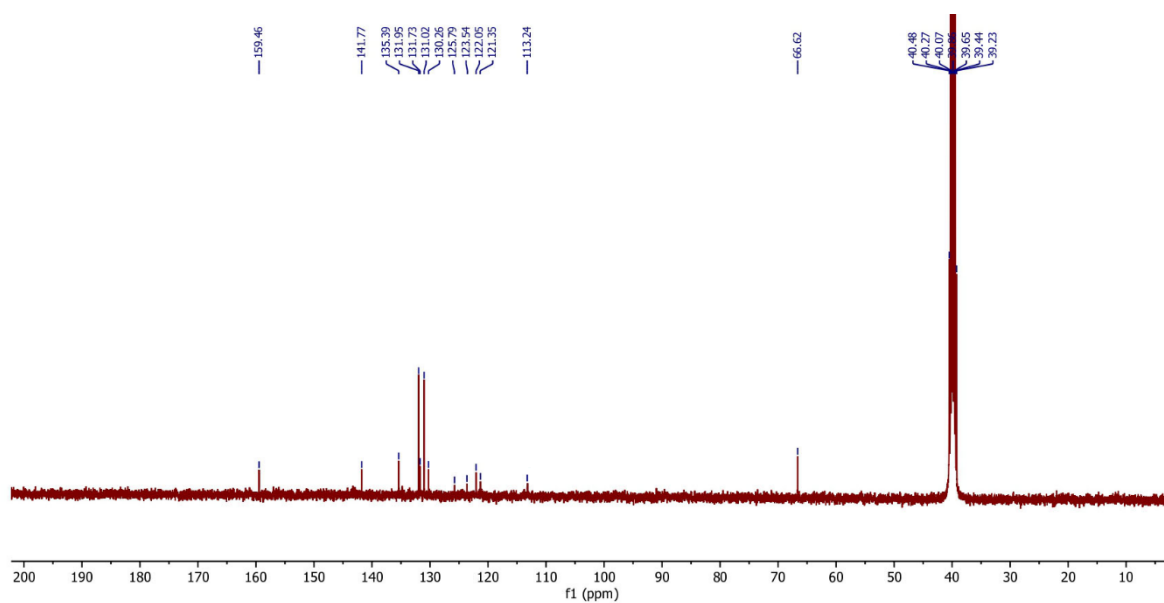

<sup>13</sup>C NMR Spectrum of **4j** (151 MHz, DMSO-d<sub>6</sub>)

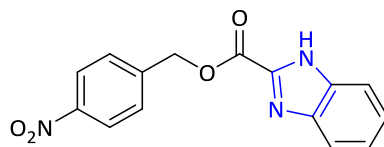

**4-nitrobenzyl 1H-benzo[d]imidazole-2-carboxylate (4k)**

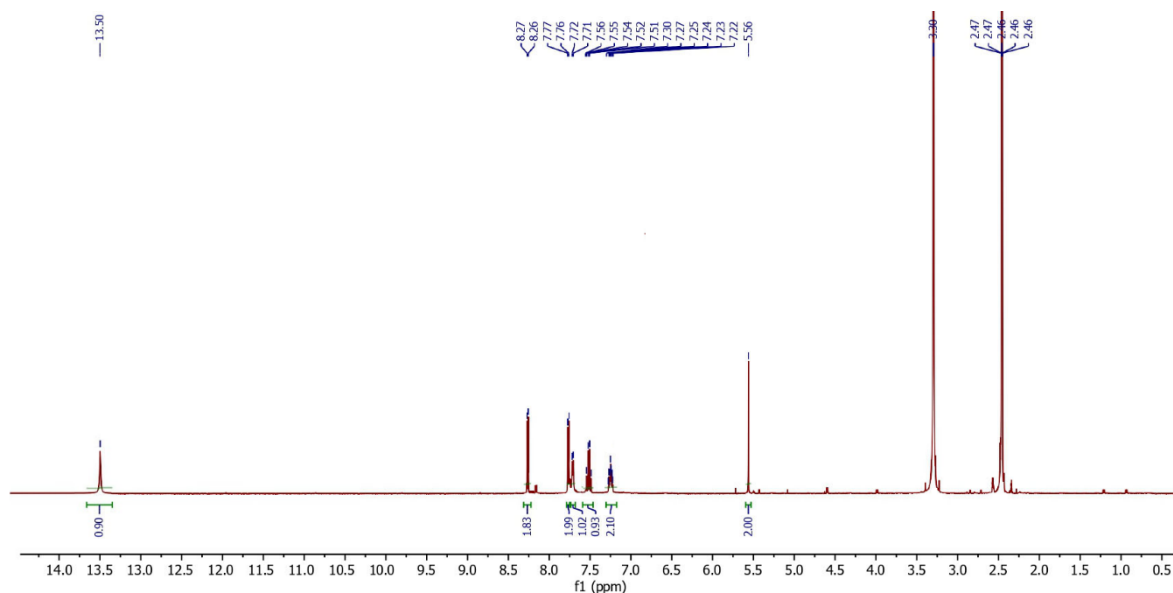

<sup>1</sup>H NMR Spectrum of **4k** (600 MHz, DMSO-d<sub>6</sub>)

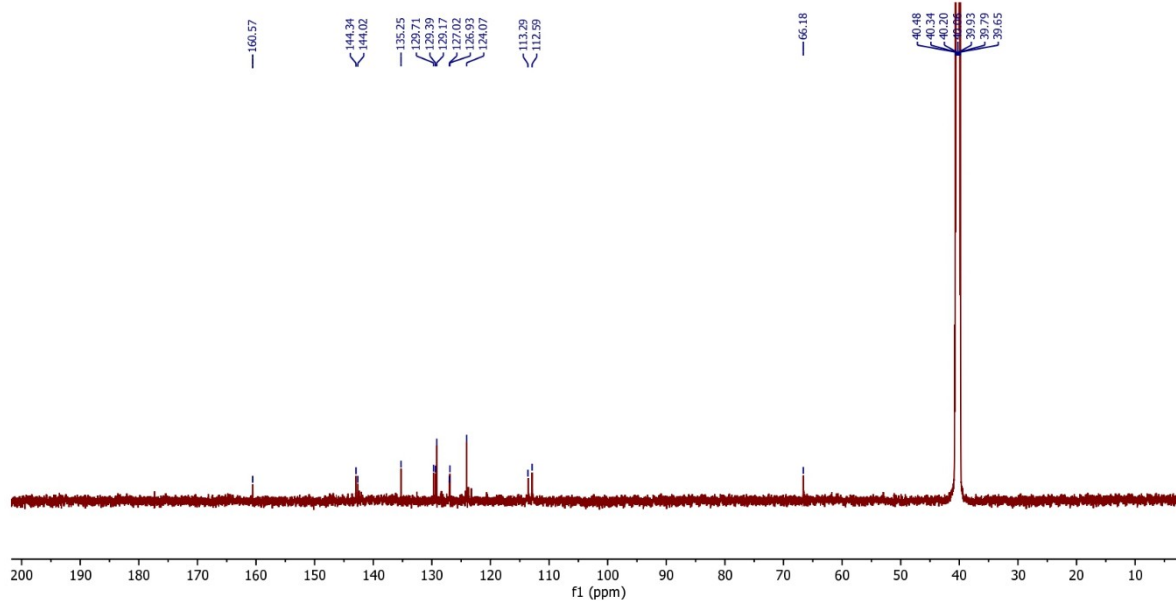

<sup>13</sup>C NMR Spectrum of **4k** (151 MHz, DMSO-d<sub>6</sub>)

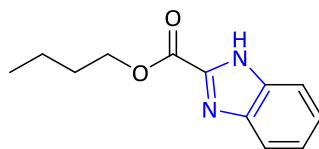

**Butyl 1H-benzo[d]imidazole-2-carboxylate (4I)**

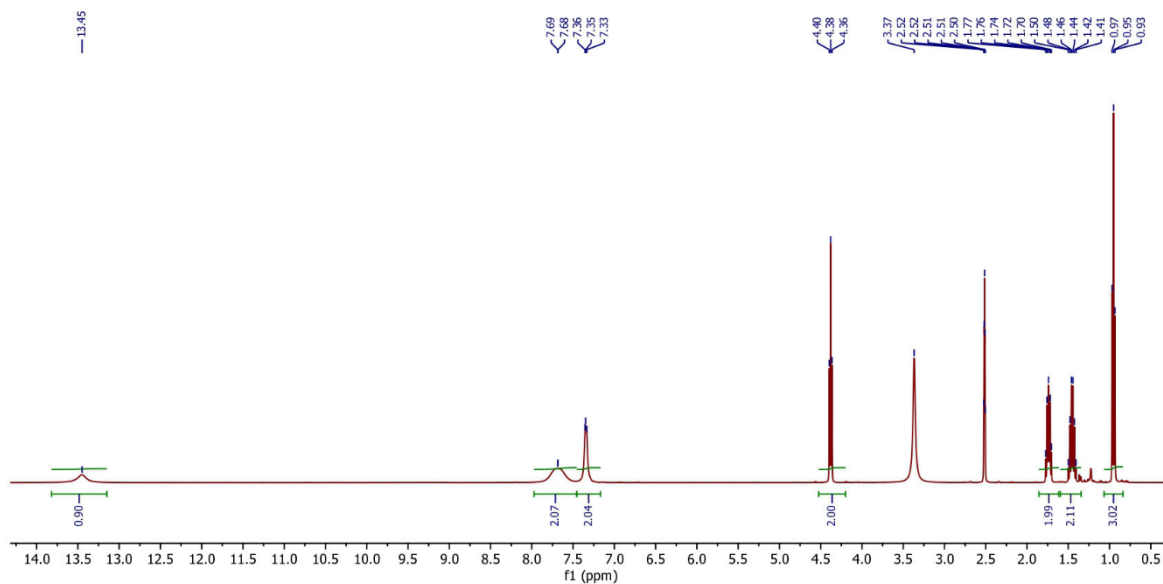

<sup>1</sup>H NMR Spectrum of **4I** (400 MHz, DMSO-d<sub>6</sub>)

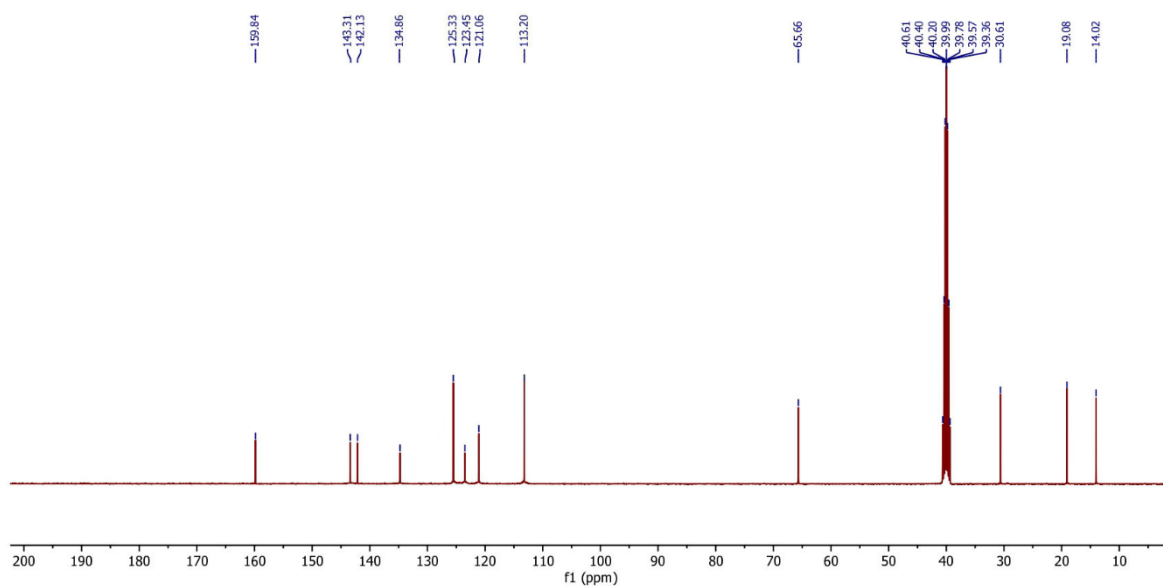

<sup>13</sup>C NMR Spectrum of **4I** (101 MHz, DMSO-d<sub>6</sub>)



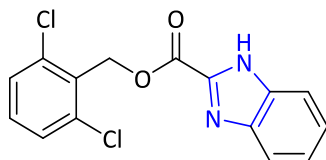

2,6-dichlorobenzyl 1H-benzo[d]imidazole-2-carboxylate (**4n**)

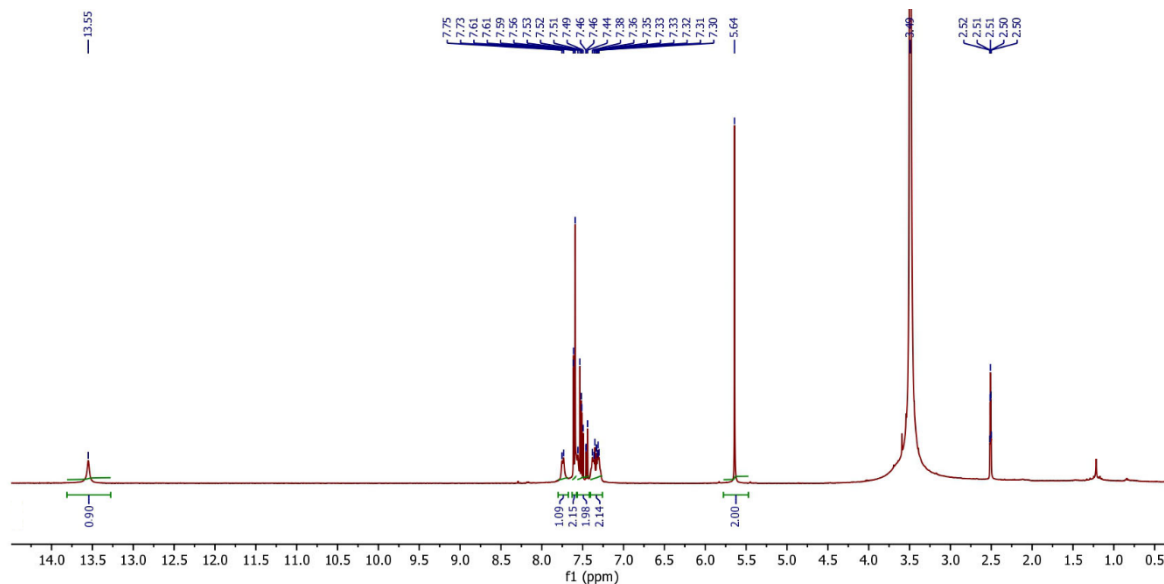

$^1\text{H}$  NMR Spectrum of **4n** (400 MHz,  $\text{DMSO-d}_6$ )

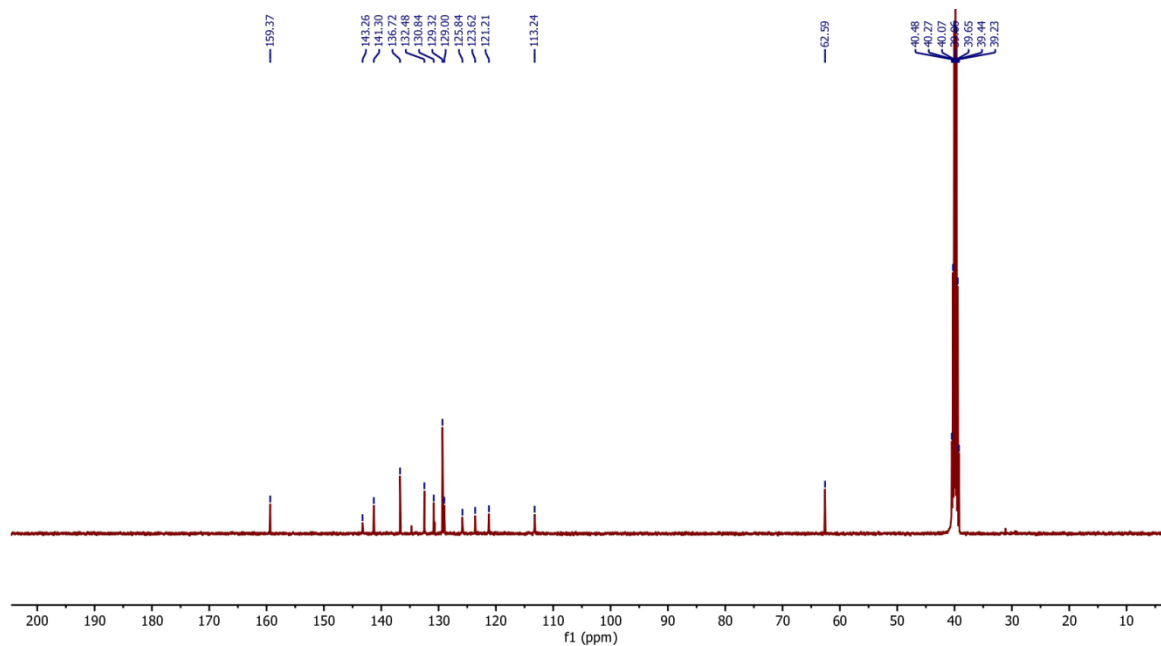

$^{13}\text{C}$  NMR Spectrum of **4n** (101 MHz,  $\text{DMSO-d}_6$ )

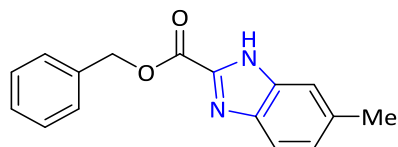

**Benzyl 6-methyl-1H-benzo[d]imidazole-2-carboxylate (4o)**

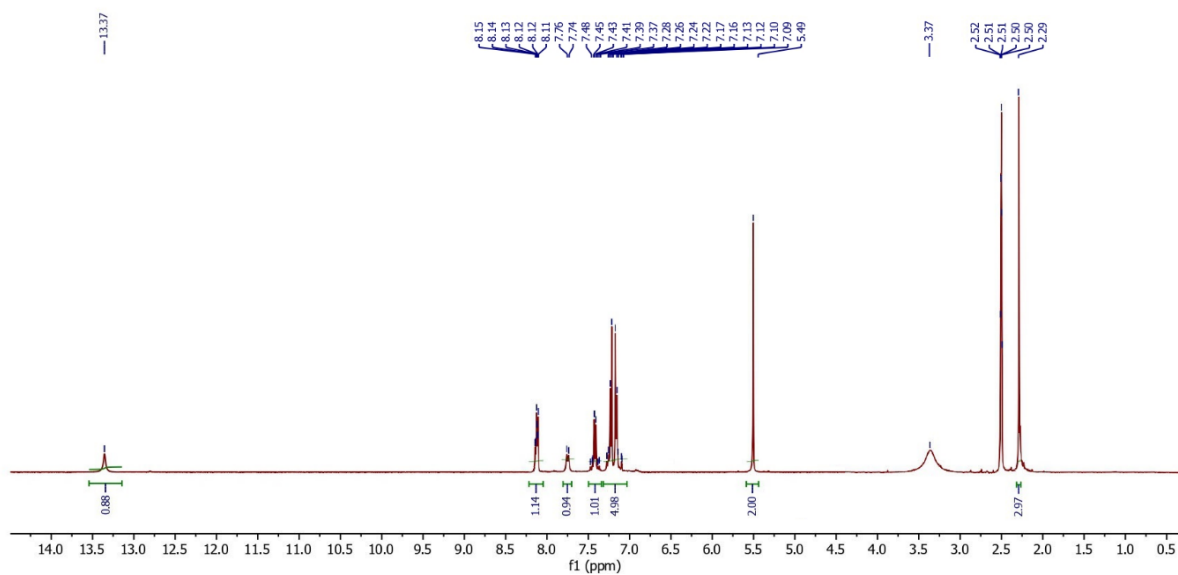

$^1\text{H}$  NMR Spectrum of **4o** (400 MHz, DMSO- $d_6$ )

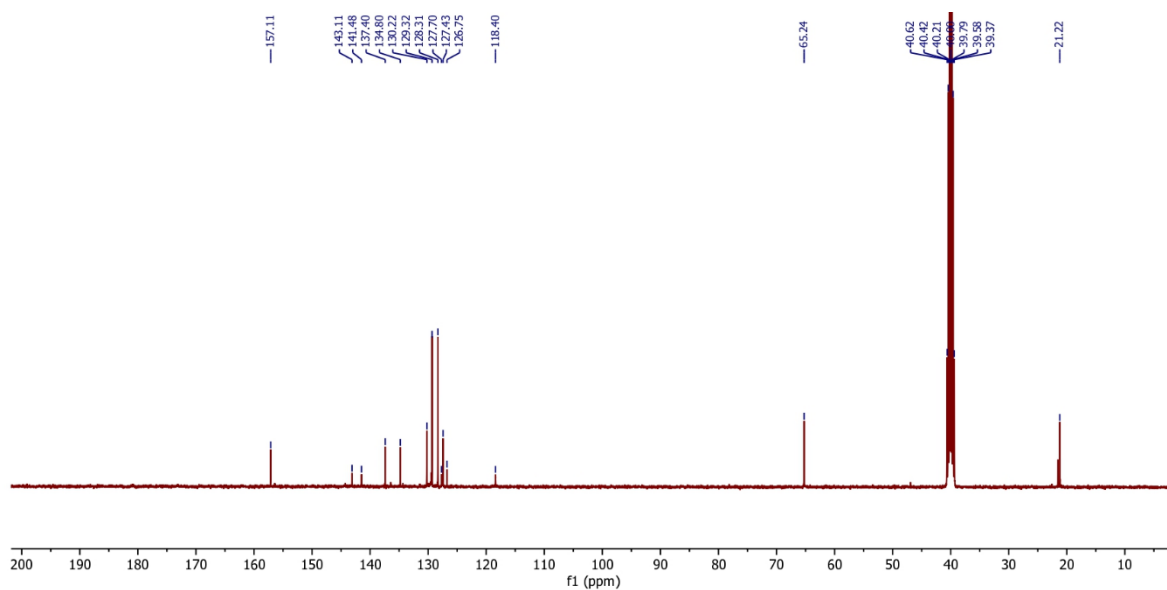

$^{13}\text{C}$  NMR Spectrum of **4o** (101 MHz, DMSO- $d_6$ )

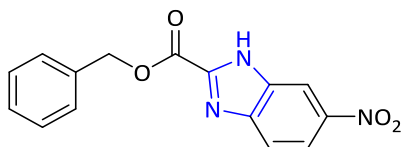

**Benzyl 6-nitro-1H-benzo[d]imidazole-2-carboxylate (4p)**

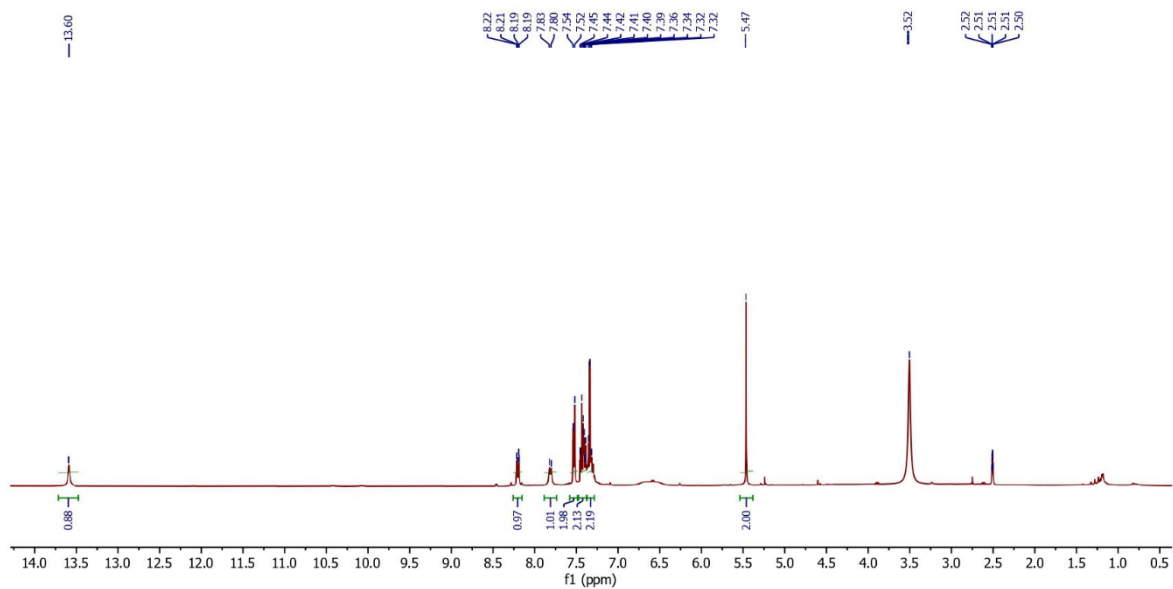

<sup>1</sup>H NMR Spectrum of **4p** (400 MHz, DMSO-d<sub>6</sub>)

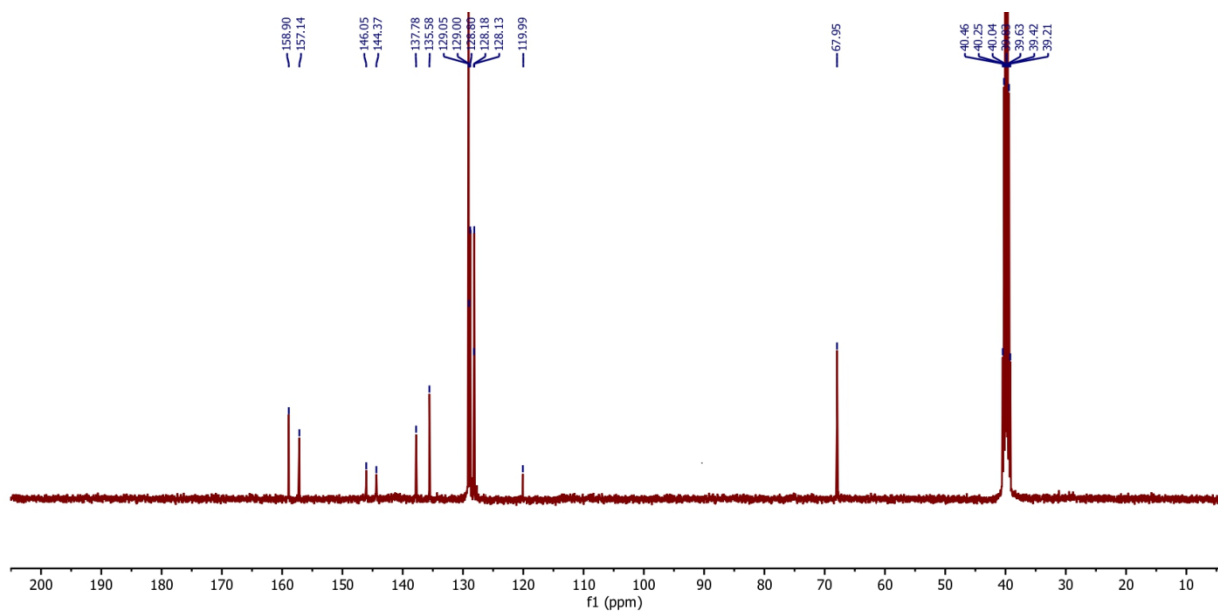

<sup>13</sup>C NMR Spectrum of **4p** (101 MHz, DMSO-d<sub>6</sub>)

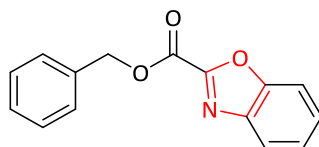

**Benzyl benzo[d]oxazole-2-carboxylate (5a)**

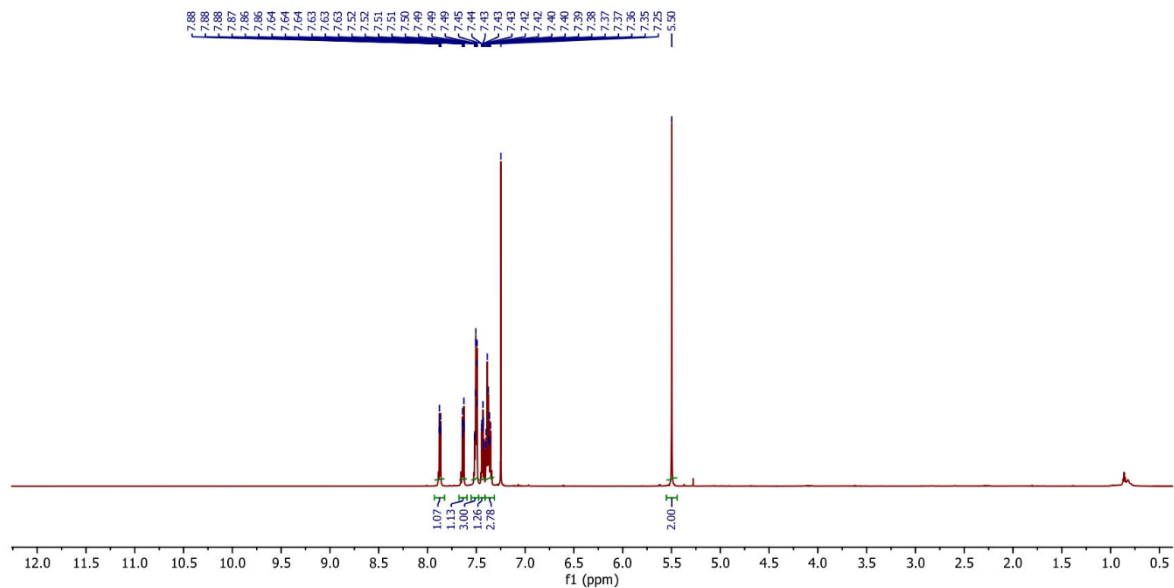

**<sup>1</sup>H NMR Spectrum of 5a (600 MHz, CDCl<sub>3</sub>)**

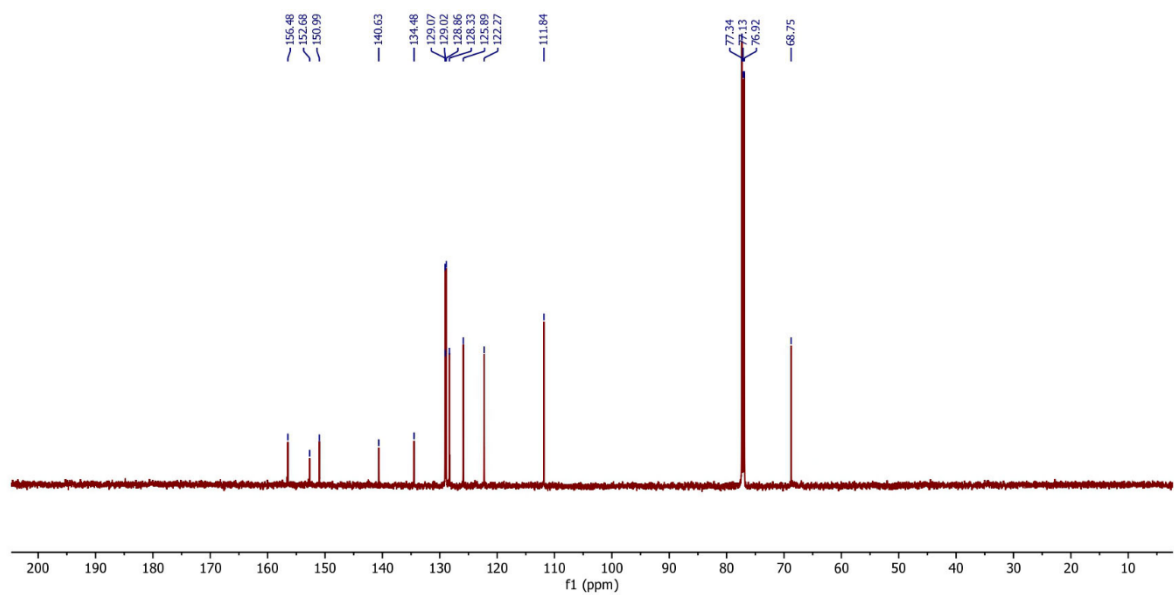

**<sup>13</sup>C NMR Spectrum of 5a (151 MHz, CDCl<sub>3</sub>)**

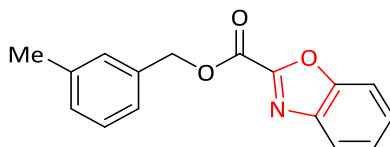

**3-methylbenzyl benzo[d]oxazole-2-carboxylate (5b)**

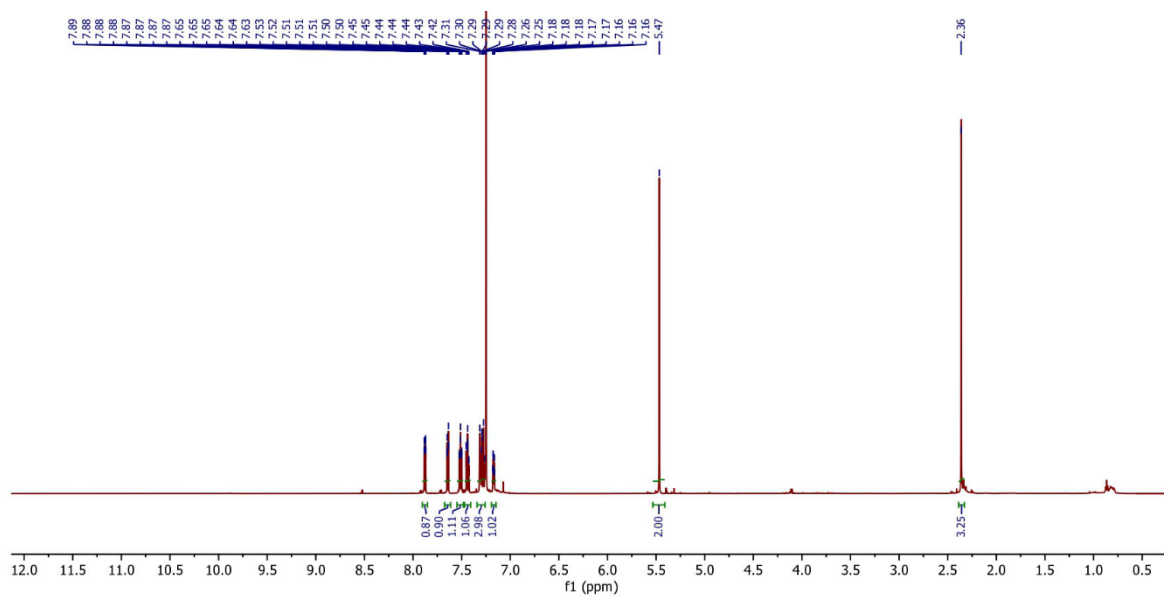

<sup>1</sup>H NMR Spectrum of **5b** (600 MHz, CDCl<sub>3</sub>)

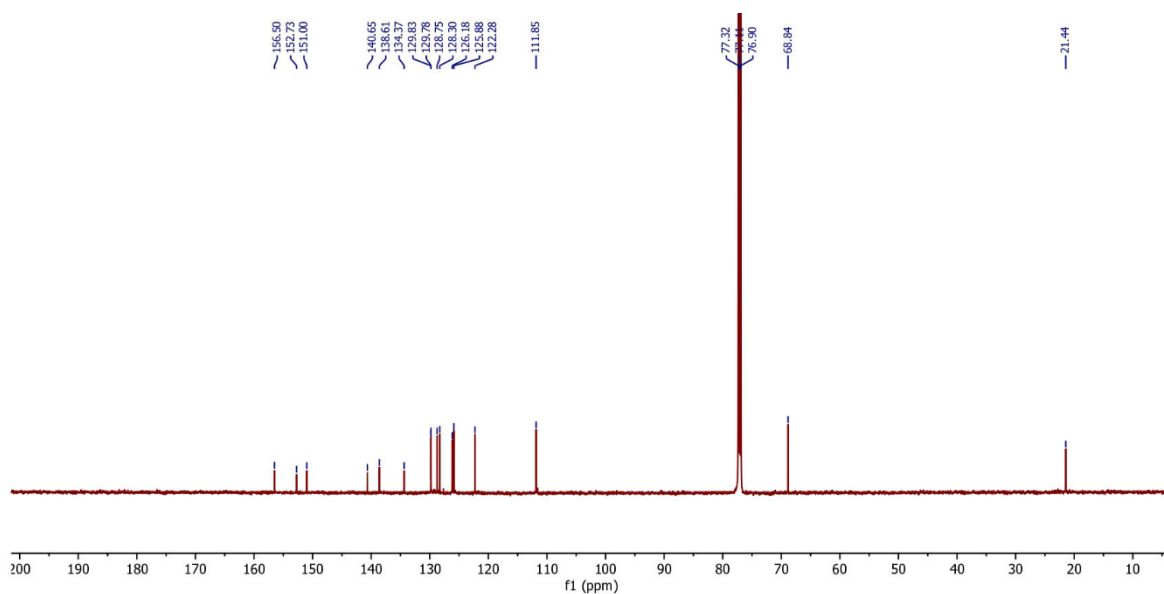

<sup>13</sup>C NMR Spectrum of **5b** (151 MHz, CDCl<sub>3</sub>)

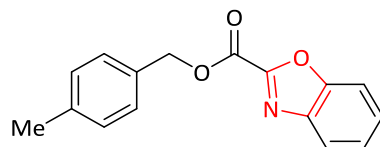

**4-methylbenzyl benzo[d]oxazole-2-carboxylate (5c)**

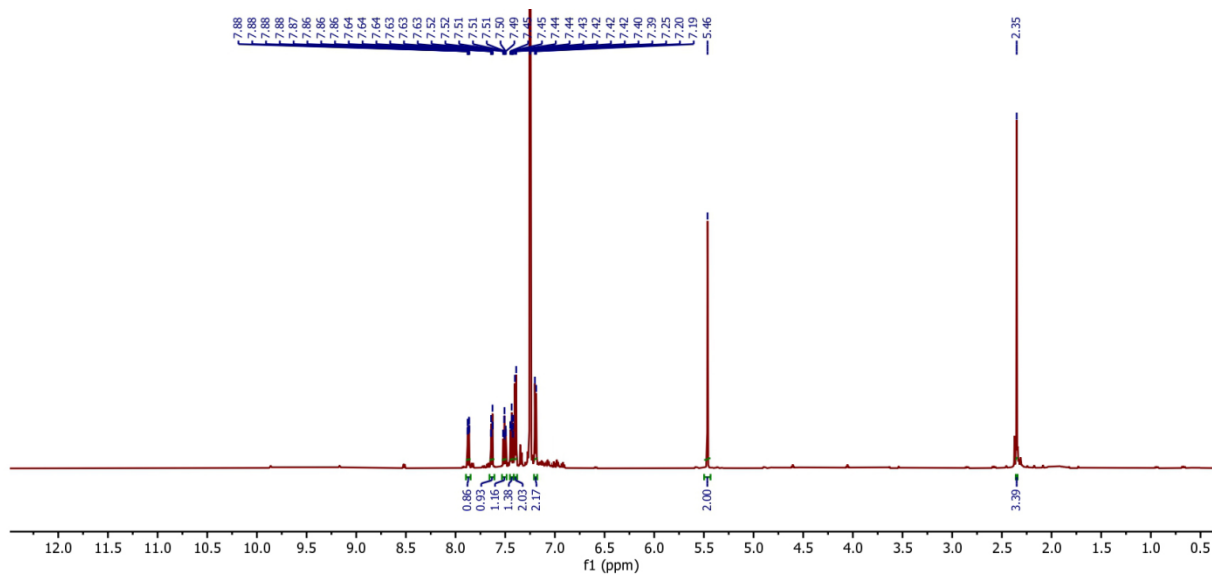

<sup>1</sup>H NMR Spectrum of **5c** (600 MHz, CDCl<sub>3</sub>)

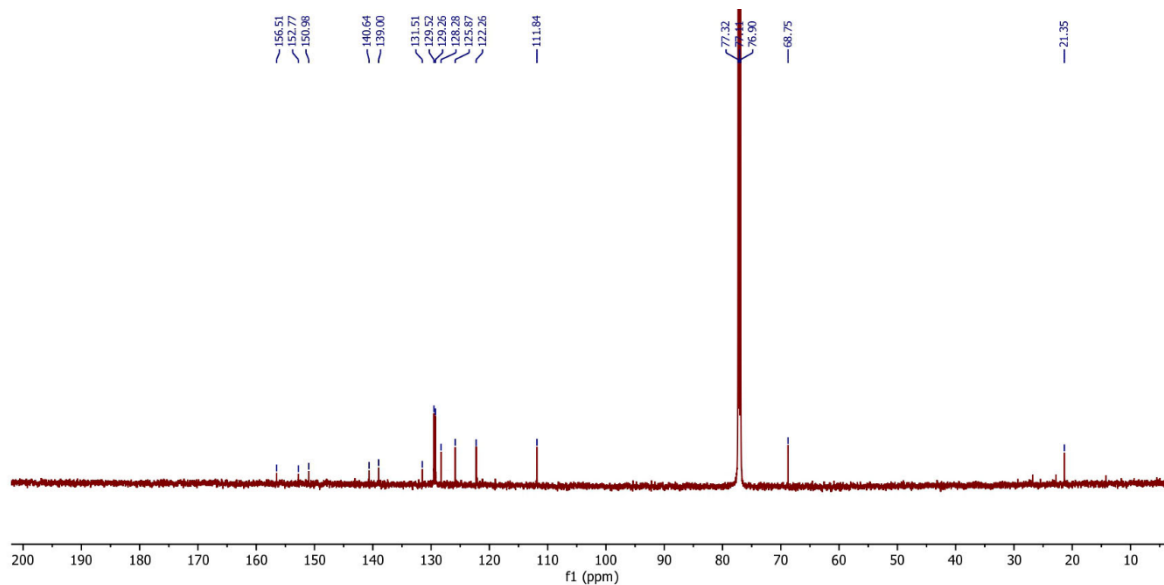

<sup>13</sup>C NMR Spectrum of **5c** (151 MHz, CDCl<sub>3</sub>)

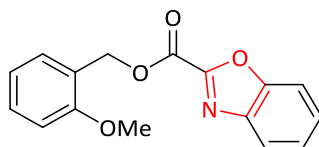

**2-methoxybenzyl benzo[d]oxazole-2-carboxylate (5d)**

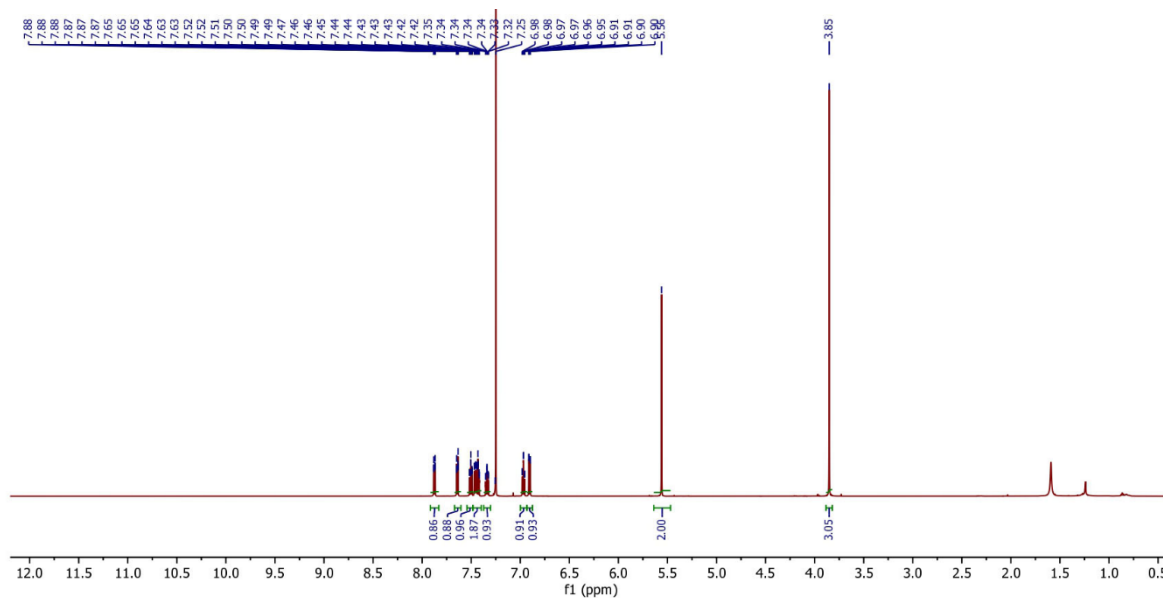

$^1\text{H}$  NMR Spectrum of **5d** (600 MHz,  $\text{CDCl}_3$ )

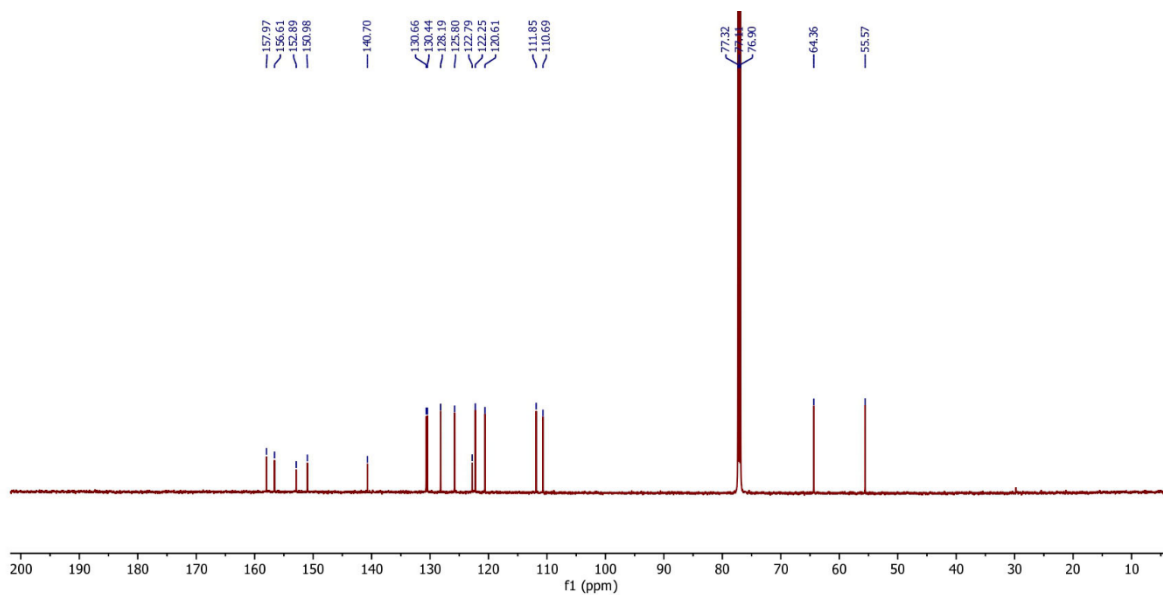

$^{13}\text{C}$  NMR Spectrum of **5d** (151 MHz,  $\text{CDCl}_3$ )

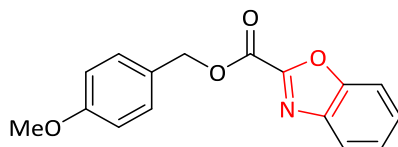

**4-methoxybenzyl benzo[d]oxazole-2-carboxylate (5e)**

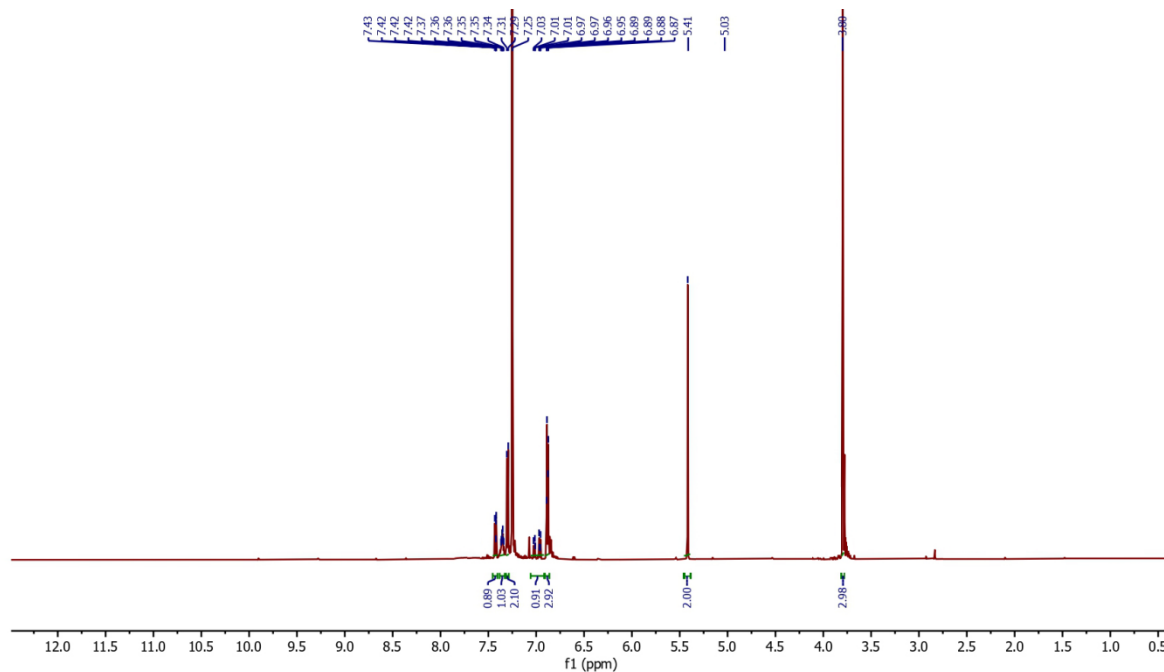

<sup>1</sup>H NMR Spectrum of **5e** (600 MHz, CDCl<sub>3</sub>)

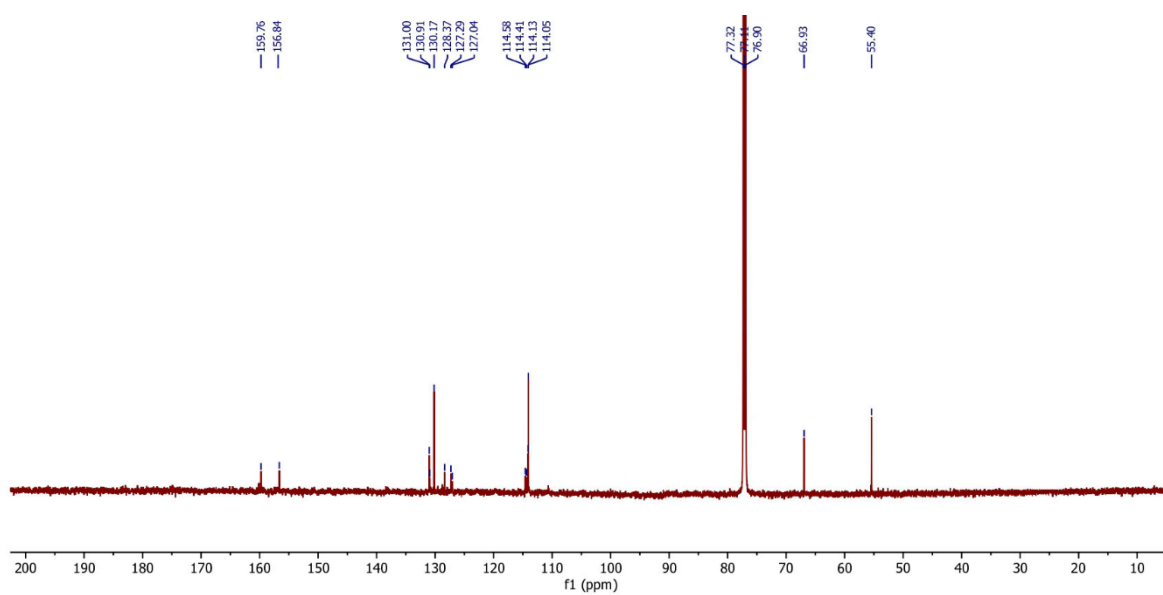

<sup>13</sup>C NMR Spectrum of **5e** (151 MHz, CDCl<sub>3</sub>)

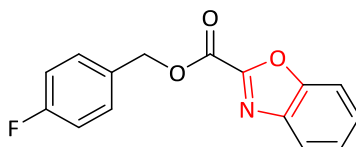

**4-fluorobenzyl benzo[d]oxazole-2-carboxylate (5f)**

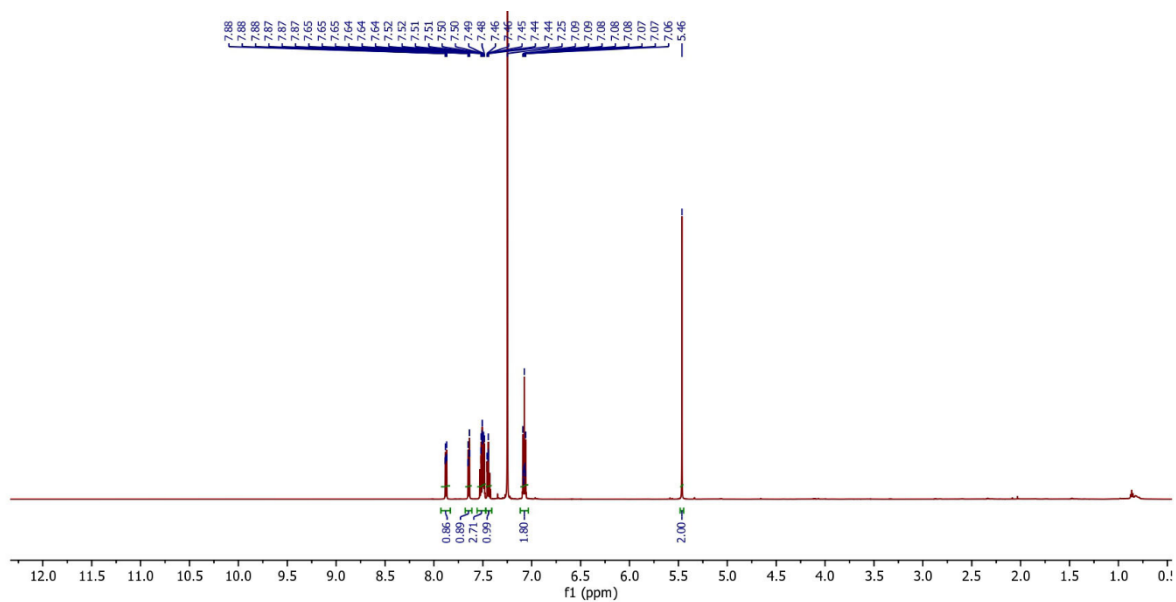

$^1\text{H}$  NMR Spectrum of **5f** (600 MHz,  $\text{CDCl}_3$ )

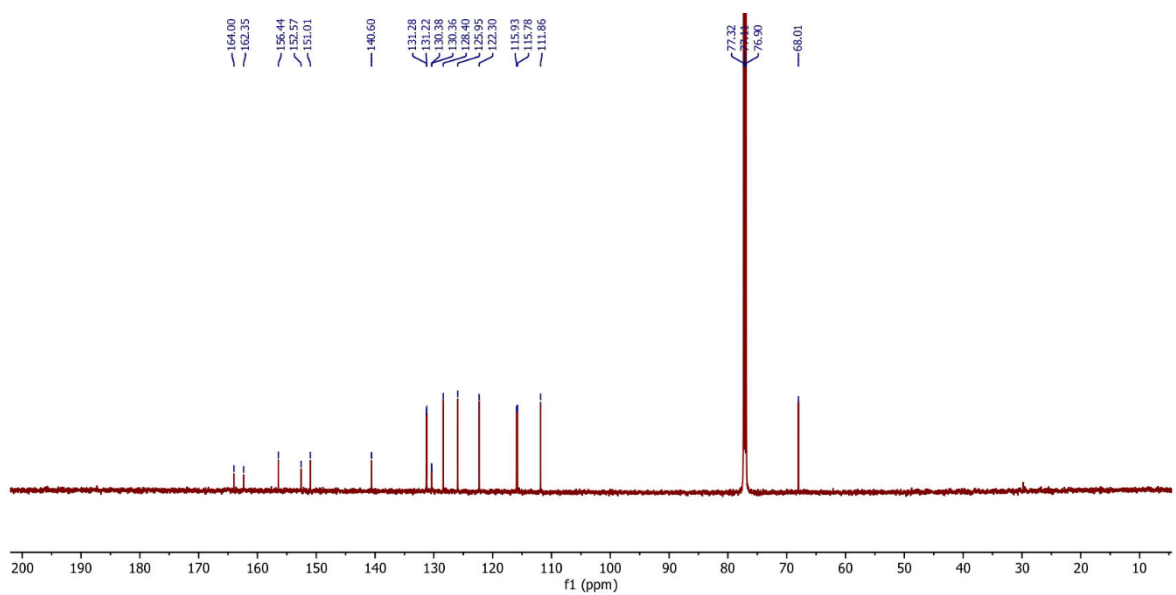

$^{13}\text{C}$  NMR Spectrum of **5f** (151 MHz,  $\text{CDCl}_3$ )

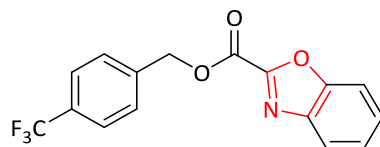

### 4-(trifluoromethyl)benzyl benzo[d]oxazole-2-carboxylate (5g)

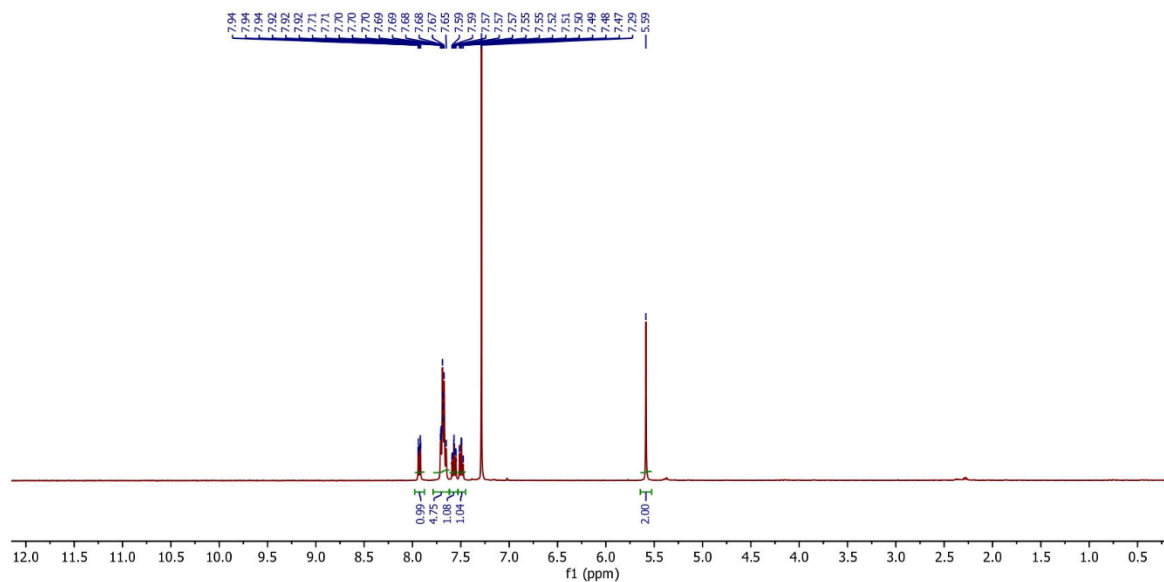

<sup>1</sup>H NMR Spectrum of **5g** (400 MHz, CDCl<sub>3</sub>)

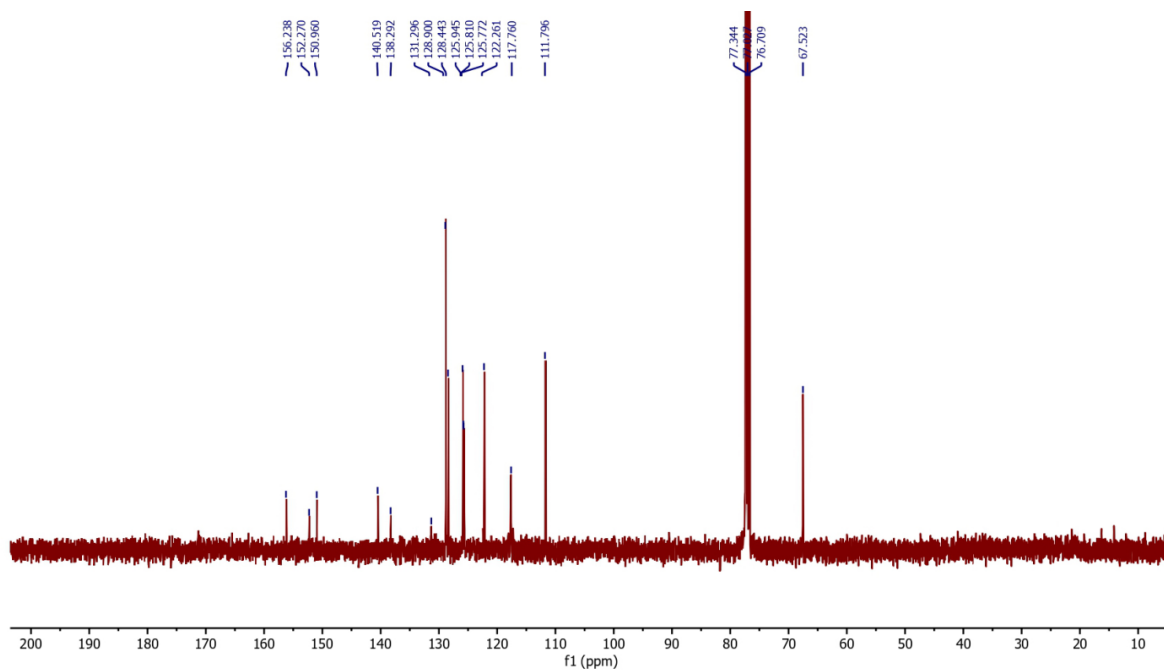

<sup>13</sup>C NMR Spectrum of **5g** (101 MHz, CDCl<sub>3</sub>)

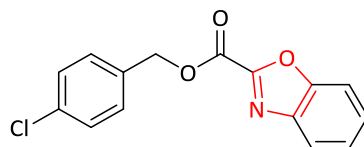

4-chlorobenzyl benzo[d]oxazole-2-carboxylate (**5h**)

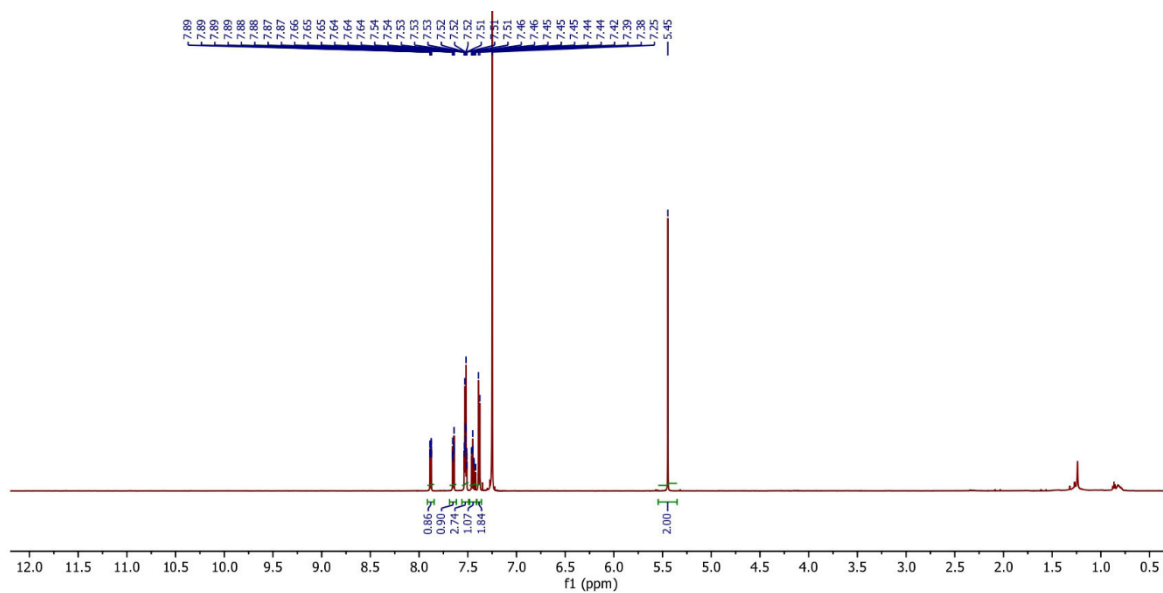

<sup>1</sup>H NMR Spectrum of **5h** (600 MHz, CDCl<sub>3</sub>)

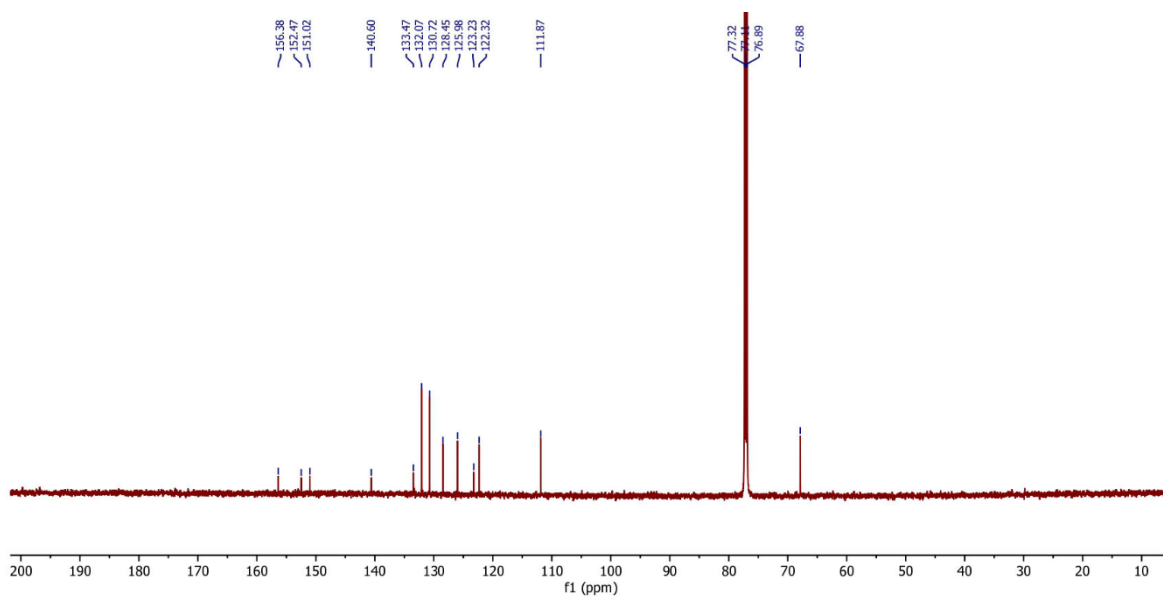

<sup>13</sup>C NMR Spectrum of **5h** (151 MHz, CDCl<sub>3</sub>)



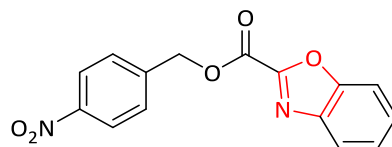

**4-nitrobenzyl benzo[d]oxazole-2-carboxylate (5j)**

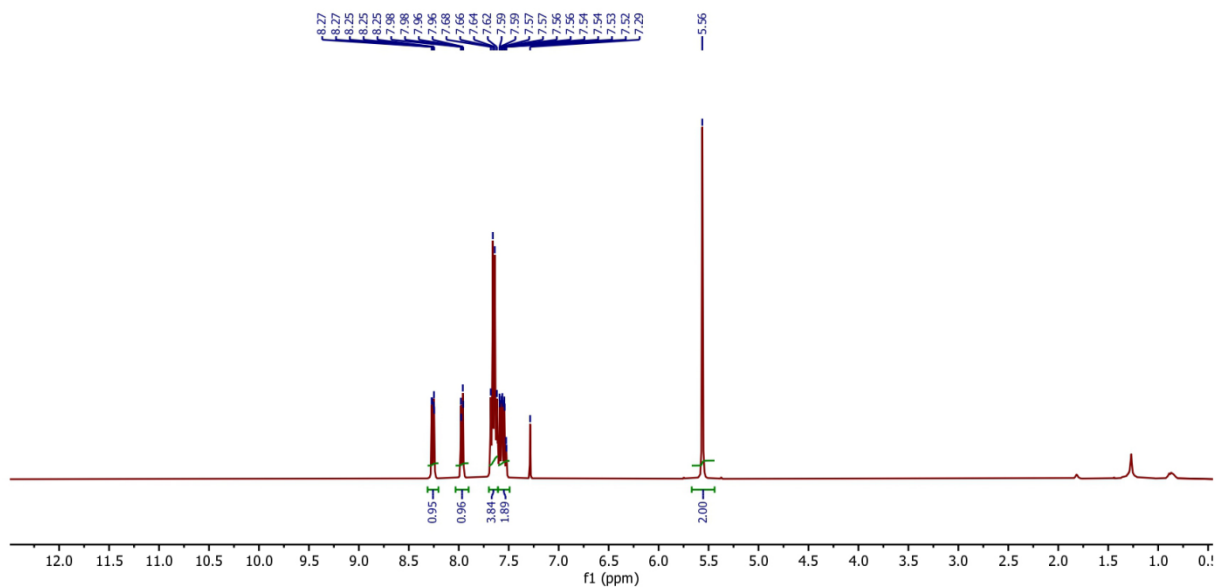

$^1\text{H}$  NMR Spectrum of **5j** (400 MHz,  $\text{CDCl}_3$ )

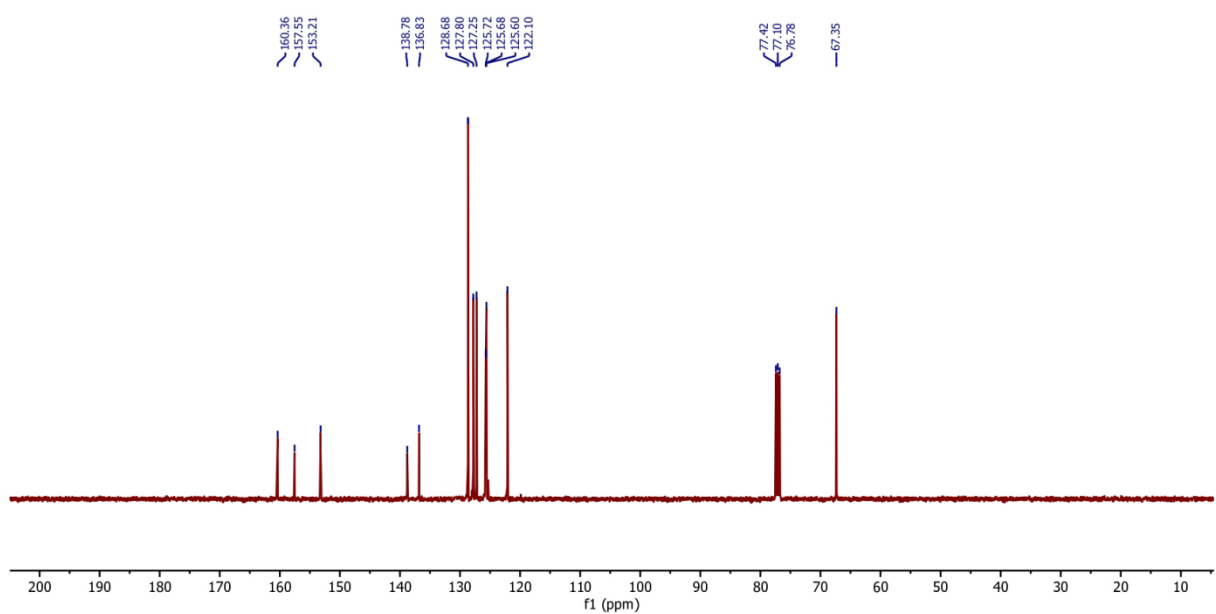

$^{13}\text{C}$  NMR Spectrum of **5j** (101 MHz,  $\text{CDCl}_3$ )

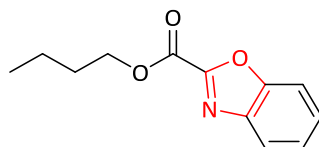

Butyl benzo[d]oxazole-2-carboxylate (**5k**)

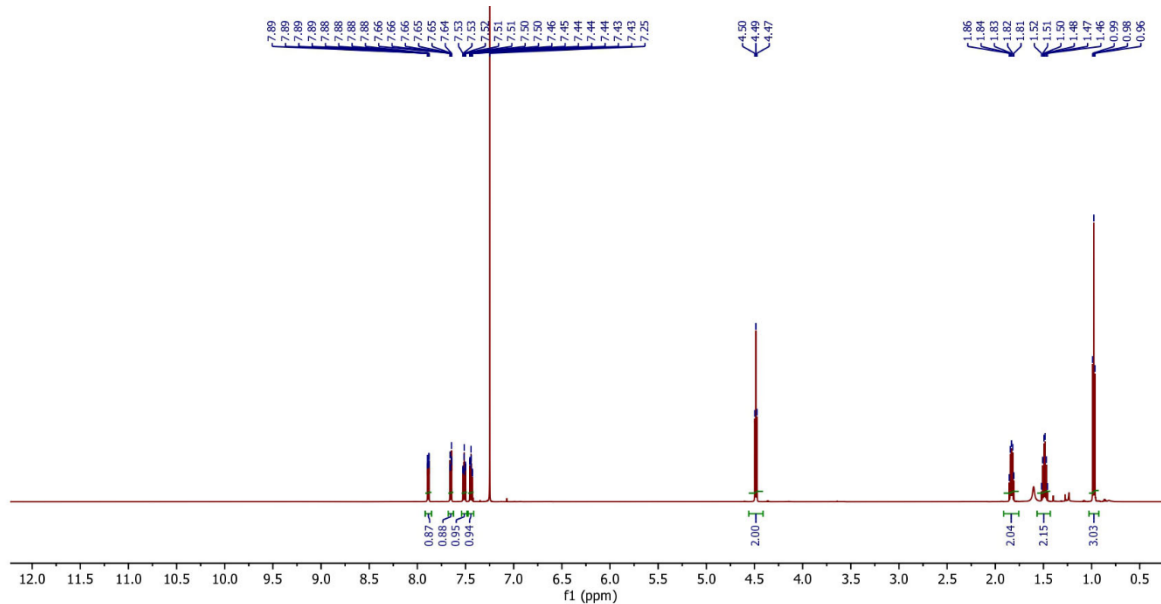

<sup>1</sup>H NMR Spectrum of **5k** (600 MHz, CDCl<sub>3</sub>)

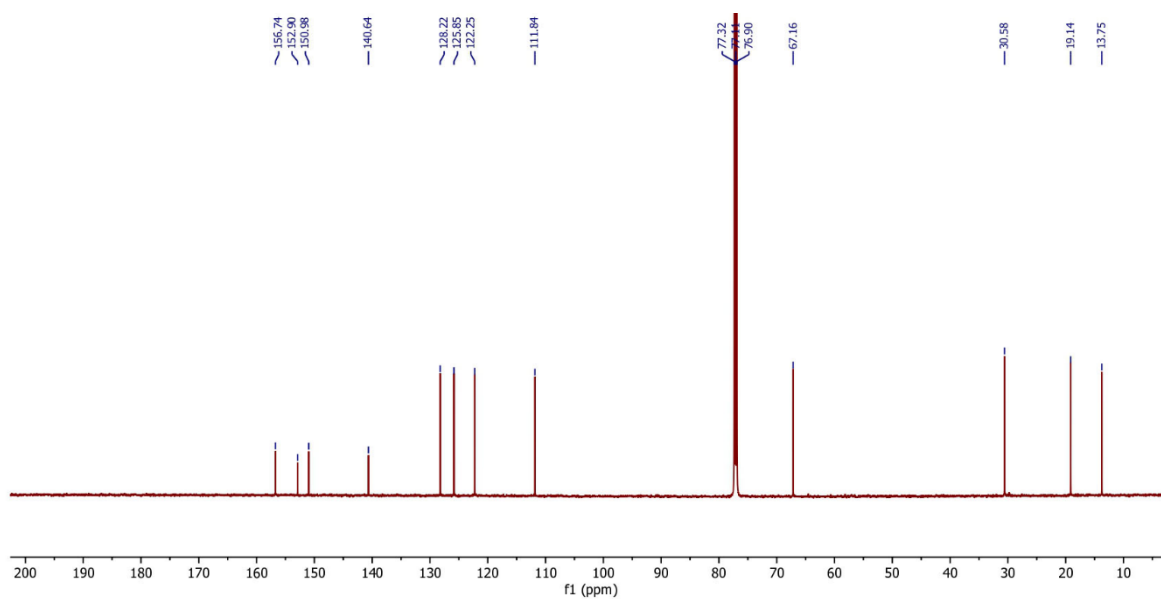

<sup>13</sup>C NMR Spectrum of **5k** (151 MHz, CDCl<sub>3</sub>)

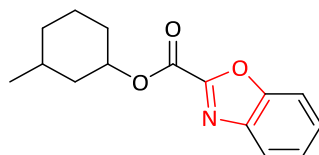

### 3-methylcyclohexyl benzo[d]oxazole-2-carboxylate (**51**)

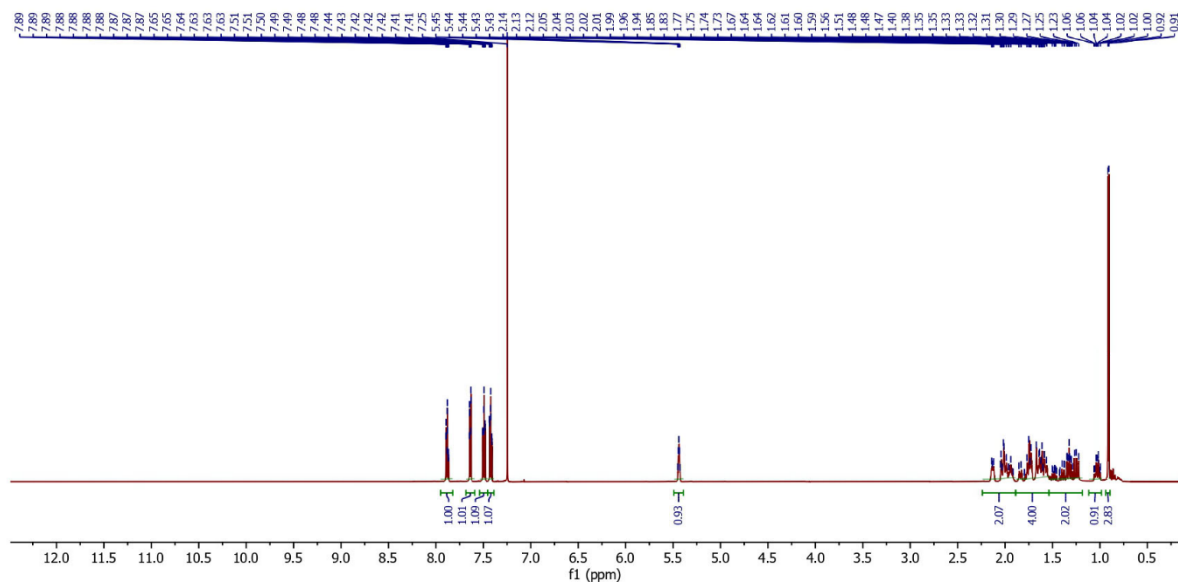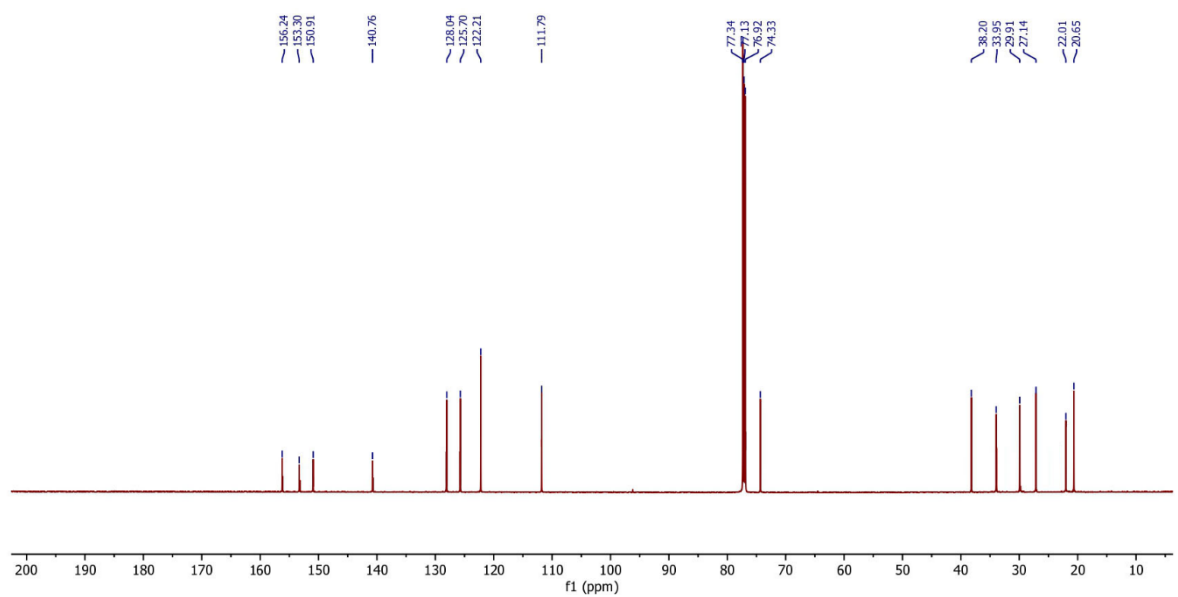

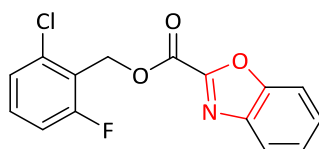

**2-chloro-6-fluorobenzyl benzo[d]oxazole-2-carboxylate (5m)**

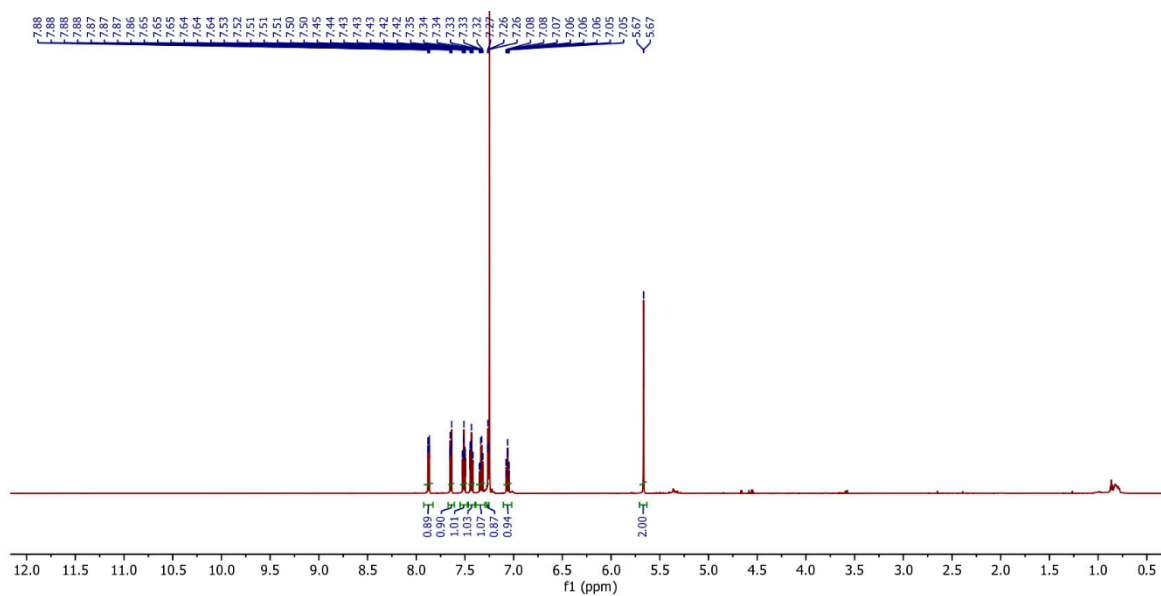

<sup>1</sup>H NMR Spectrum of **5m** (600 MHz, CDCl<sub>3</sub>)

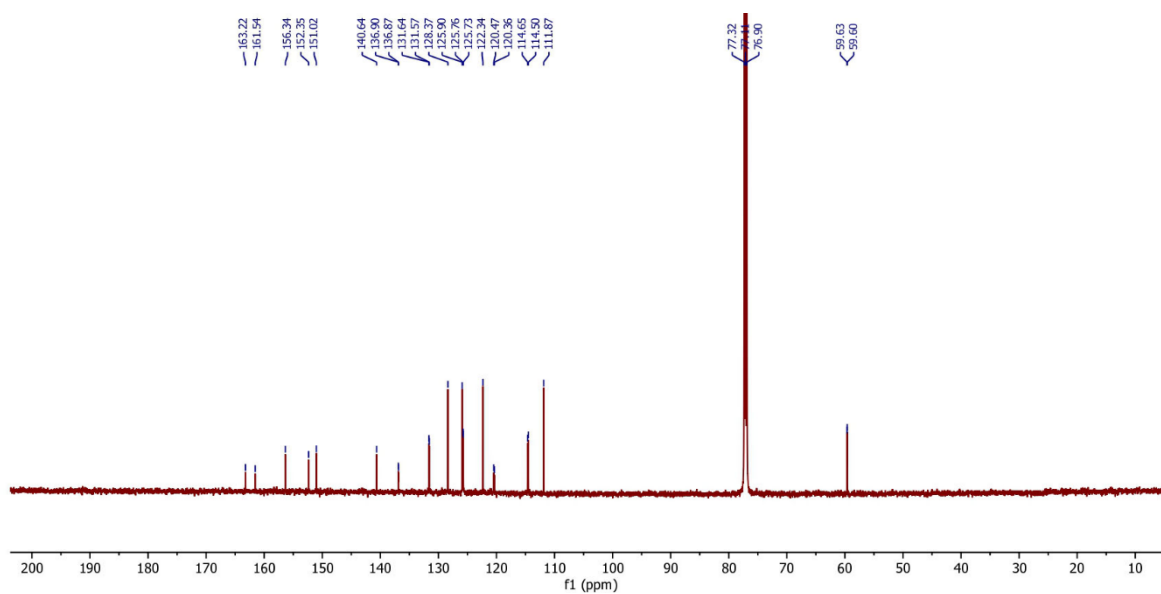

<sup>13</sup>C NMR Spectrum of **5m** (151 MHz, CDCl<sub>3</sub>)

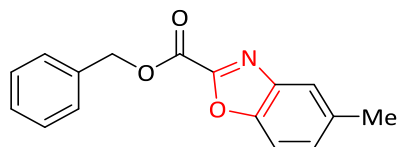

**Benzyl 5-methylbenzo[d]oxazole-2-carboxylate (5n)**

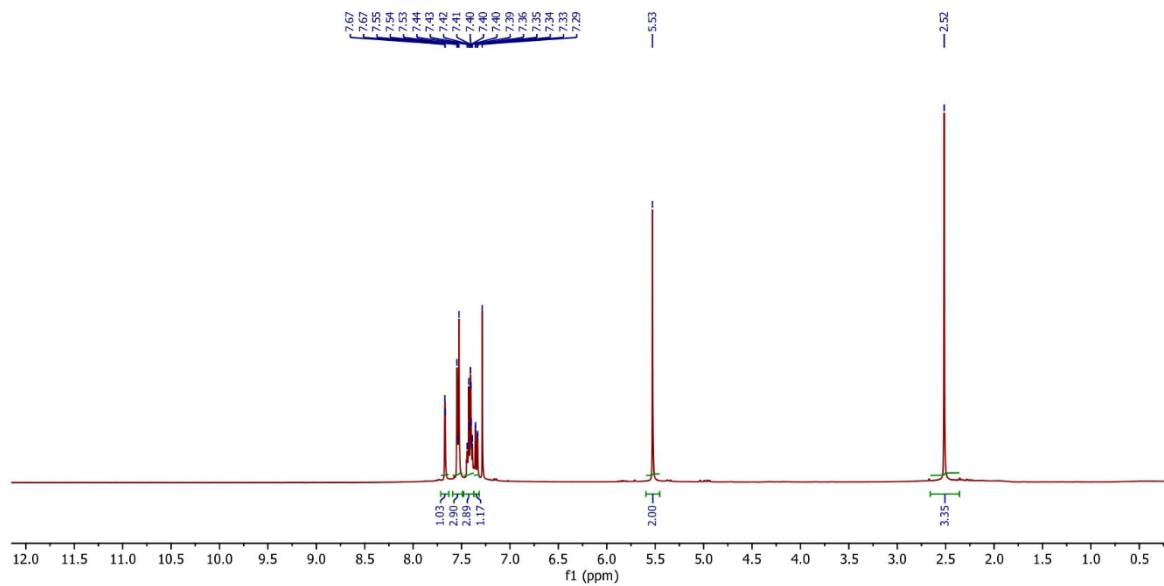

<sup>1</sup>H NMR Spectrum of **5n** (400 MHz, CDCl<sub>3</sub>)

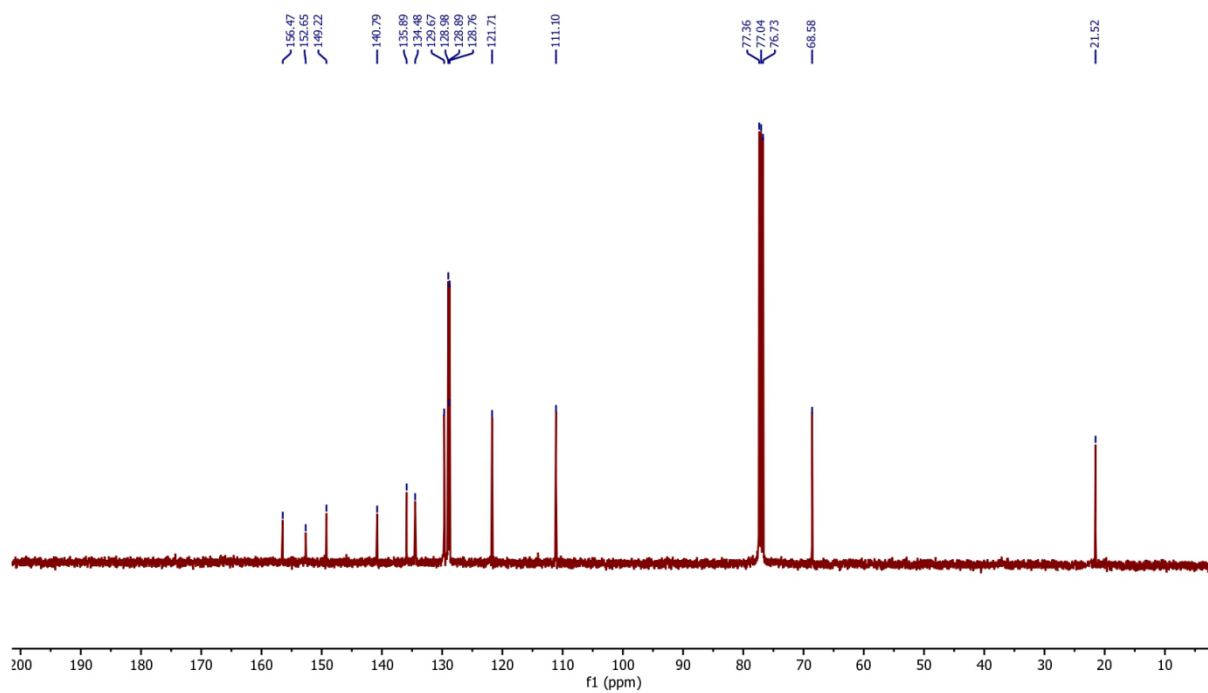

<sup>13</sup>C NMR Spectrum of **5n** (101 MHz, CDCl<sub>3</sub>)

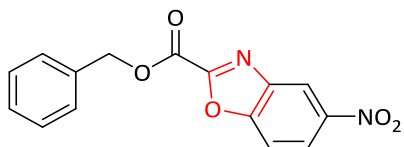

**Benzyl 5-nitrobenzo[d]oxazole-2-carboxylate (5o)**

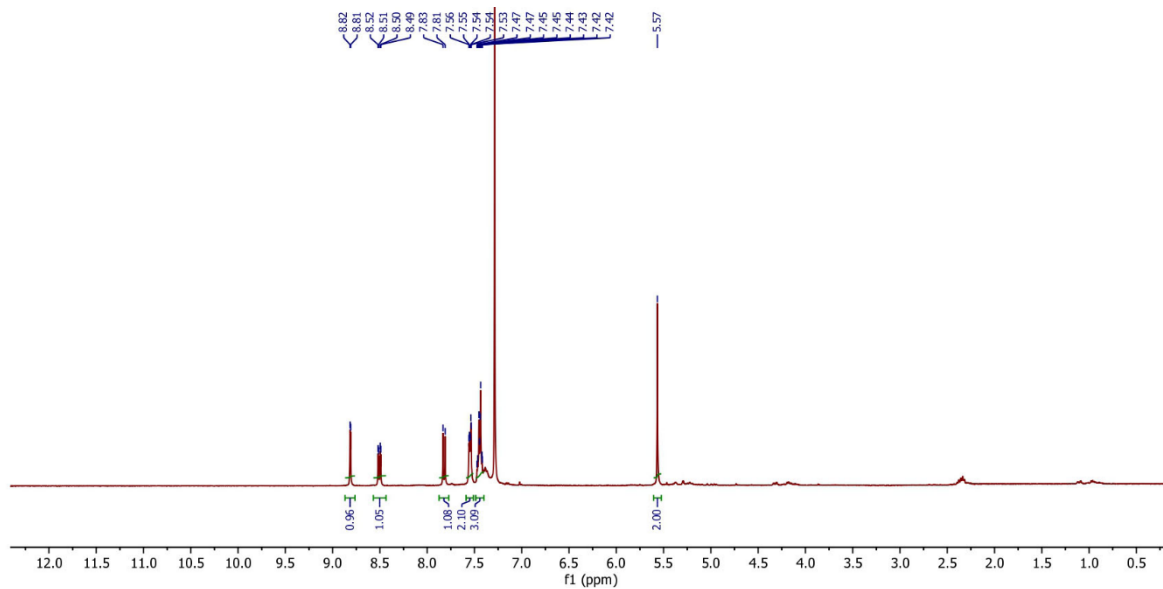

<sup>1</sup>H NMR Spectrum of **5o** (400 MHz, CDCl<sub>3</sub>)

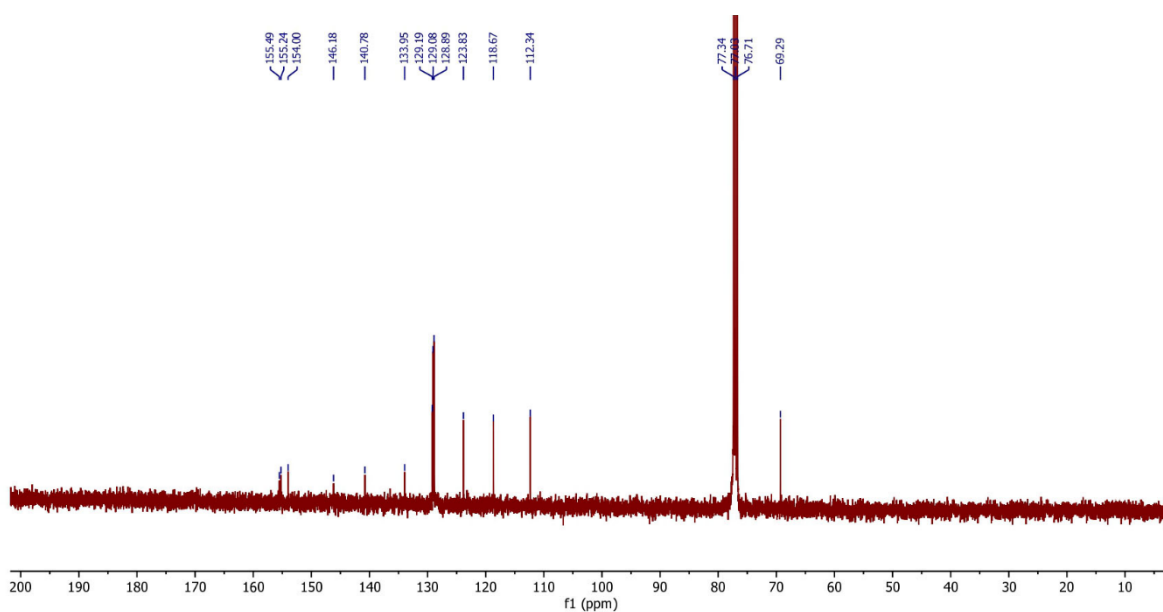

<sup>13</sup>C NMR Spectrum of **5o** (101 MHz, CDCl<sub>3</sub>)

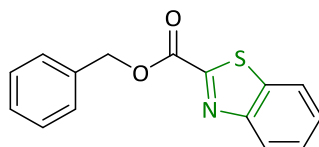

Benzyl benzo[d]thiazole-2-carboxylate (6a)

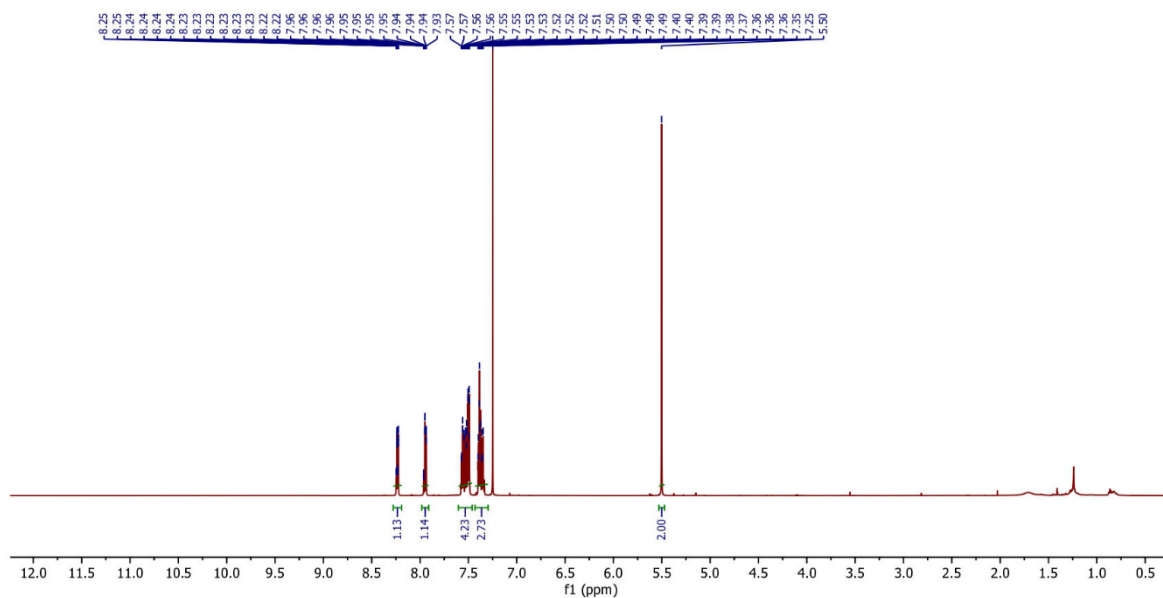

<sup>1</sup>H NMR Spectrum of 6a (600 MHz, CDCl<sub>3</sub>)

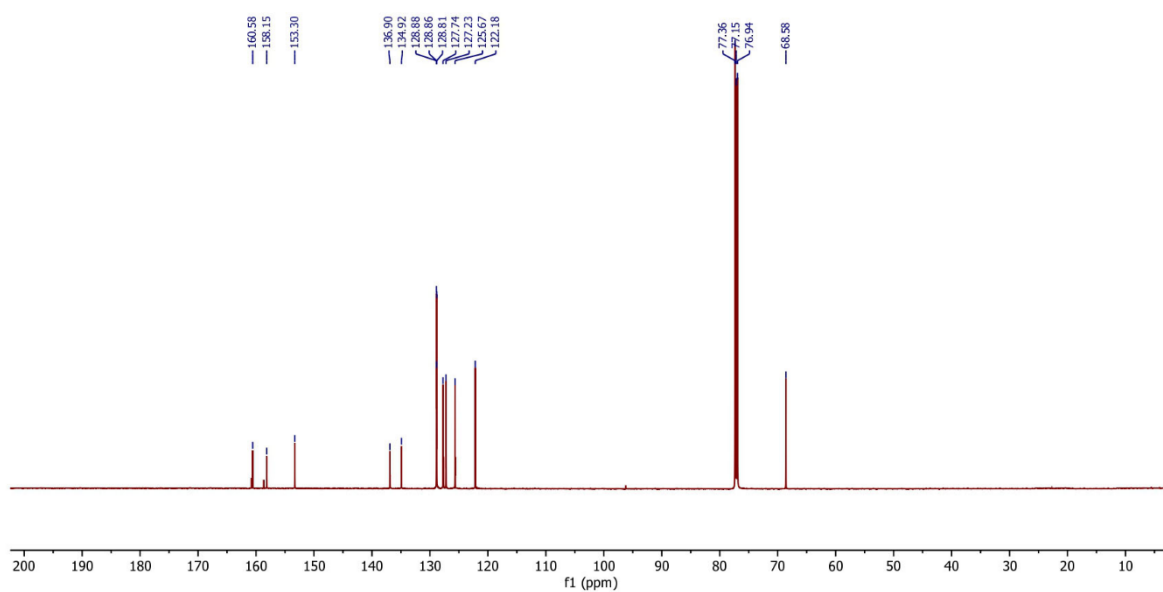

<sup>13</sup>C NMR Spectrum of 6a (151 MHz, CDCl<sub>3</sub>)



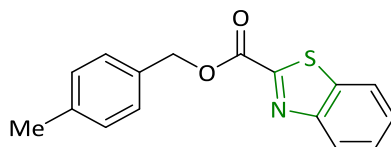

**4-methylbenzyl benzo[d]thiazole-2-carboxylate (6c)**

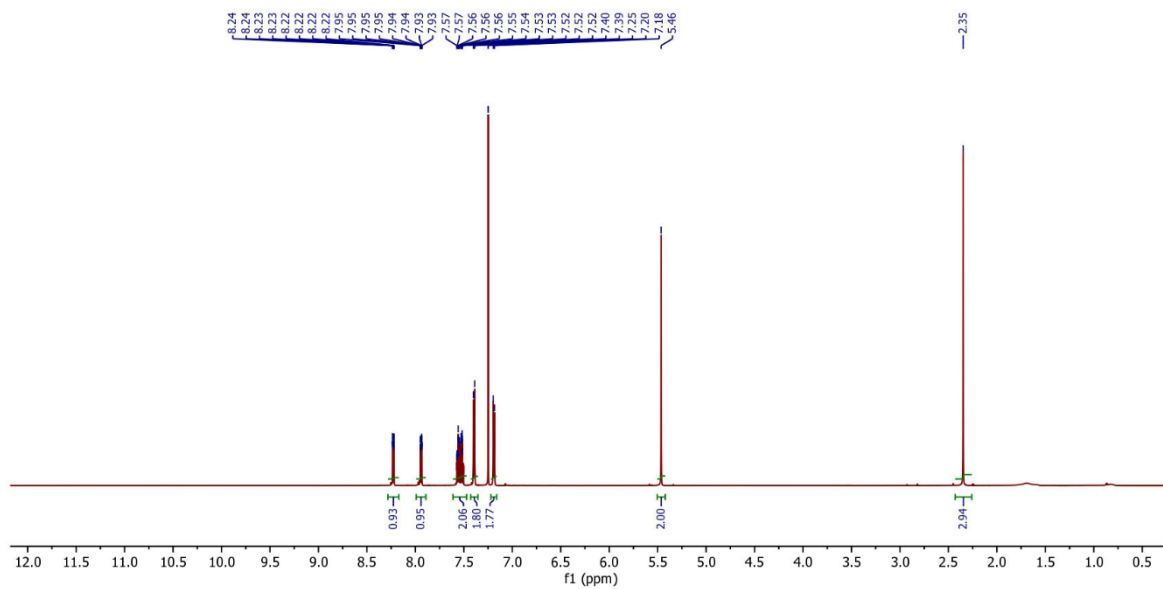

$^1\text{H}$  NMR Spectrum of **6c** (600 MHz,  $\text{CDCl}_3$ )

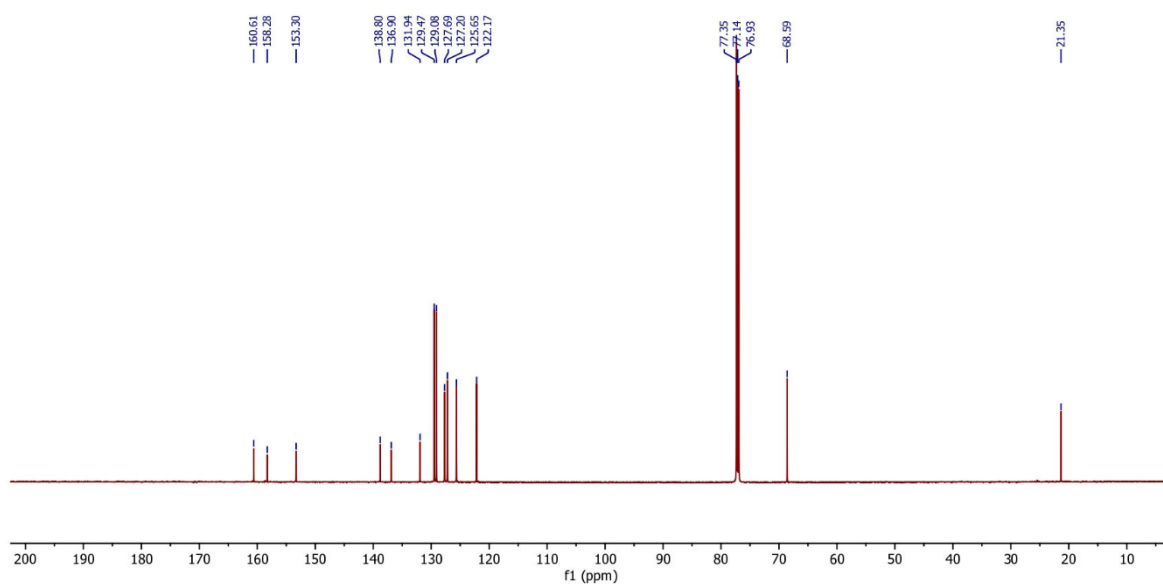

$^{13}\text{C}$  NMR Spectrum of **6c** (151 MHz,  $\text{CDCl}_3$ )

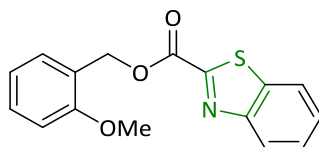

**2-methoxybenzyl benzo[d]thiazole-2-carboxylate (6d)**

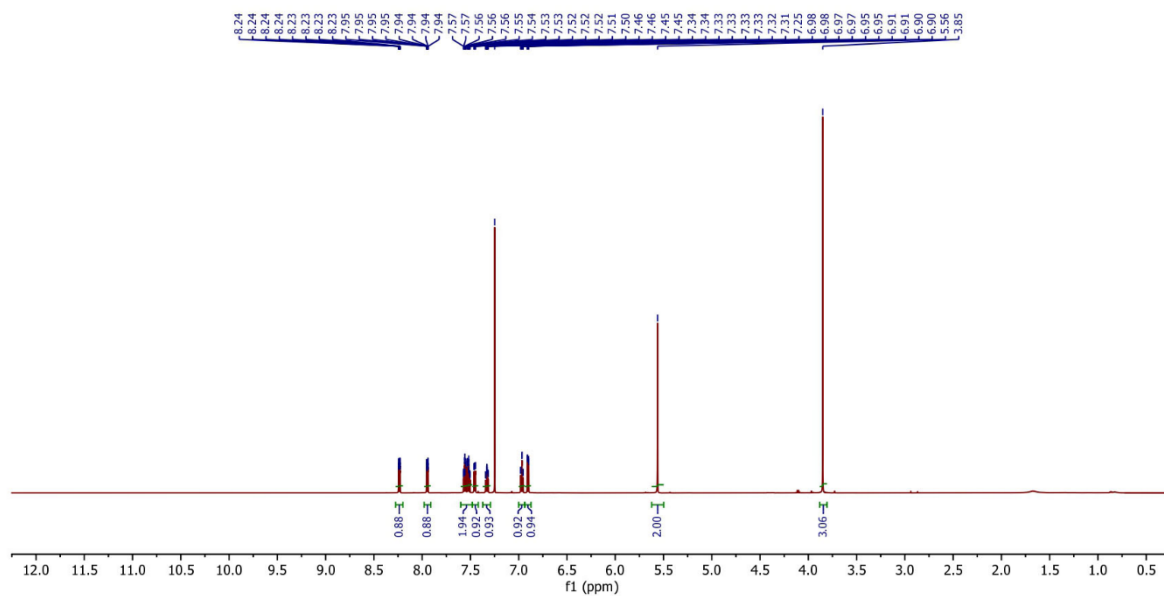

$^1\text{H}$  NMR Spectrum of **6d** (600 MHz,  $\text{CDCl}_3$ )

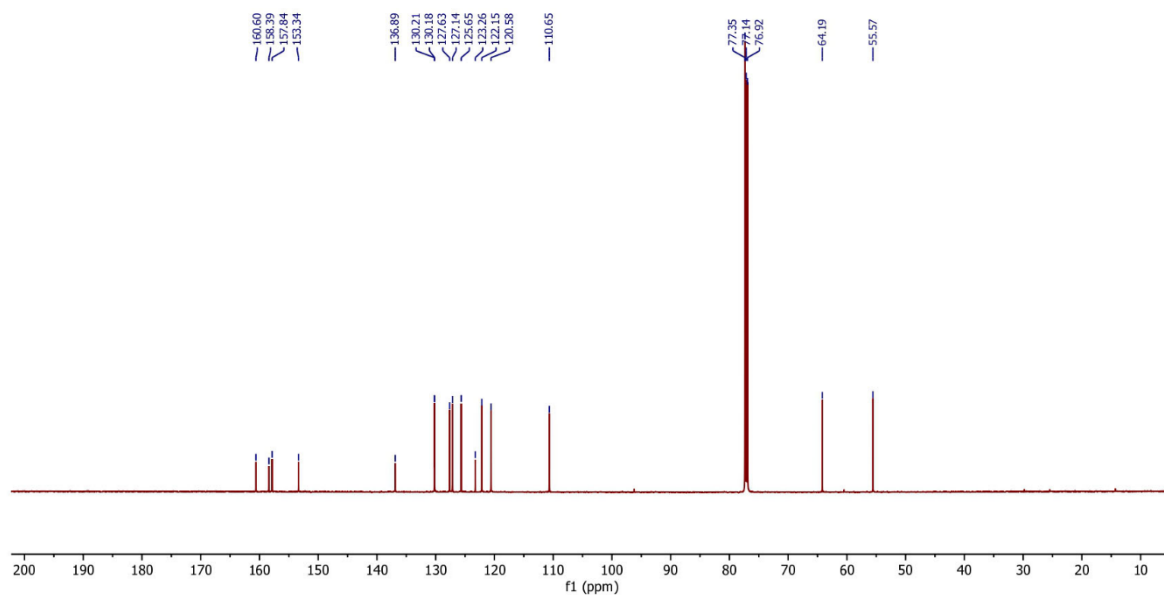

$^{13}\text{C}$  NMR Spectrum of **6d** (151 MHz,  $\text{CDCl}_3$ )

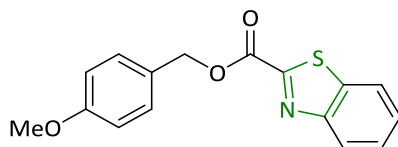

4-methoxybenzyl benzo[d]thiazole-2-carboxylate (**6e**)

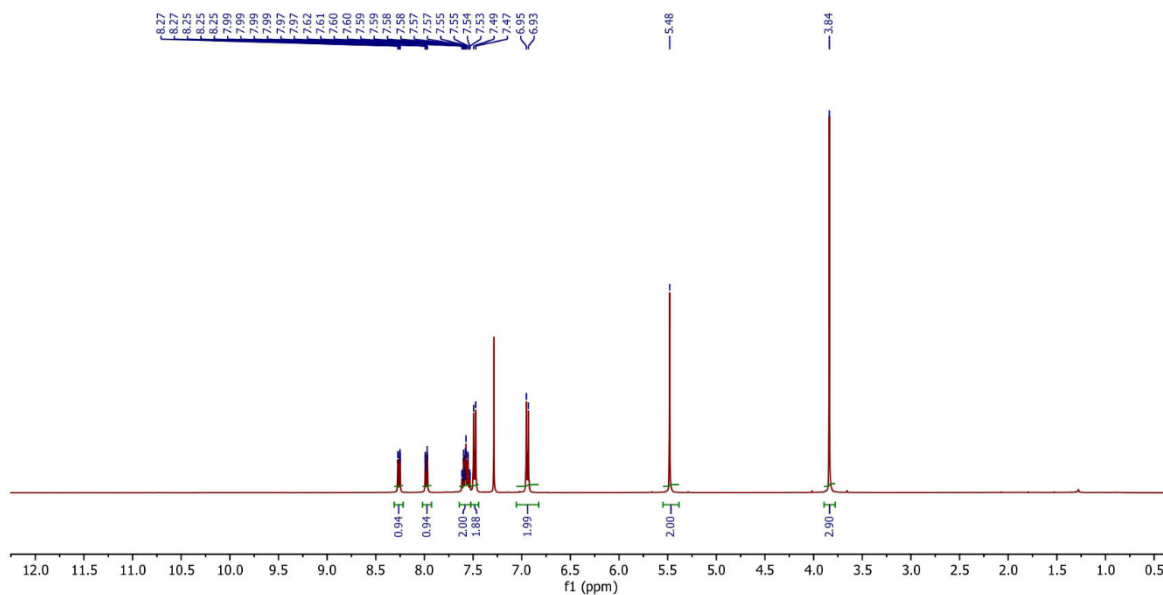

<sup>1</sup>H NMR Spectrum of **6e** (400 MHz, CDCl<sub>3</sub>)

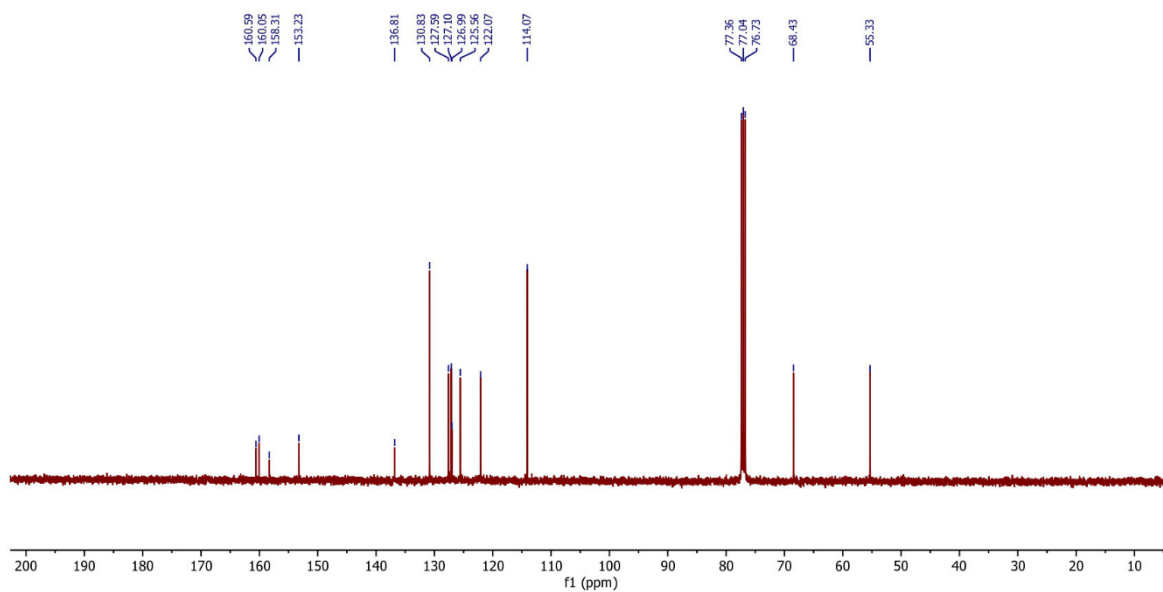

<sup>13</sup>C NMR Spectrum of **6e** (101 MHz, CDCl<sub>3</sub>)

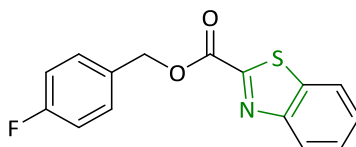

**4-fluorobenzyl benzo[d]thiazole-2-carboxylate (6f)**

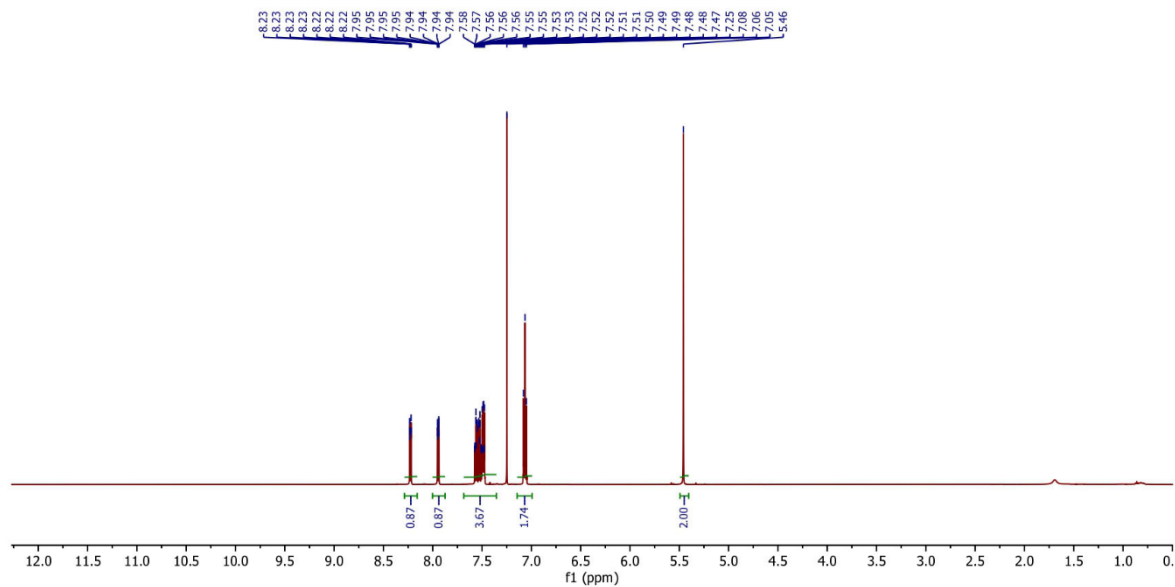

<sup>1</sup>H NMR Spectrum of **6f** (600 MHz, CDCl<sub>3</sub>)

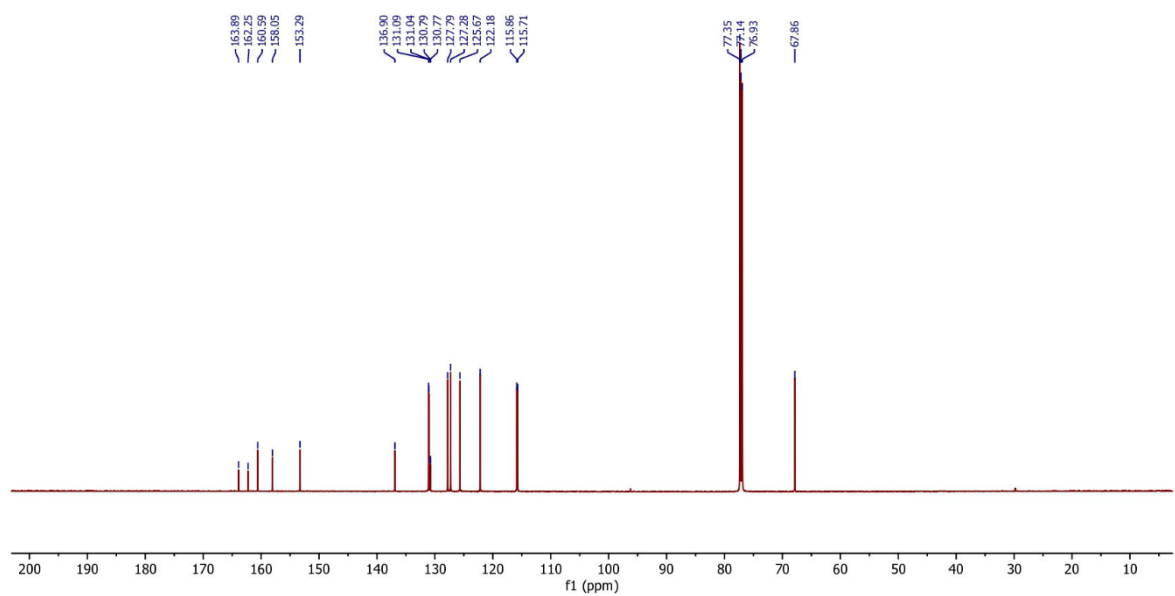

<sup>13</sup>C NMR Spectrum of **6f** (151 MHz, CDCl<sub>3</sub>)

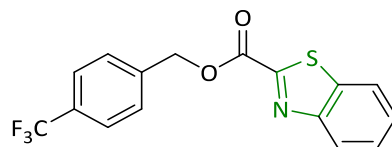

**4-(trifluoromethyl)benzyl benzo[d]thiazole-2-carboxylate (6g)**

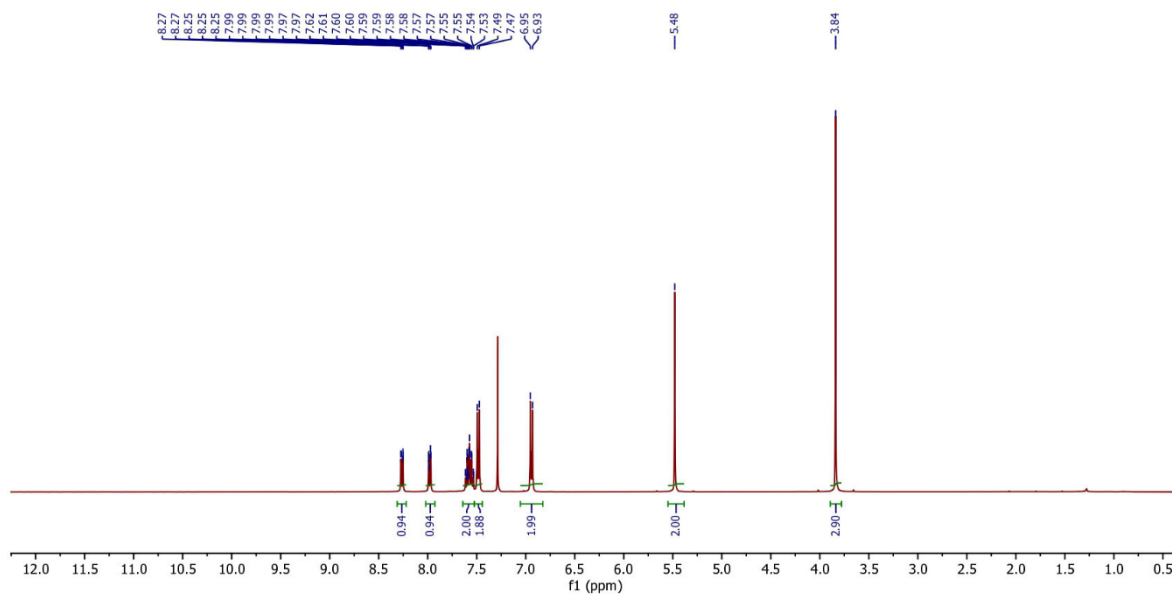

$^1\text{H}$  NMR Spectrum of **6g** (400 MHz,  $\text{CDCl}_3$ )

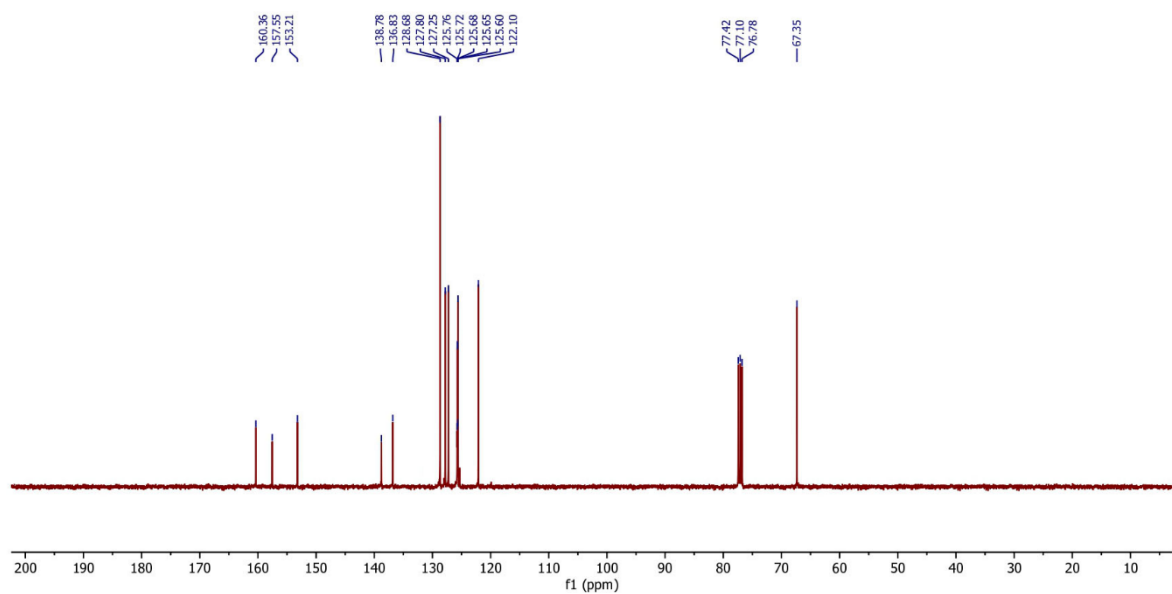

$^{13}\text{C}$  NMR Spectrum of **6g** (101 MHz,  $\text{CDCl}_3$ )



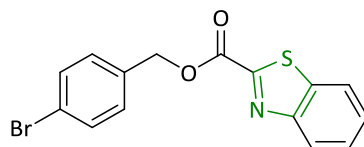

4-bromobenzyl benzo[d]thiazole-2-carboxylate (**6i**)

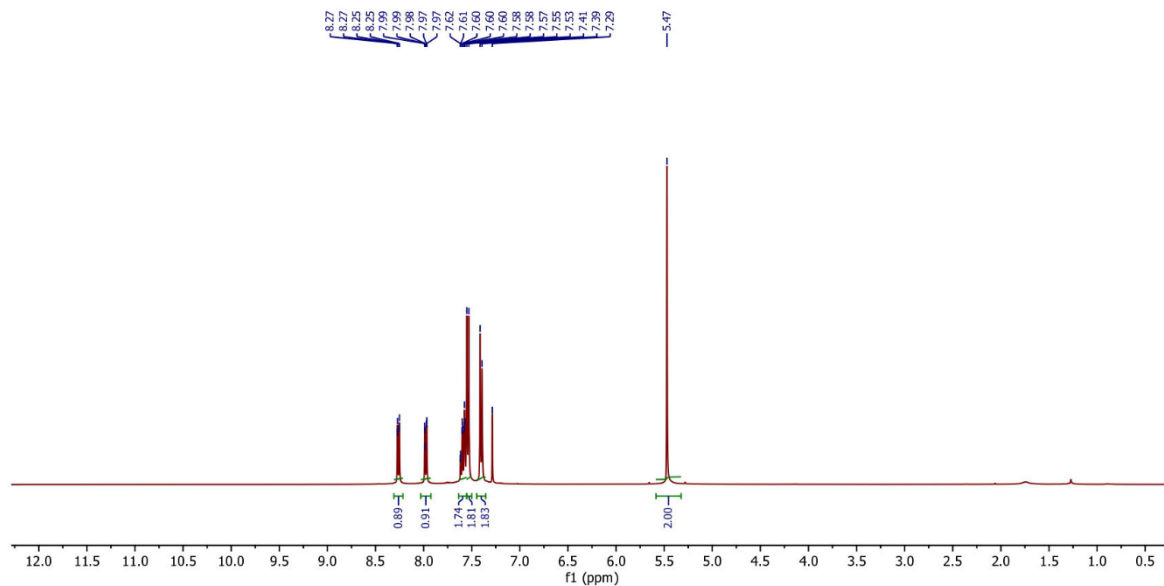

<sup>1</sup>H NMR Spectrum of **6i** (600 MHz, CDCl<sub>3</sub>)

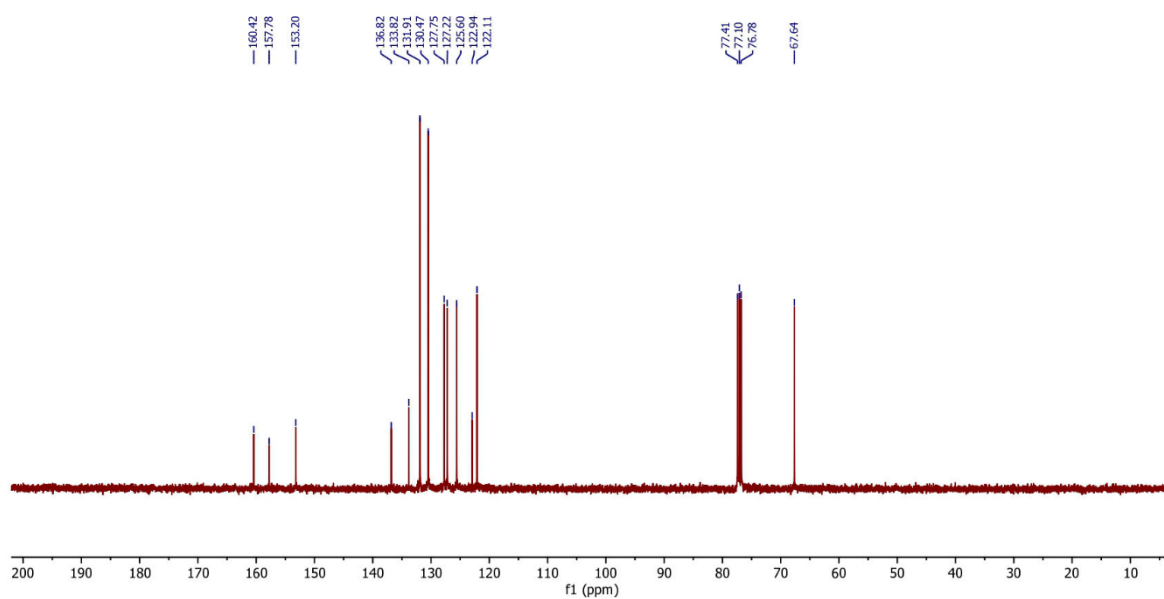

<sup>13</sup>C NMR Spectrum of **6i** (151 MHz, CDCl<sub>3</sub>)

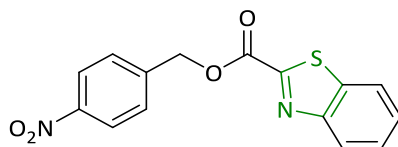

4-nitrobenzyl benzo[d]thiazole-2-carboxylate (**6j**)

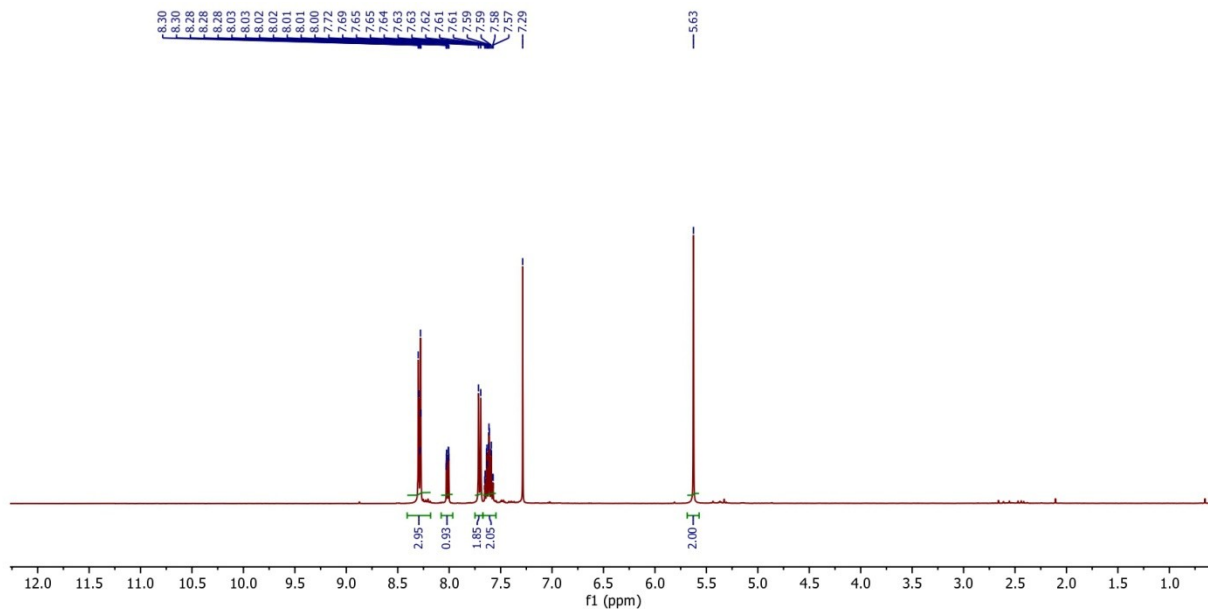

$^1\text{H}$  NMR Spectrum of **6j** (400 MHz,  $\text{CDCl}_3$ )

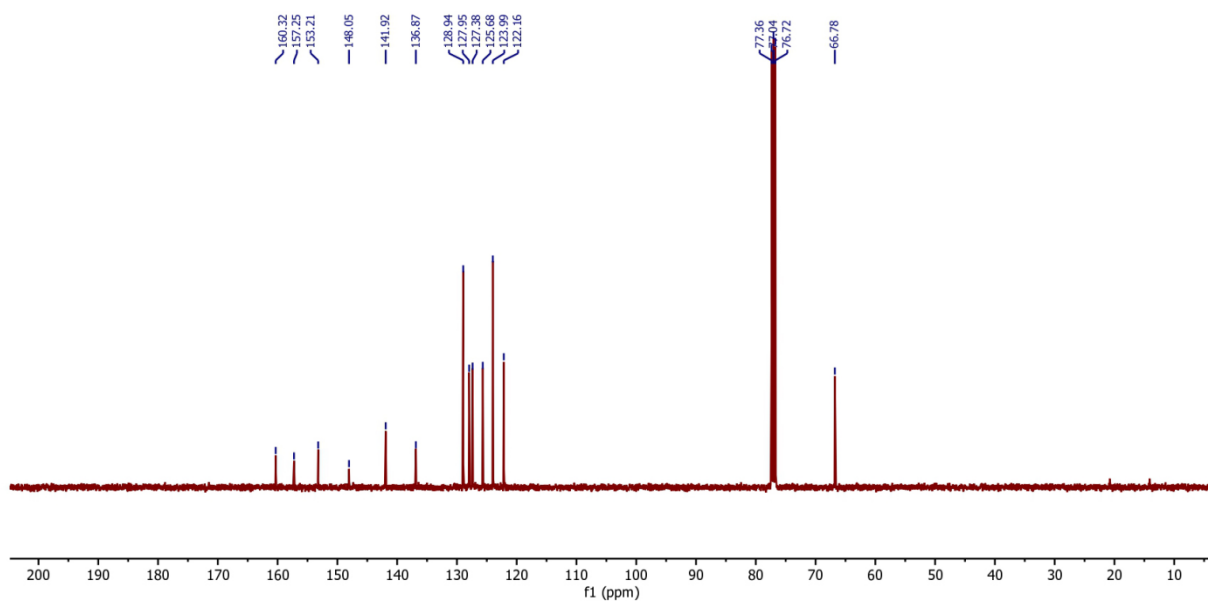

$^{13}\text{C}$  NMR Spectrum of **6j** (101 MHz,  $\text{CDCl}_3$ )

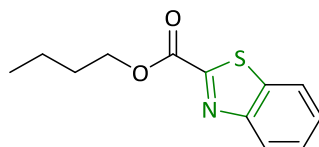

**Butyl benzo[d]thiazole-2-carboxylate (6k)**

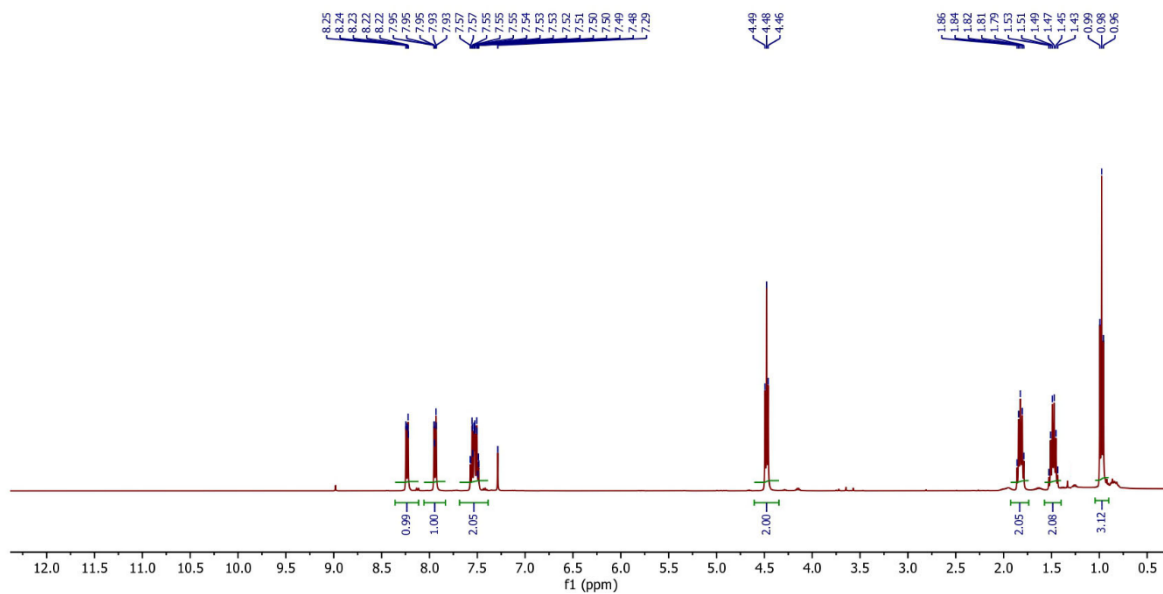

<sup>1</sup>H NMR Spectrum of **6k** (400 MHz, CDCl<sub>3</sub>)

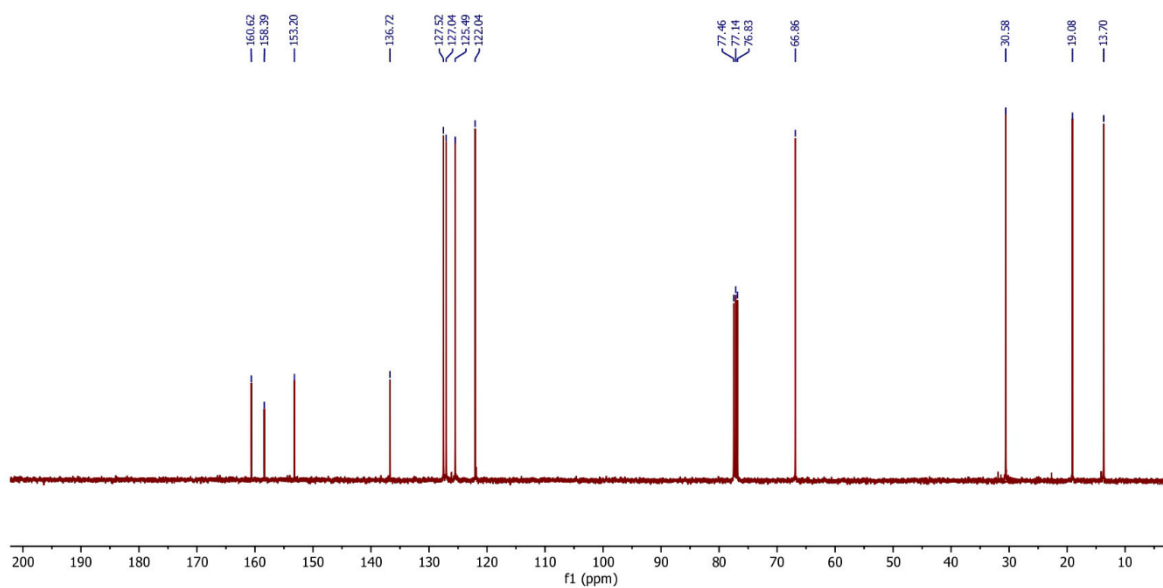

<sup>13</sup>C NMR Spectrum of **6k** (101 MHz, CDCl<sub>3</sub>)

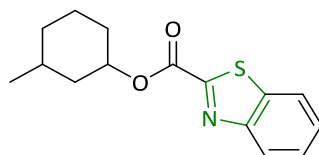

### 3-methylcyclohexyl benzo[d]thiazole-2-carboxylate (**61**)

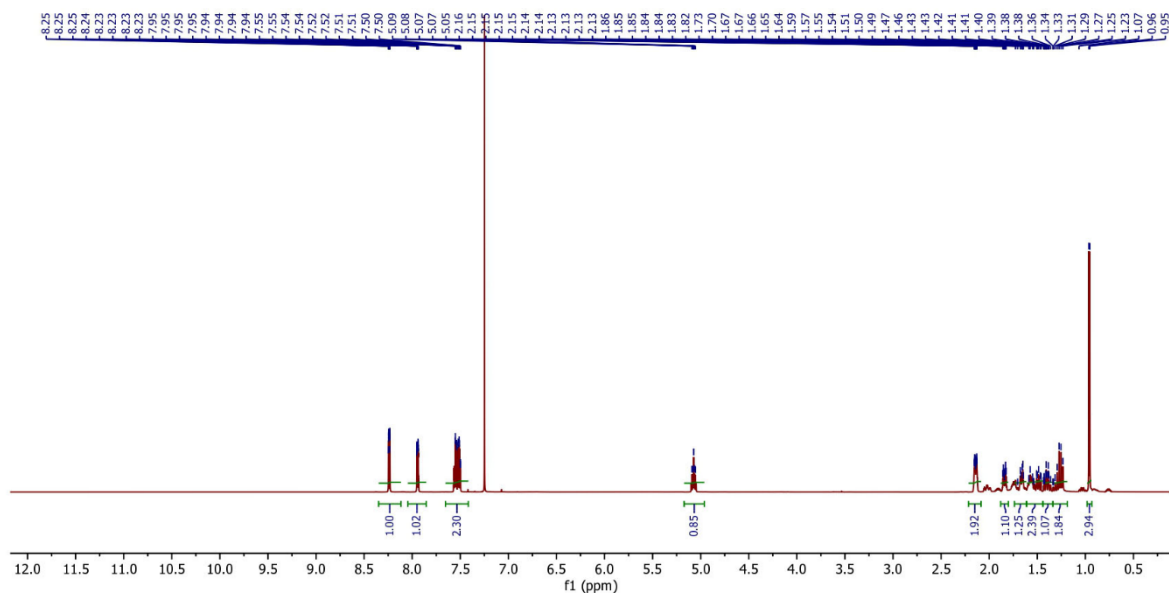

$^1\text{H}$  NMR Spectrum of **61** (600 MHz,  $\text{CDCl}_3$ )

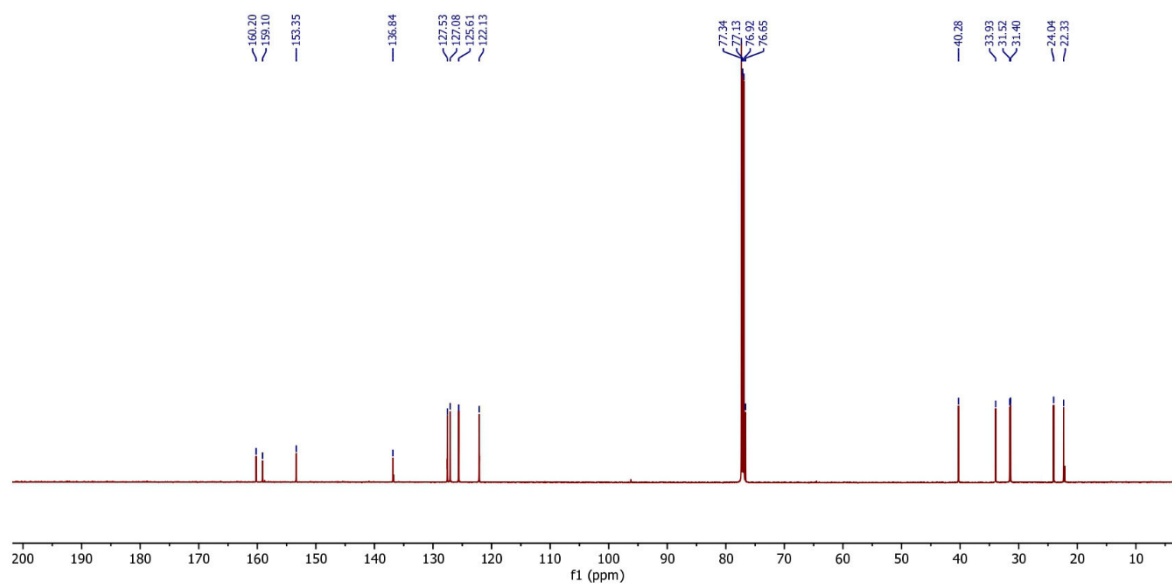

$^{13}\text{C}$  NMR Spectrum of **61** (151 MHz,  $\text{CDCl}_3$ )

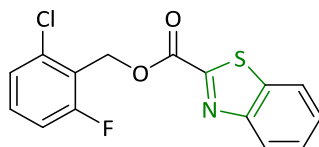

**2-chloro-6-fluorobenzyl benzo[d]thiazole-2-carboxylate (6m)**

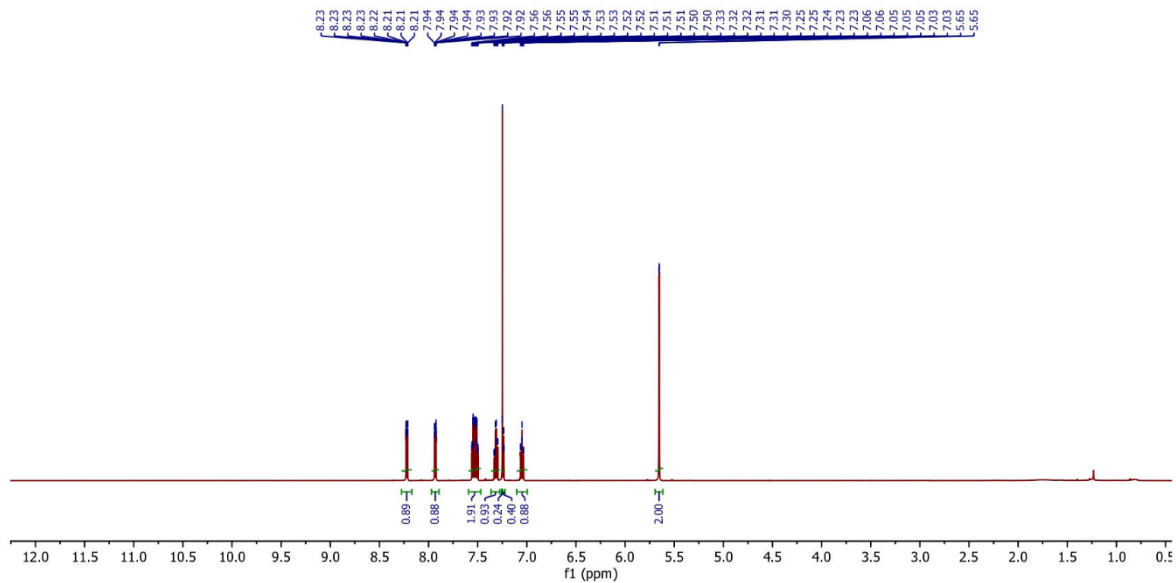

<sup>1</sup>H NMR Spectrum of **6m** (600 MHz, CDCl<sub>3</sub>)

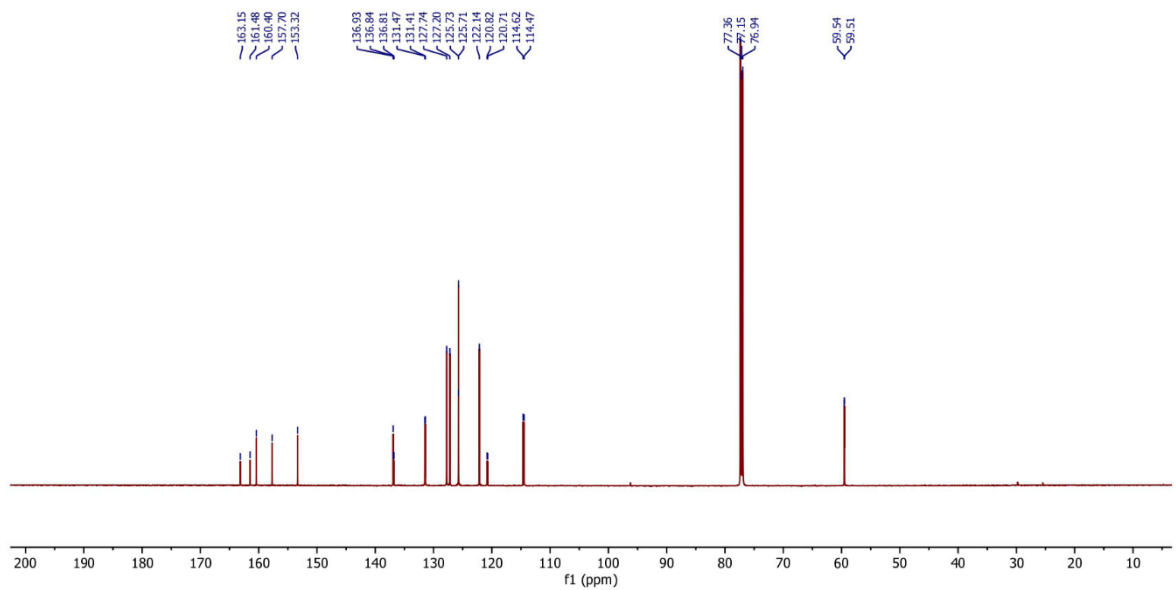

<sup>13</sup>C NMR Spectrum of **6m** (151 MHz, CDCl<sub>3</sub>)

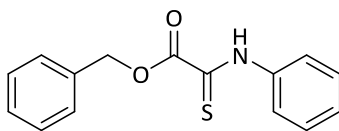

Benzyl 2-(phenylamino)-2-thioacetate (7a)

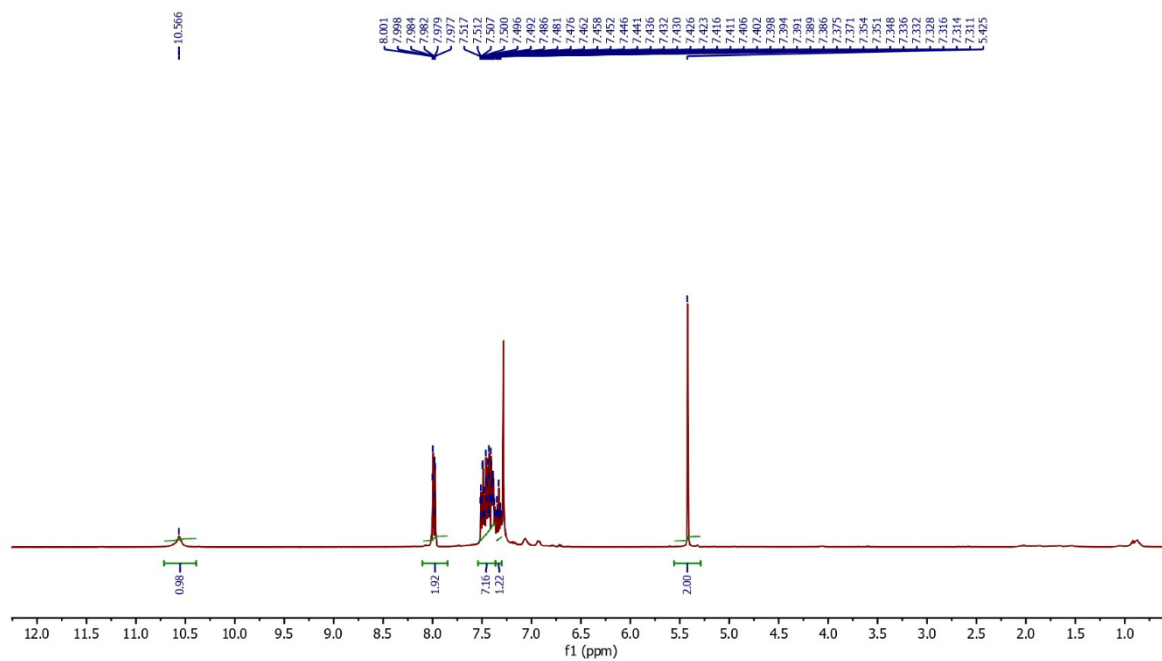

<sup>1</sup>H NMR Spectrum of 7a (400 MHz, CDCl<sub>3</sub>)

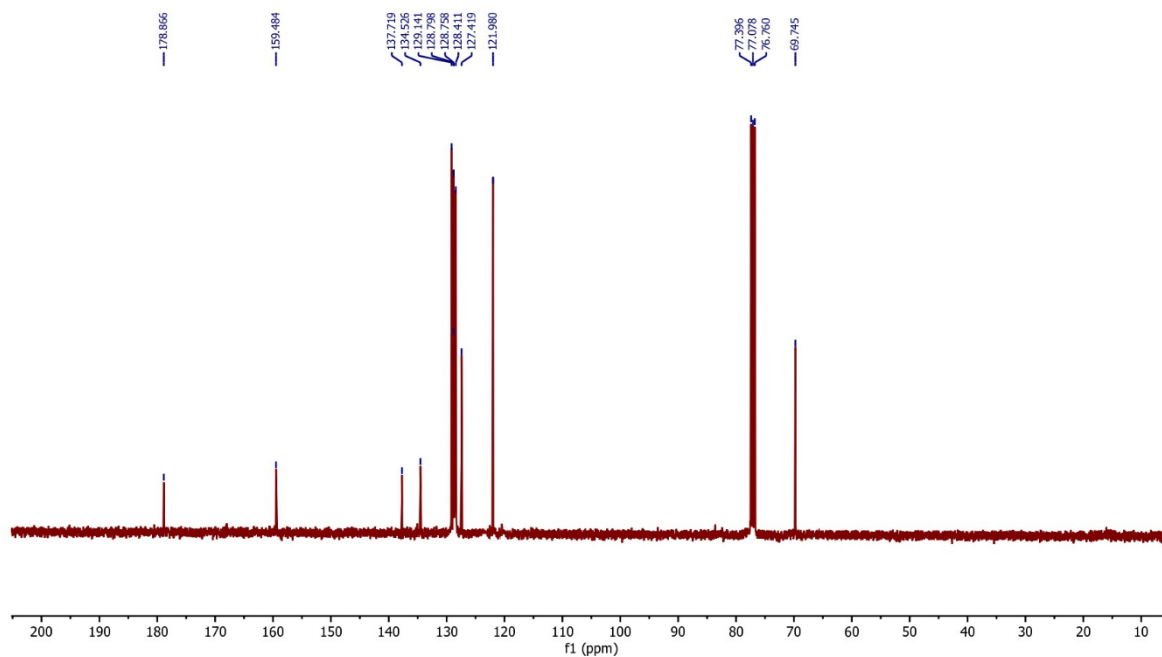

<sup>13</sup>C NMR Spectrum of 7a (101 MHz, CDCl<sub>3</sub>)

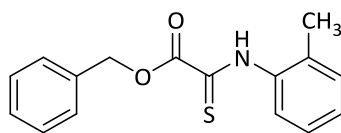

**Benzyl 2-thioxo-2-(*o*-tolylamino)acetate (7b)**

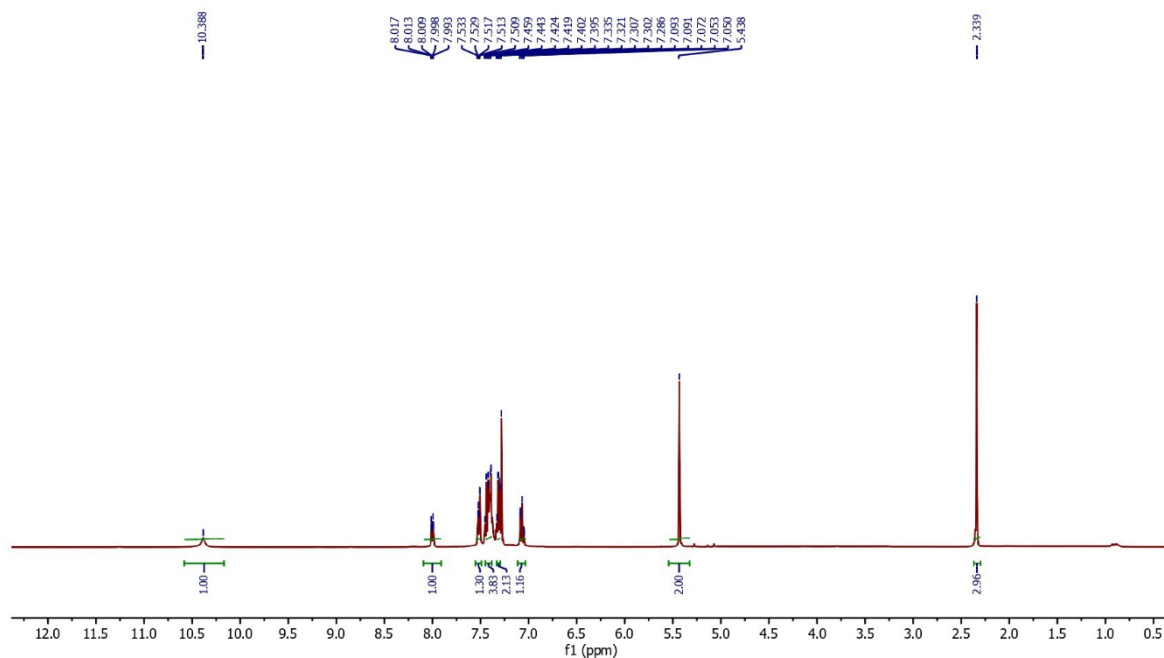

$^1\text{H}$  NMR Spectrum of **7b** (400 MHz,  $\text{CDCl}_3$ )

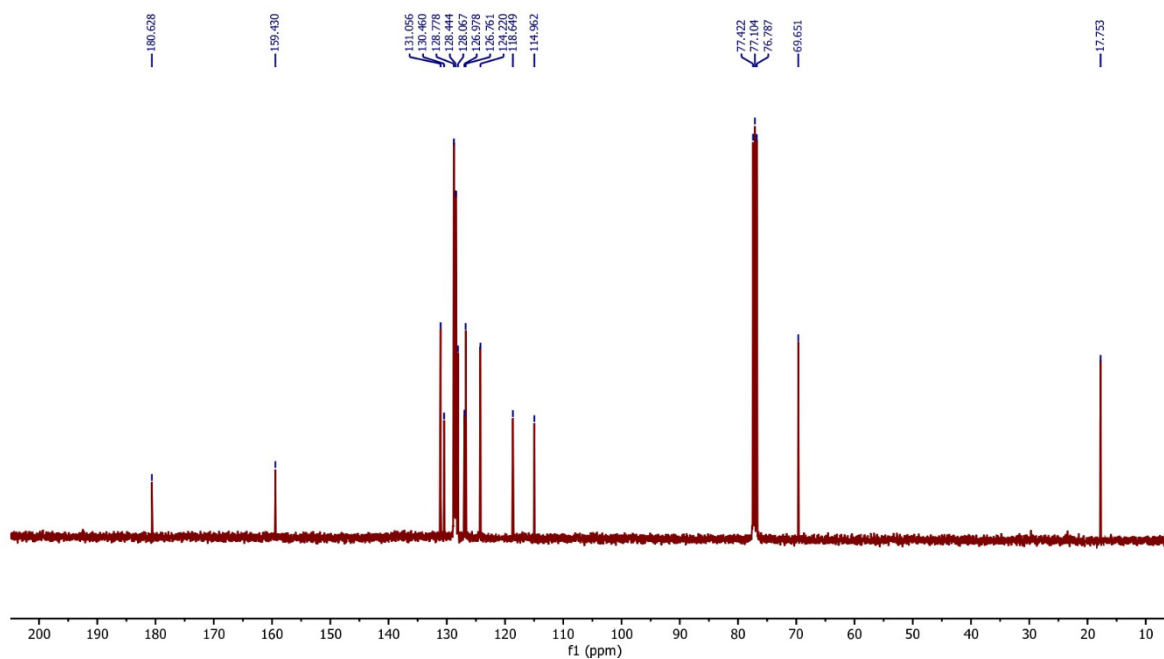

$^{13}\text{C}$  NMR Spectrum of **7b** (101 MHz,  $\text{CDCl}_3$ )

**Table Percentage cell viability of SH-SY5Y cells treated with benzazole derivatives**

| Compound | Sample Concentration ( $\mu\text{g/ml}$ ) |                       |                     |                     |                      |
|----------|-------------------------------------------|-----------------------|---------------------|---------------------|----------------------|
|          | 6.25 $\mu\text{g/ml}$                     | 12.5 $\mu\text{g/ml}$ | 25 $\mu\text{g/ml}$ | 50 $\mu\text{g/ml}$ | 100 $\mu\text{g/ml}$ |
| 4a       | 92.75272                                  | 89.39347              | 76.36081            | 57.57387            | 15.08554             |
| 4b       | 99.12908                                  | 97.32504              | 94.74339            | 87.15397            | 71.66407             |
| 4c       | 99.62675                                  | 99.06687              | 97.7605             | 97.23173            | 96.01866             |
| 4d       | 99.0743                                   | 98.5284               | 98.1063             | 96.6585             | 95.4628              |
| 4e       | 98.8347                                   | 98.2639               | 97.7448             | 96.3357             | 95.0875              |
| 4f       | 95.9432                                   | 89.9827               | 82.0539             | 71.894              | 65.3382              |
| 4g       | 99.0386                                   | 98.9522               | 98.4853             | 92.4725             | 88.6624              |
| 4h       | 99.4472                                   | 99.0684               | 98.8143             | 98.0592             | 96.0361              |
| 4i       | 99.9689                                   | 99.50233              | 99.19129            | 98.69362            | 98.00933             |
| 4j       | 98.6401                                   | 96.0153               | 96.9802             | 92.5294             | 89.8503              |
| 4k       | 96.8362                                   | 92.0157               | 85.0439             | 84.8953             | 78.0335              |
| 4l       | 99.37792                                  | 98.78694              | 97.54277            | 95.61431            | 93.43701             |
| 4m       | 89.0571                                   | 86.982                | 85.4862             | 70.0672             | 73.4491              |
| 4n       | 99.56454                                  | 98.91135              | 97.72939            | 94.33904            | 91.35303             |
| 4o       | 99.44012                                  | 99.19129              | 98.32037            | 97.57387            | 96.45412             |
| 4p       | 97.0471                                   | 96.893                | 88.9412             | 80.9447             | 80.0286              |
| 5a       | 99.72006                                  | 98.69362              | 91.97512            | 84.60342            | 57.54277             |
| 5b       | 98.9875                                   | 98.6843               | 95.8367             | 89.0544             | 89.8952              |
| 5c       | 99.34681                                  | 98.32037              | 97.38725            | 96.45412            | 93.12597             |
| 5d       | 94.4812                                   | 90.7915               | 81.8669             | 65.1529             | 35.1624              |
| 5e       | 99.4323                                   | 97.2879               | 92.6521             | 75.9381             | 48.1866              |
| 5f       | 97.8362                                   | 89.9873               | 83.863              | 62.8776             | 28.9632              |
| 5g       | 99.5584                                   | 90.4761               | 84.8943             | 69.2841             | 42.2894              |
| 5h       | 92.75272                                  | 89.39347              | 76.36081            | 57.57387            | 15.08554             |
| 5i       | 99.37792                                  | 98.78694              | 97.54277            | 95.61431            | 93.43701             |
| 5j       | 94.48124                                  | 90.79155              | 81.86692            | 65.15295            | 35.16241             |
| 5k       | 99.43236                                  | 97.28792              | 92.65216            | 75.93819            | 48.18669             |
| 5l       | 96.9965                                   | 96.4345               | 89.8623             | 74.9853             | 79.8465              |
| 5m       | 99.5585                                   | 90.47619              | 84.89436            | 69.28414            | 42.2895              |
| 5n       | 99.5782                                   | 98.0625               | 94.0531             | 94.9762             | 90.0642              |
| 5o       | 98.0736                                   | 97.8634               | 89.9374             | 78.3574             | 65.925               |
| 6a       | 99.84232                                  | 92.74677              | 92.39987            | 90.06623            | 83.60139             |
| 6b       | 98.61243                                  | 96.90949              | 92.90445            | 90.50773            | 86.12425             |
| 6c       | 98.61243                                  | 96.90949              | 92.90445            | 90.50773            | 86.12425             |
| 6d       | 99.49543                                  | 96.94103              | 92.80984            | 78.52412            | 59.57111             |
| 6e       | 99.21161                                  | 97.91864              | 97.13024            | 95.71113            | 92.52602             |
| 6f       | 98.92778                                  | 97.57174              | 92.24219            | 80.44781            | 57.67897             |
| 6g       | 98.5472                                   | 97.4327               | 91.747              | 82.8735             | 76.9867              |
| 6h       | 98.61243                                  | 96.90949              | 92.90445            | 90.50773            | 86.12425             |
| 6i       | 94.48124                                  | 90.79155              | 81.86692            | 65.15295            | 35.16241             |
| 6j       | 99.5584                                   | 90.4761               | 84.8943             | 69.2841             | 42.2894              |
| 6k       | 99.0476                                   | 98.5228               | 93.0456             | 93.6854             | 90.7161              |

|           |          |          |          |          |          |
|-----------|----------|----------|----------|----------|----------|
| <b>6l</b> | 99.37792 | 98.78694 | 97.54277 | 95.61431 | 93.43701 |
| <b>6m</b> | 98.61243 | 96.90949 | 92.90445 | 90.50773 | 86.12425 |

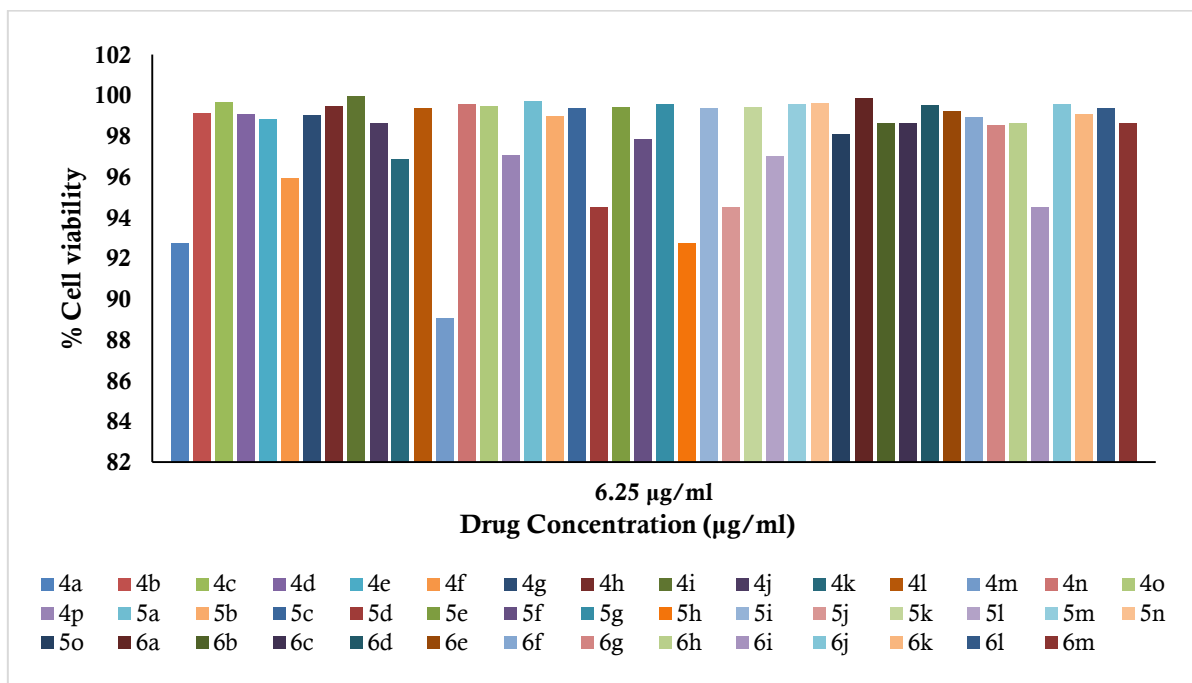

**Fig. 1** Percentage cell viability of SH-SY5Y cells treated with benzazole derivatives at 6.25 µM

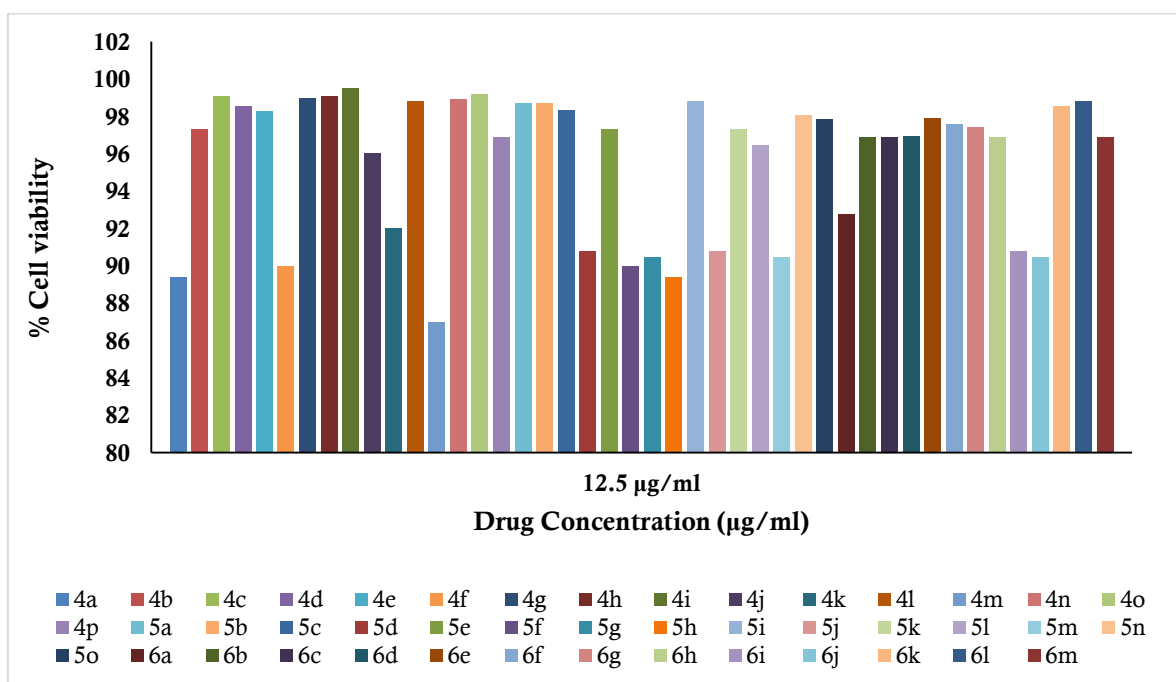

**Fig. 2** Percentage cell viability of SH-SY5Y cells treated with benzazole derivatives at 12.5 µM

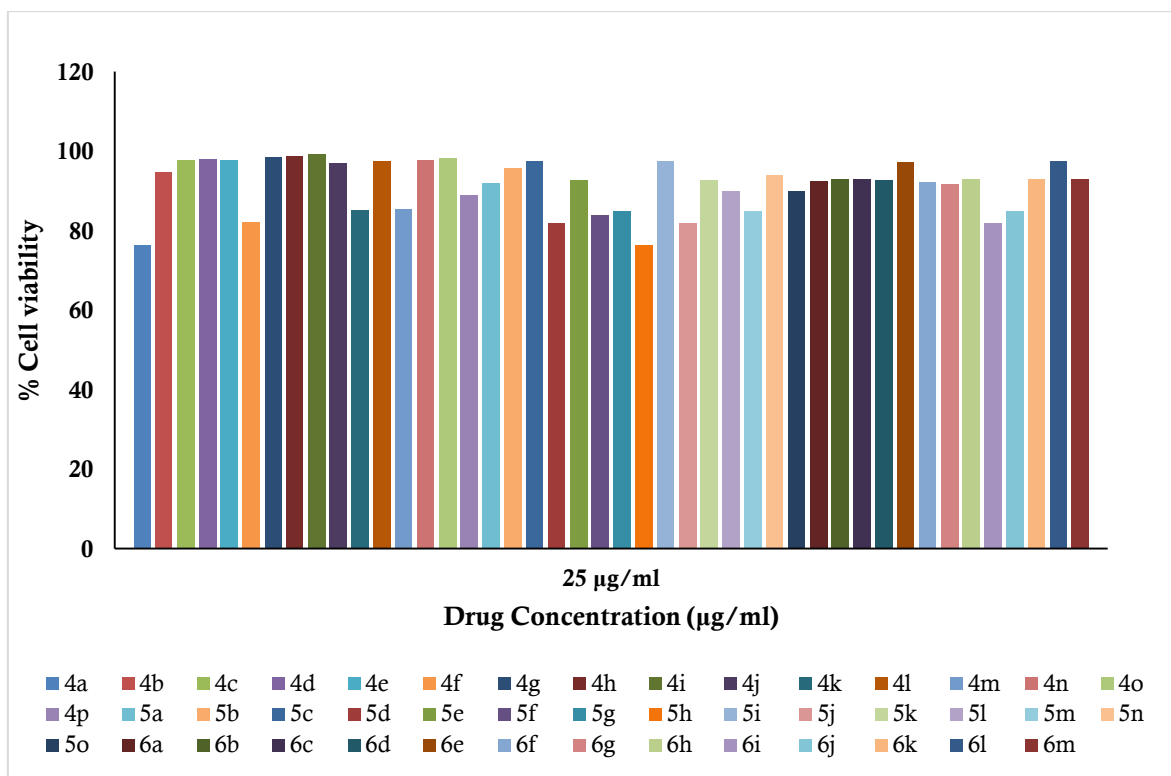

**Fig. 3** Percentage cell viability of SH-SY5Y cells treated with benzazole derivatives at 25 µM

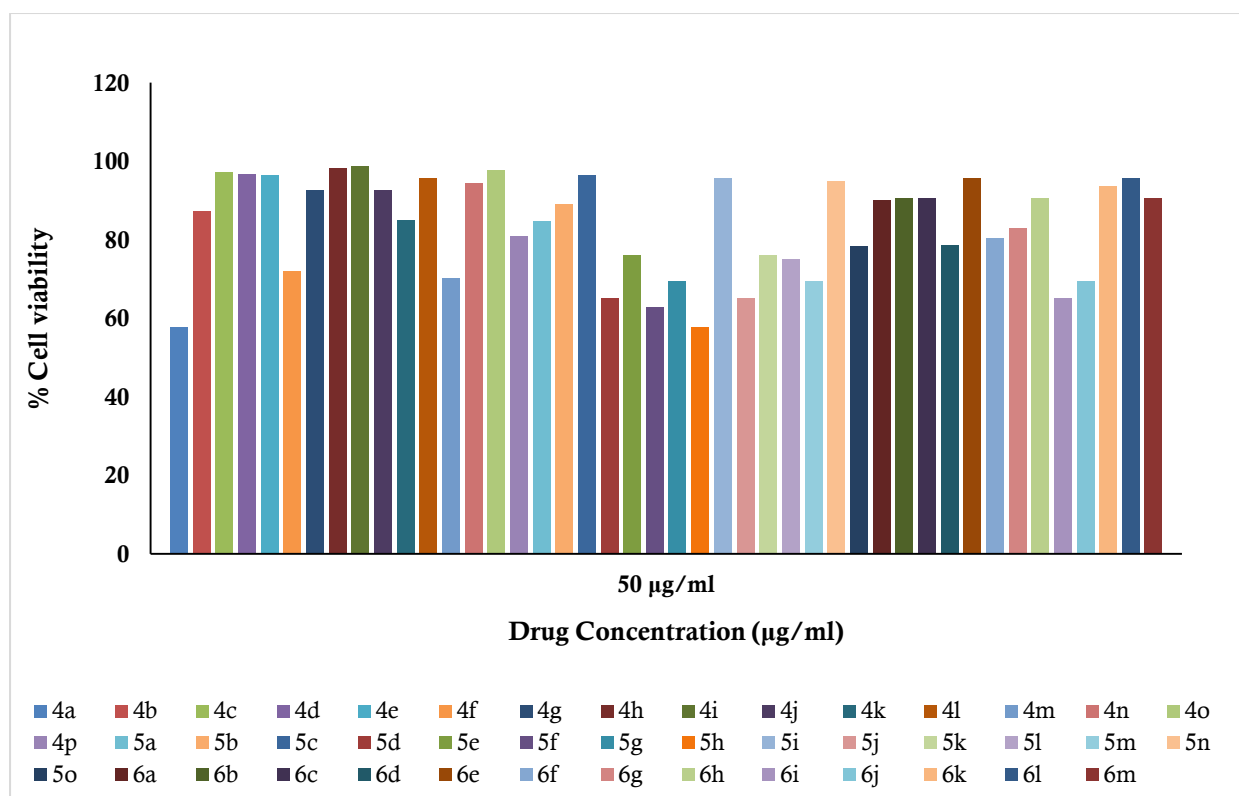

**Fig. 4** Percentage cell viability of SH-SY5Y cells treated with benzazole derivatives at 50 µM

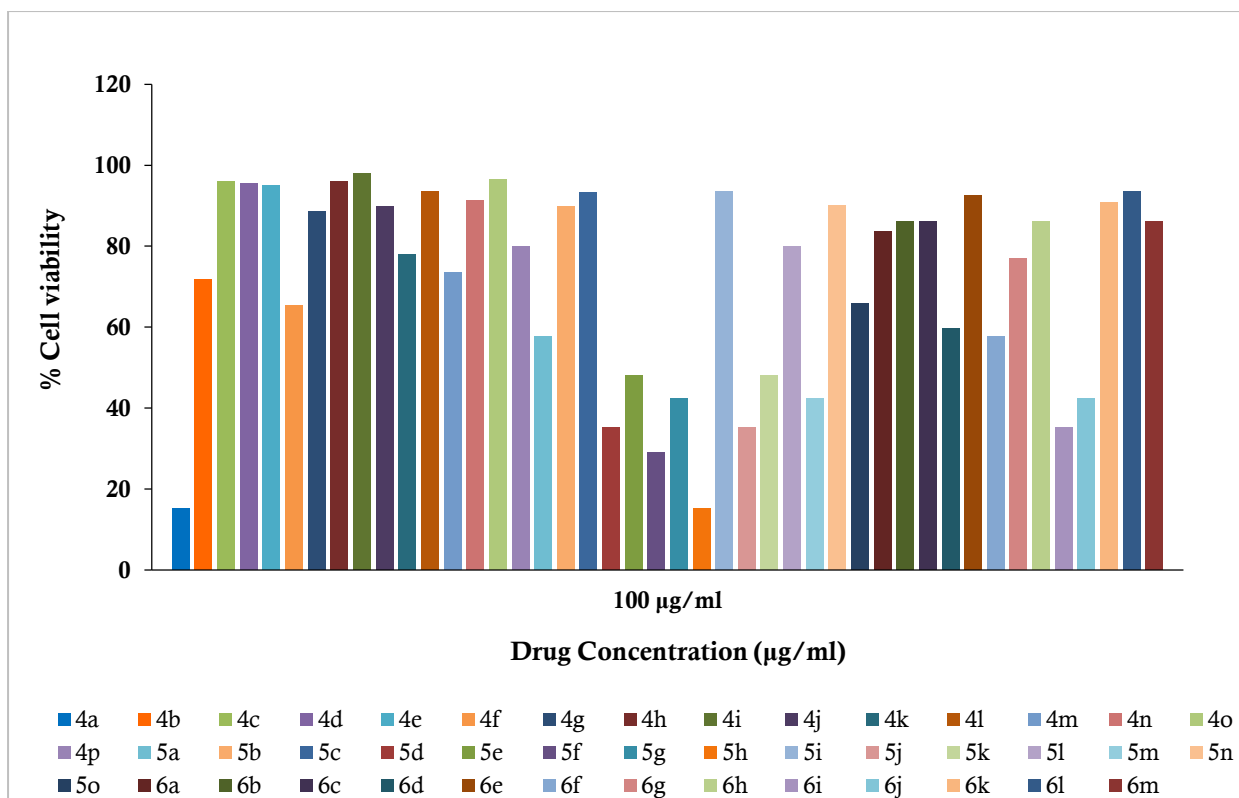

**Fig. 5** Percentage cell viability of SH-SY5Y cells treated with benzazole derivatives at 100 µM

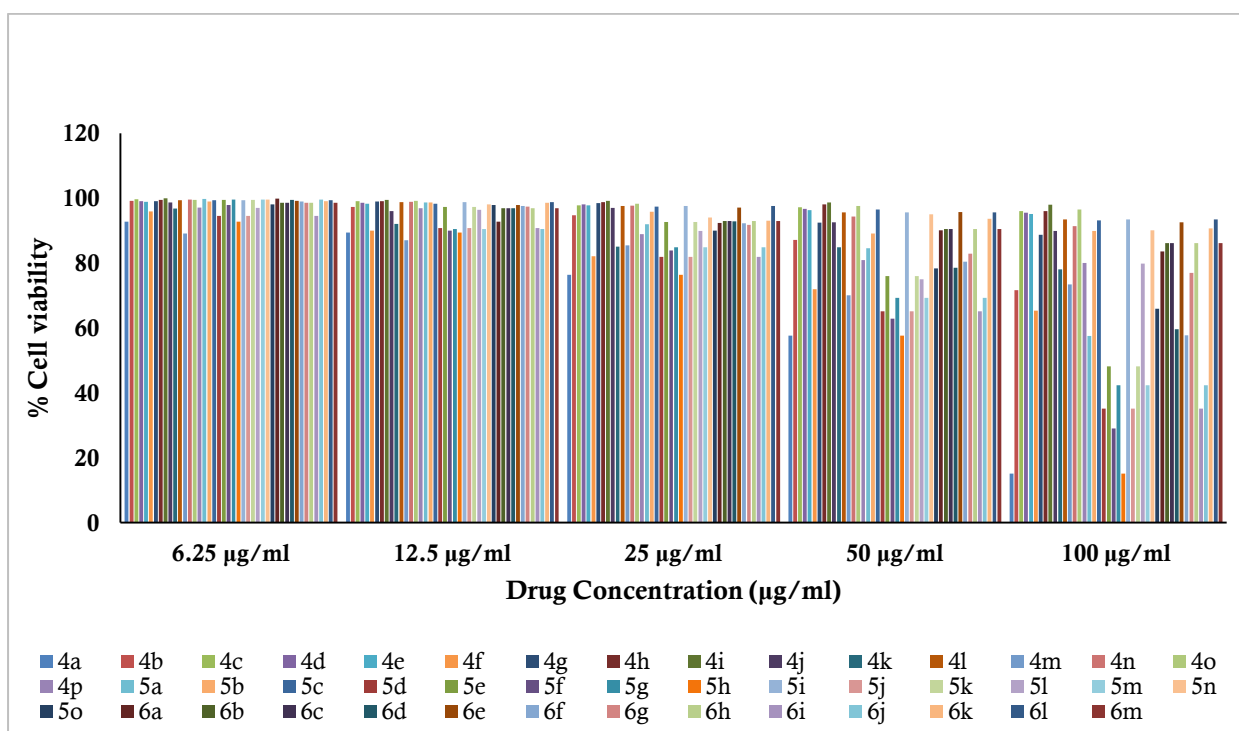

**Fig. 6** Percentage cell viability of SH-SY5Y cells treated with benzazole derivatives at 6.25-100 µM

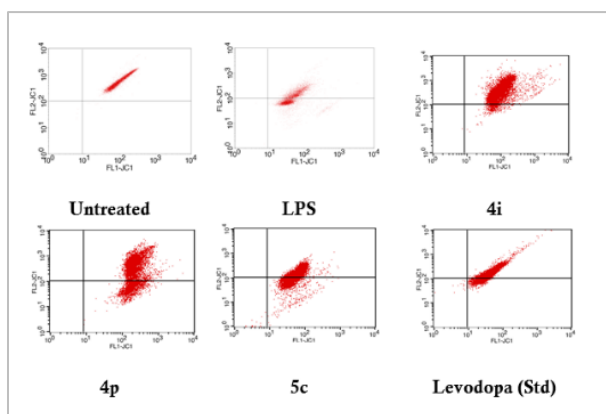

**Fig. 7** Quadrant analysis of JC-1 staining showing  $\Delta\psi_m$  in untreated SH-SY5Y cells, LPS-induced cells, and LPS-induced SH-SY5Y cells treated with compounds **4i**, **4n**, **5c**, and levodopa, analyzed using FL1-JC-1 and FL2-JC-1 channels.

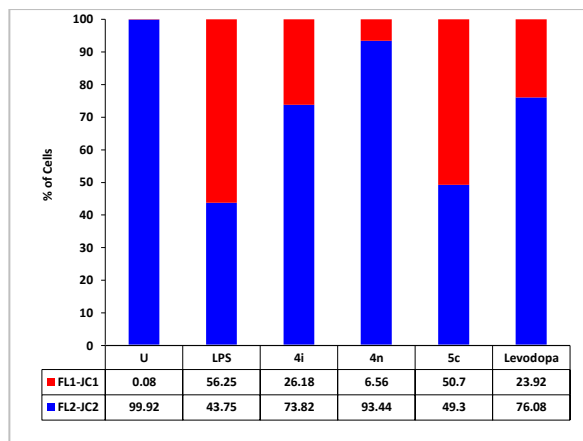

**Fig. 8** JC-1 assay showing  $\Delta\psi_m$  in LPS-induced SH-SY5Y cells treated with compounds **4d**, **4e**, **5b**, and levodopa.

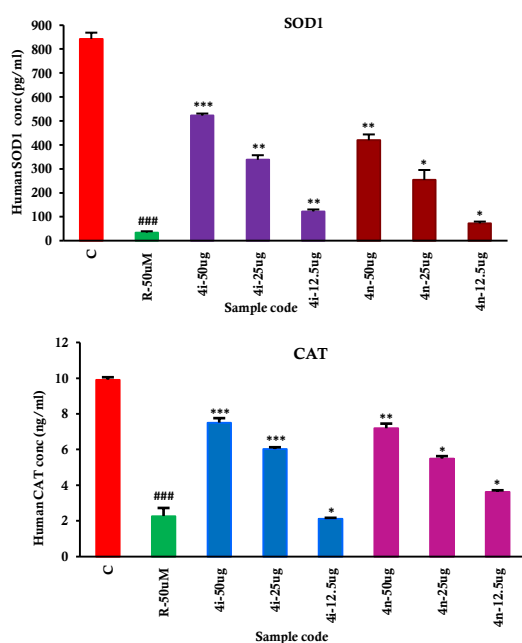

**Fig. 9** Effect of test compounds on SOD1, CAT and GSH levels in rotenone treated SH-SY5Y cells.
